# Supplementary material
Source: ML conference proceedings conference paper supplement (https://openreview.net/forum?id=QrEHs9w5UF)

*Easy*

gray + water

Acc: 98%

photo of a **gray** bear in **water**

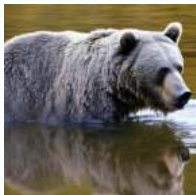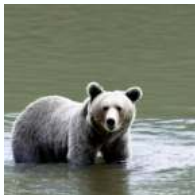

close-up + blue

Acc: 98%

close-up photo of a **blue** parrot

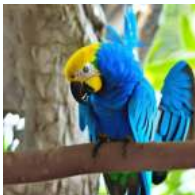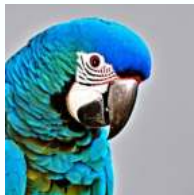

red + lay + stare

Acc: 44%

photo of a **red** fox **laying** and **staring** at the camera

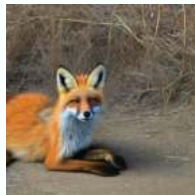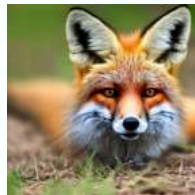

*Hard*

cub + climbing + tree

Acc : 8%

photo of a bear **cub** **climbing** a **tree**

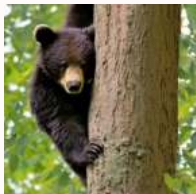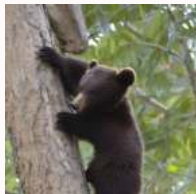

white + grass field

Acc: 38%

photo of a **white** parrot on a **grass field**

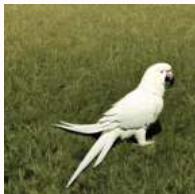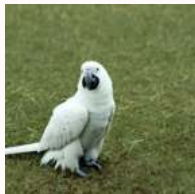

zoo + fence

Acc: 2%

photo of a fox in a **zoo** behind **fence**

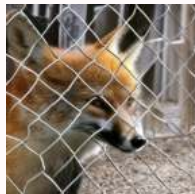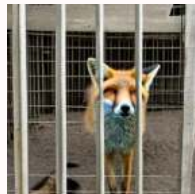

Supplement: supplementary_material [file attachment]
