# Supplementary material
Source: ML conference proceedings conference paper supplement (https://openreview.net/forum?id=QrEHs9w5UF)
Supplement: supplementary_material [file attachment]

Accuracy: 90%

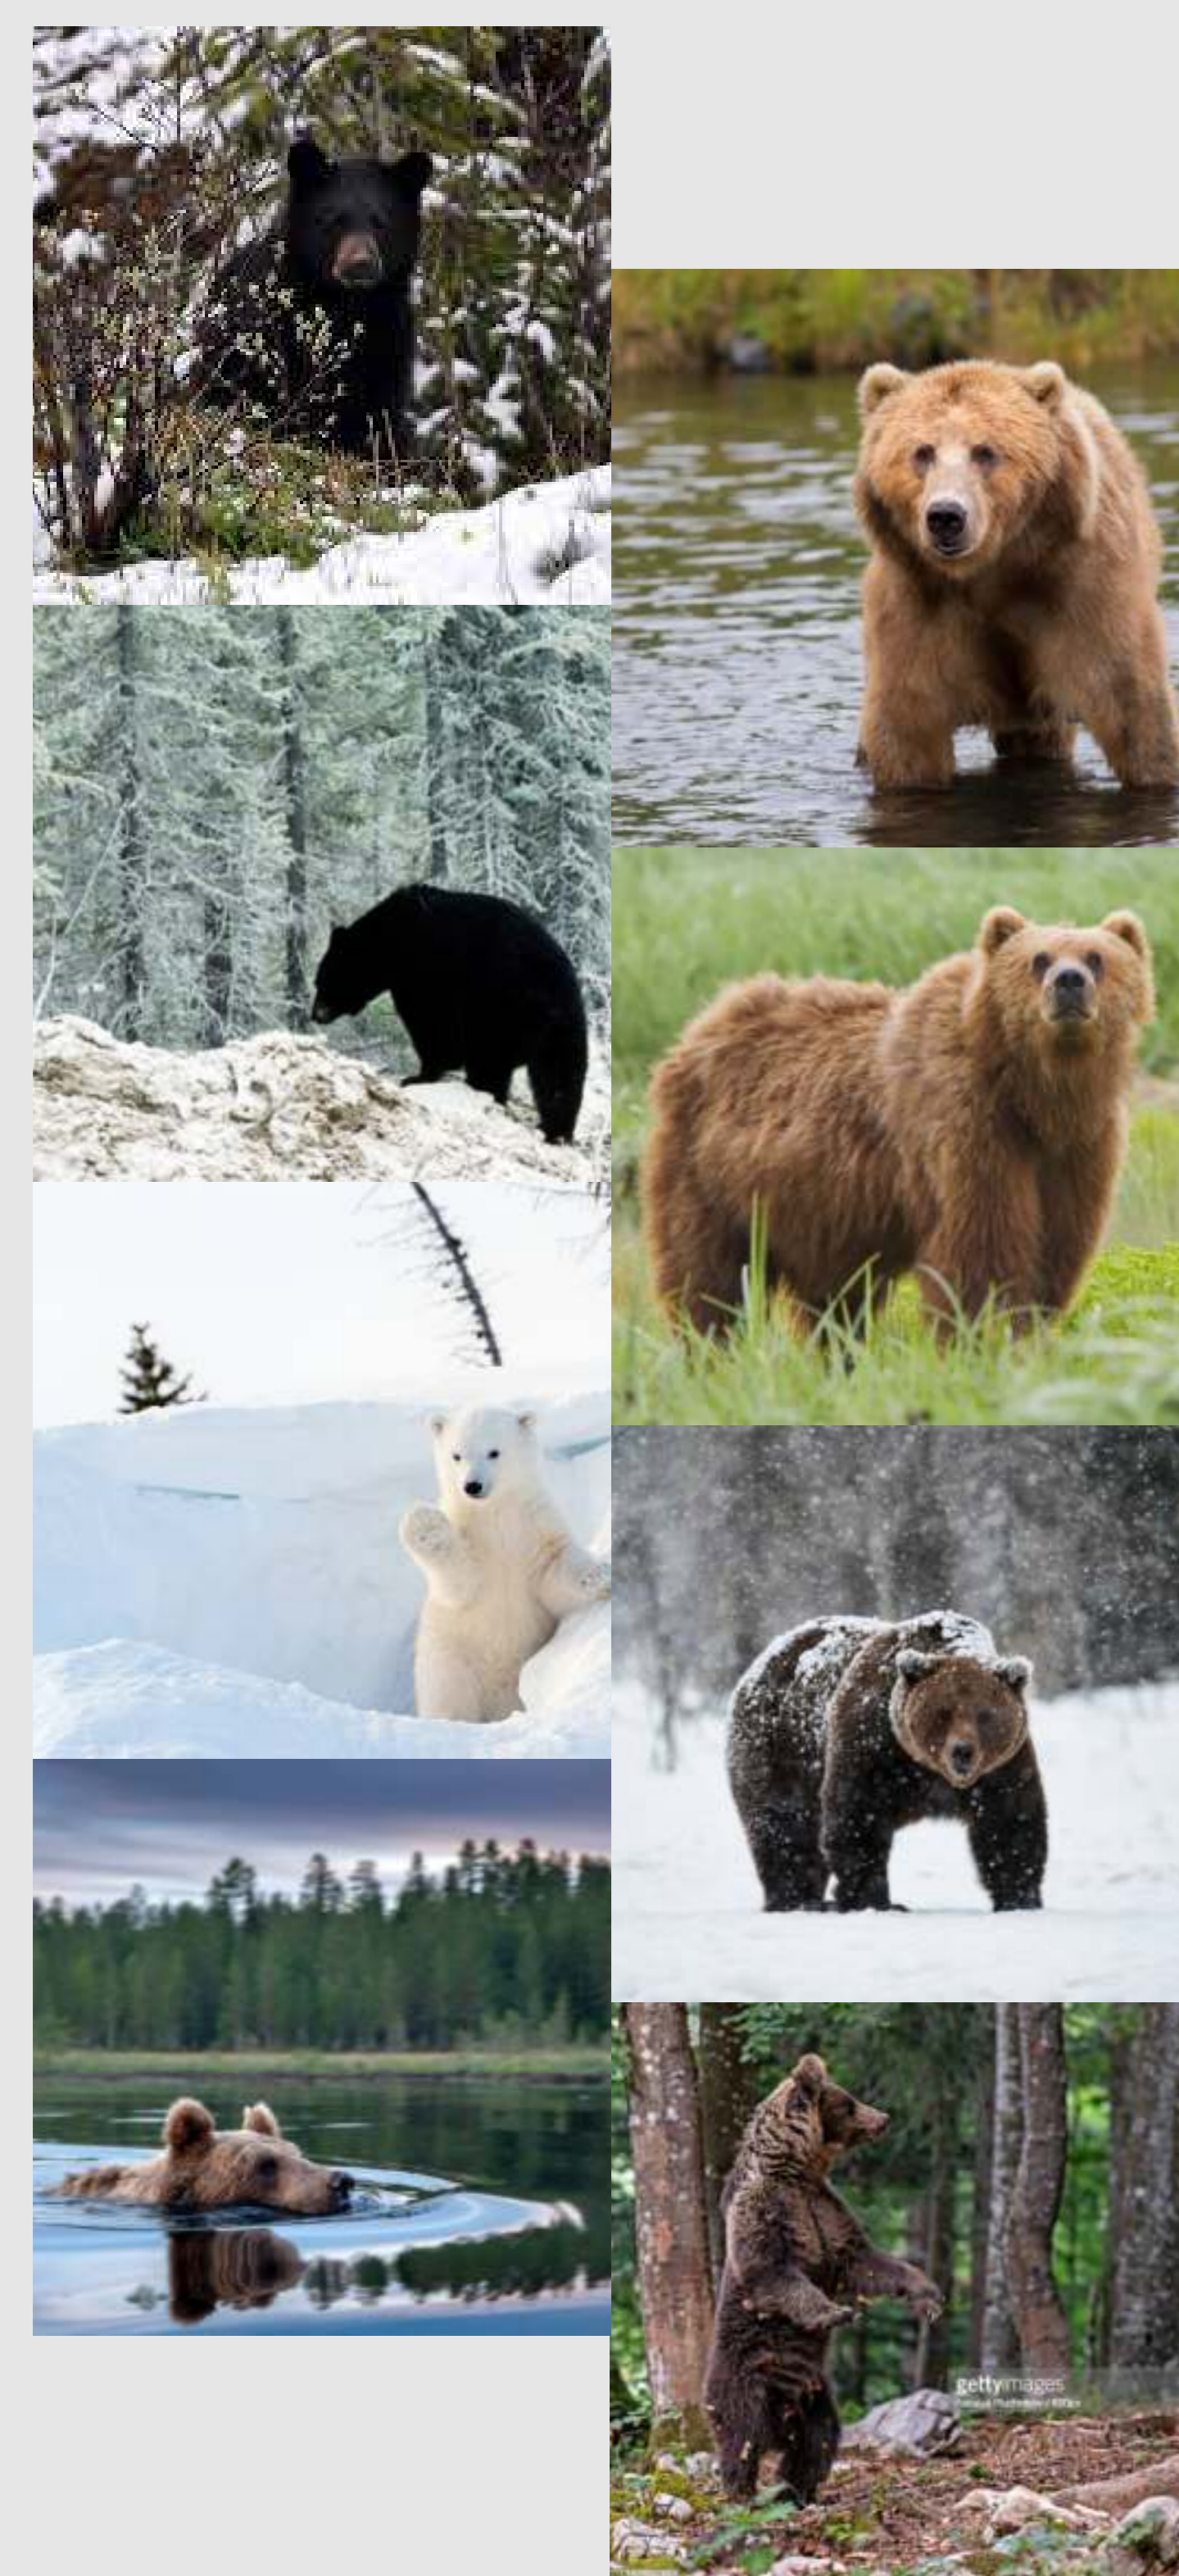

# Putting Interpretability First

## Extract Tags from Images

Extract Tags

black, snow, tree, hide, ...

brown, stare, stand, water, ...

brown, tree, forest, stand, stone, ...

## Search

Combination of Tags

black  
black+ forest  
black+ snow+ forest  
brown+ grass  
brown+ snow  
white+ hang+ tree  
.....

## Detected Failure Modes

**brown+snow**  
  
30% Drop

**black+hang+tree**  
  
50% Drop

## Existing Methods

## Vision-Language Rep. Space

CLIP
