# Supplementary material
Source: ML conference proceedings conference paper supplement (https://openreview.net/forum?id=QrEHs9w5UF)
Supplement: supplementary_material [file attachment]

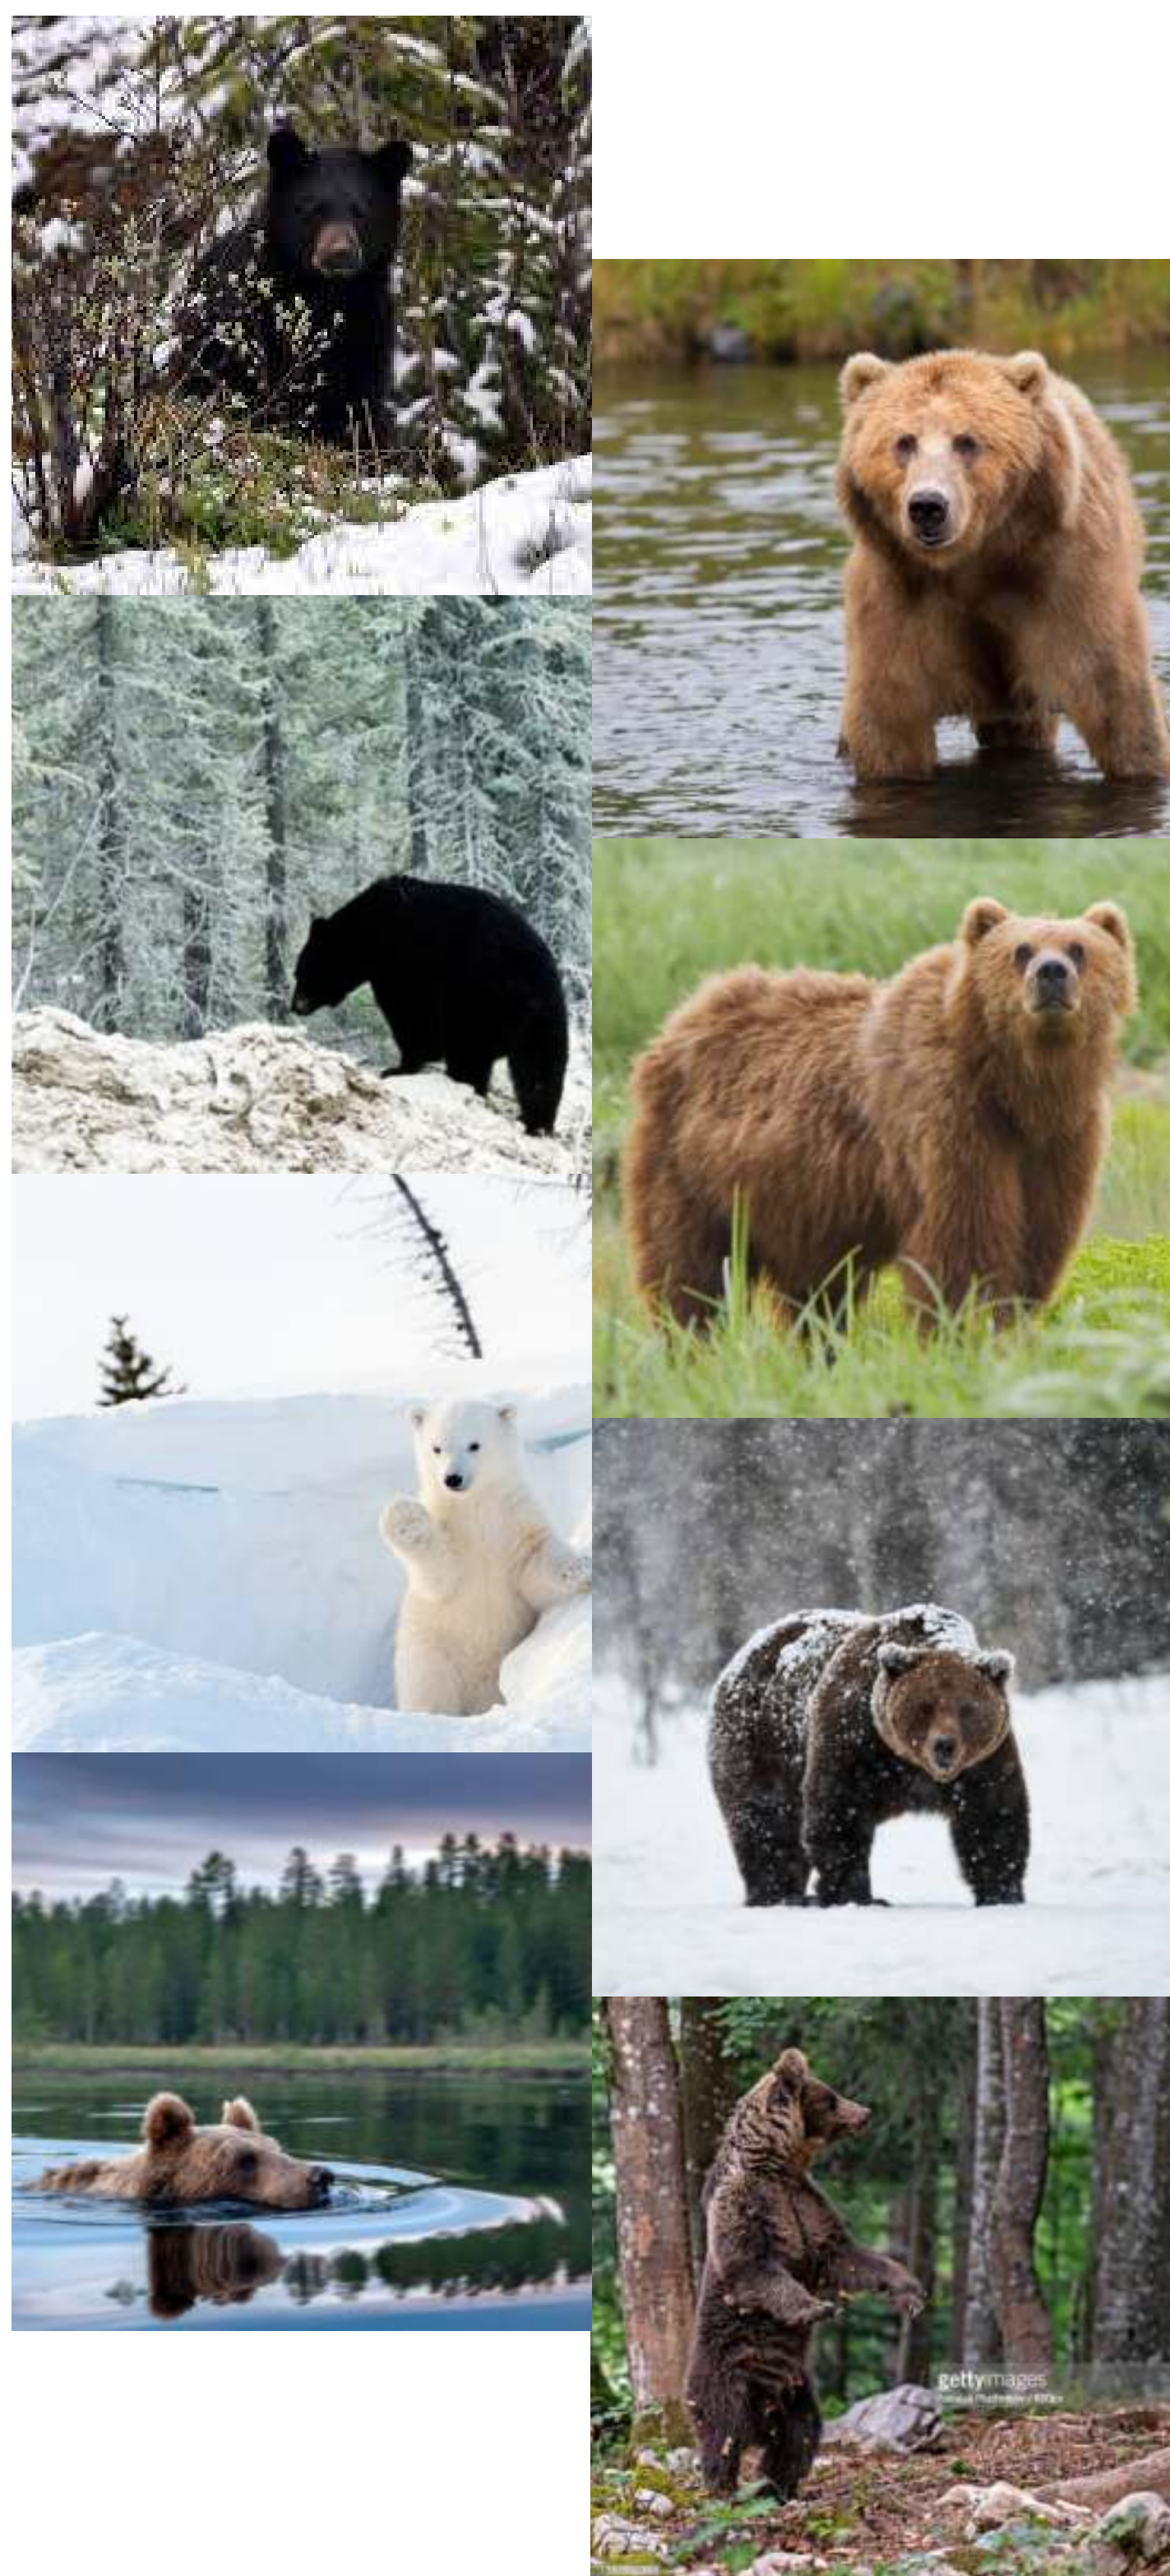

Accuracy: 90%

Extract  
Tags

## Extracted Tags from Images

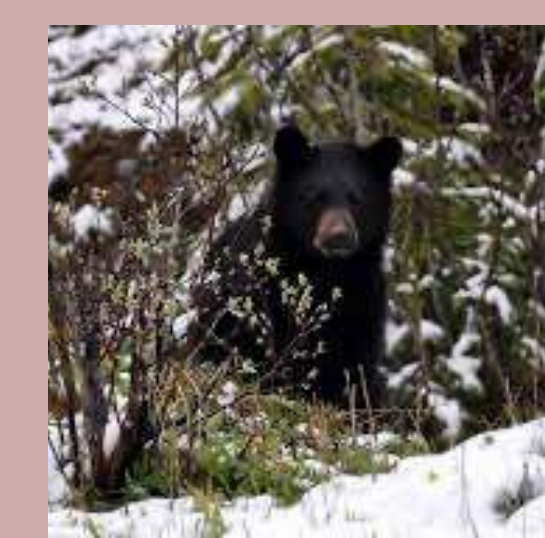

black, snow, tree, hide, ...

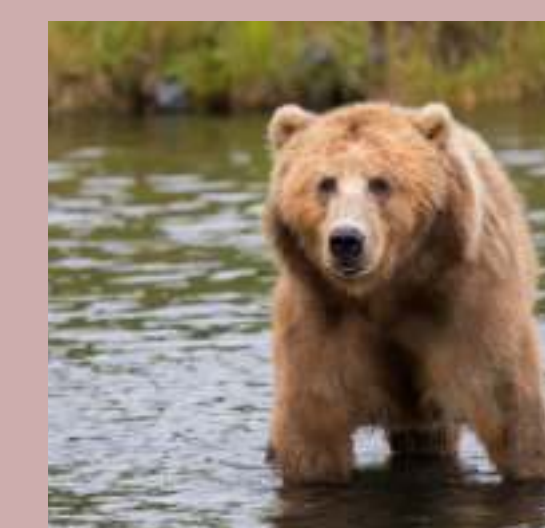

brown, stare, stand, water, ...

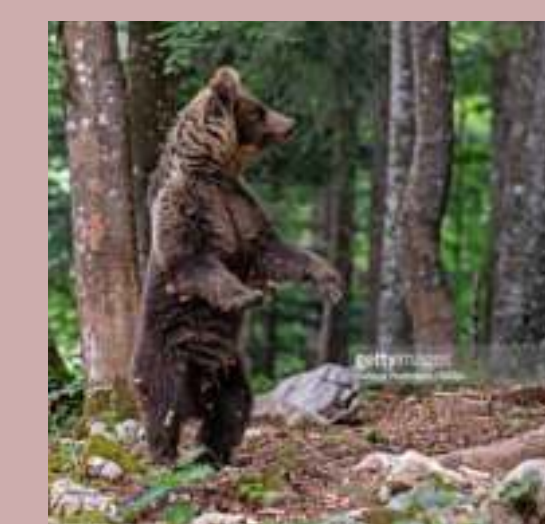

brown, tree, forest, stand, stone, ...

Combination of Tags

## Exhaustive Search

black  
black+ forest  
black+ snow+ forest  
brown+ grass  
brown+ snow  
white+ hang+ tree  
.....

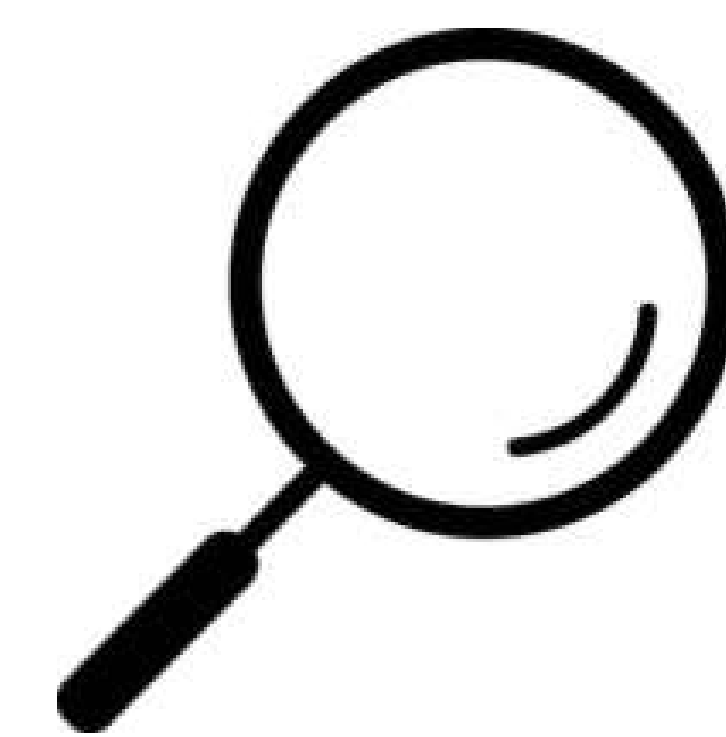

## Detected Failure Modes

**black+ hang+ tree**

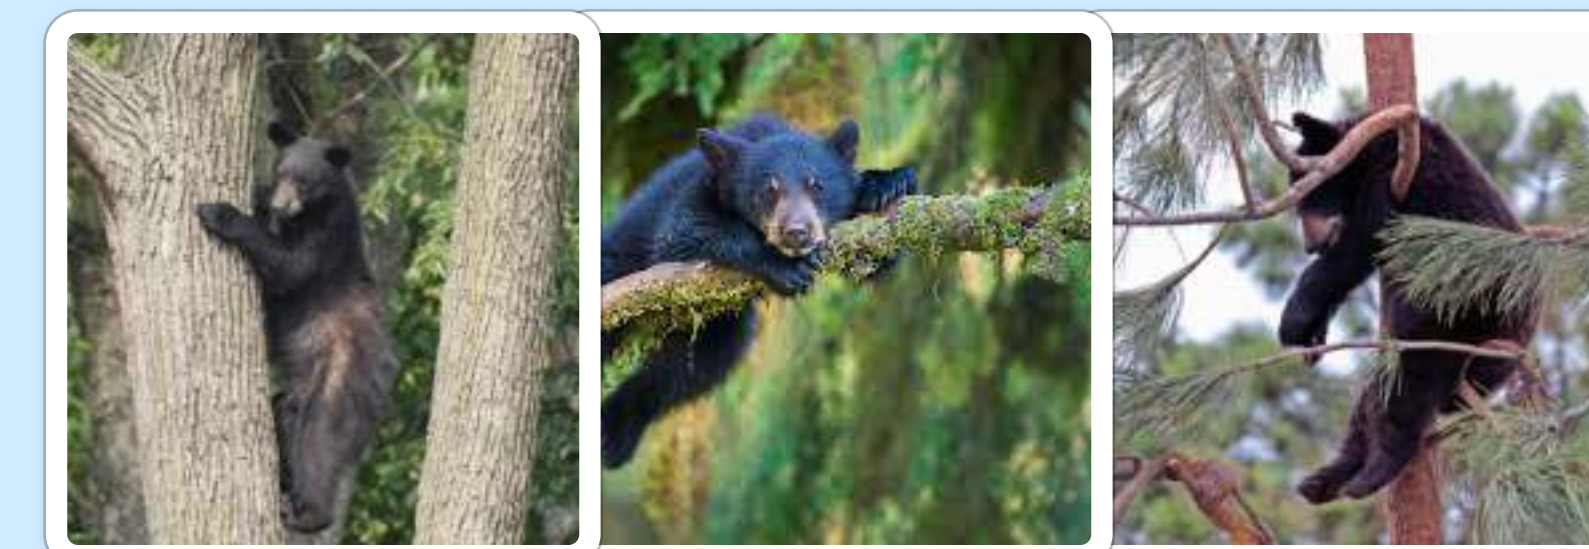

30% Drop

**brown+ snow**

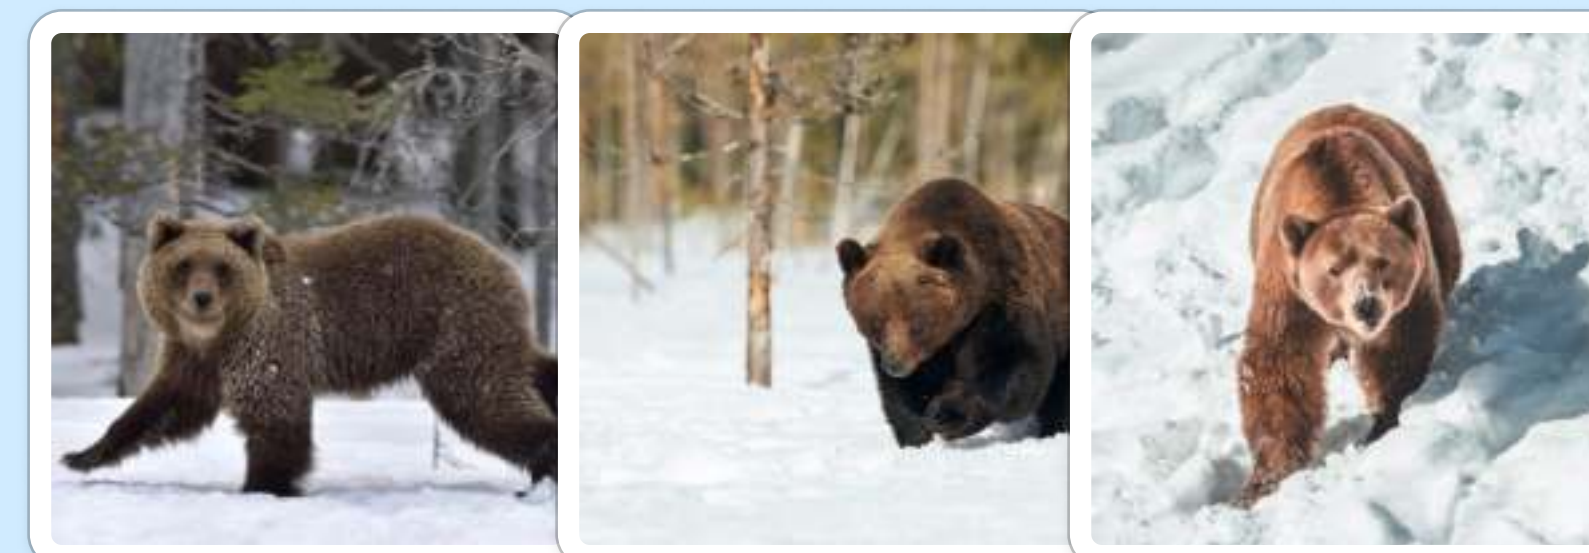

50% Drop
