# Supplementary material
Source: ML conference proceedings conference paper supplement (https://openreview.net/forum?id=QrEHs9w5UF)
Supplement: supplementary_material [file attachment]

## Existing Methods

*image-text similarity score*

(I) Extracting Failure  
Modes

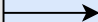

(II) **Interpreting**  
Failure Modes

*vision-language latent space*

## PRIME

(I) Extracting  
**Interpretable** Tags

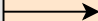

(II) Extracting Failure  
Modes
