# Supplementary material
Source: ML conference proceedings conference paper supplement (https://openreview.net/forum?id=QrEHs9w5UF)
Supplement: supplementary_material [file attachment]

Accuracy: 90%

# Putting Interpretability First

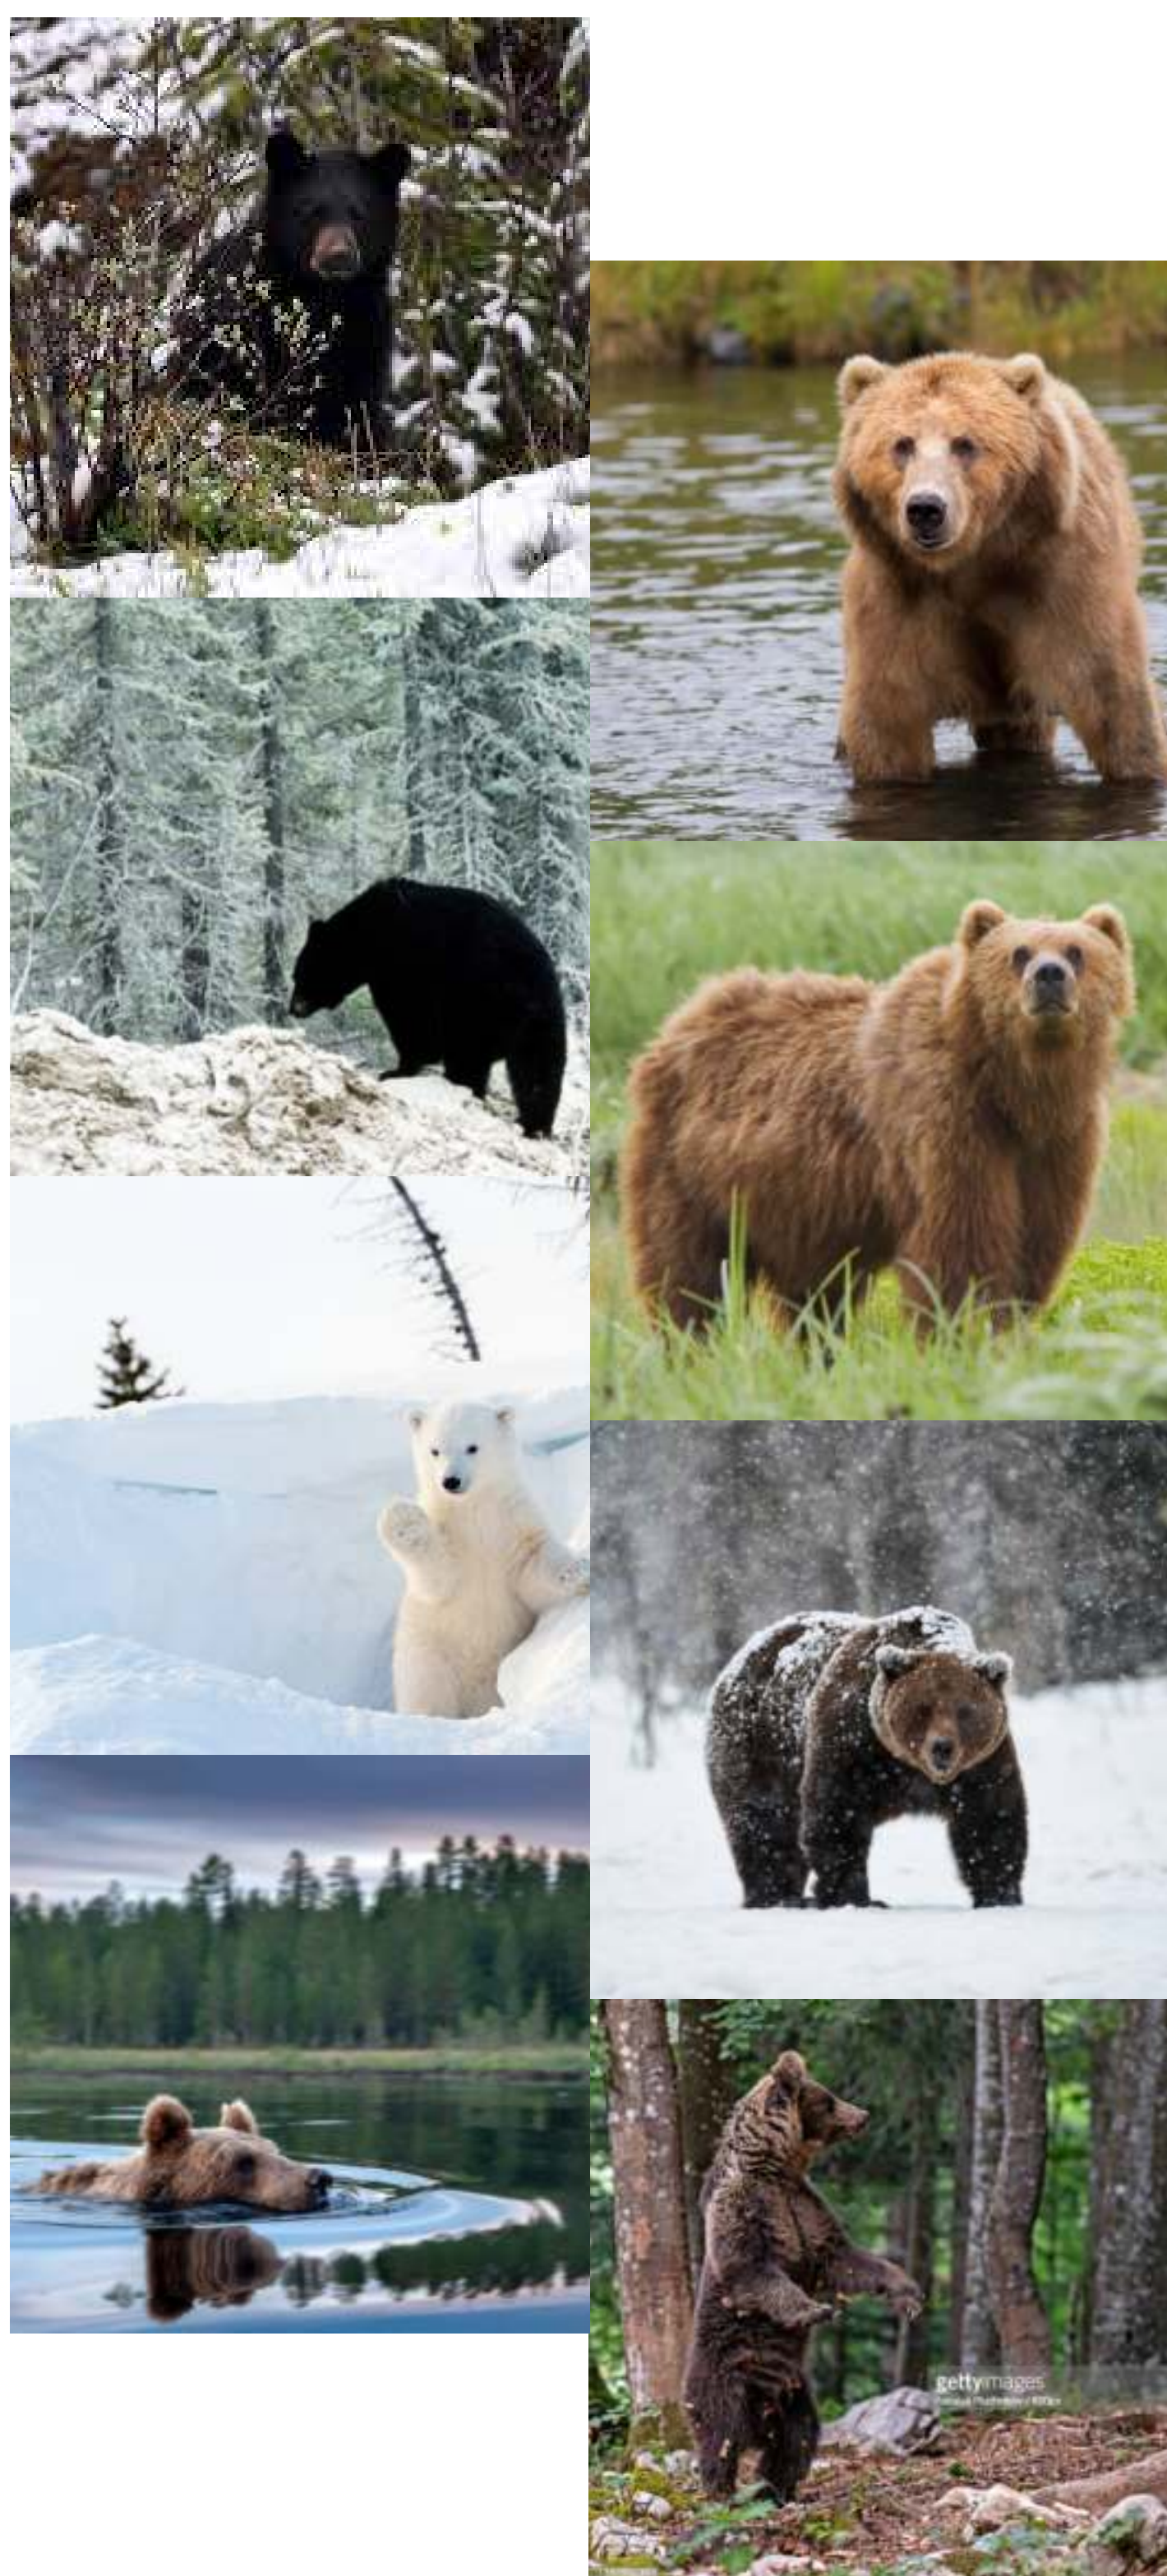

Extract  
Tags

## Extract Tags from Images

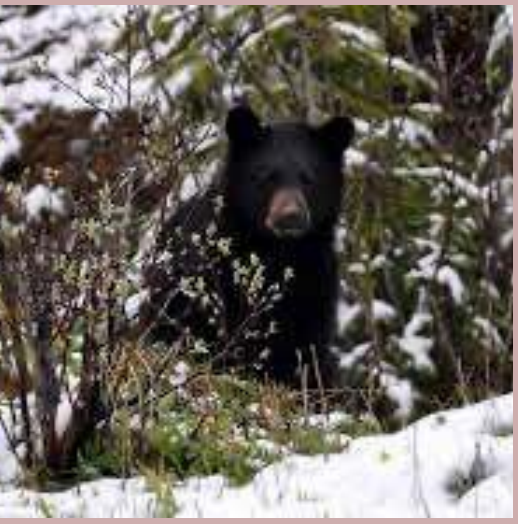

black, snow, tree, hide, ...

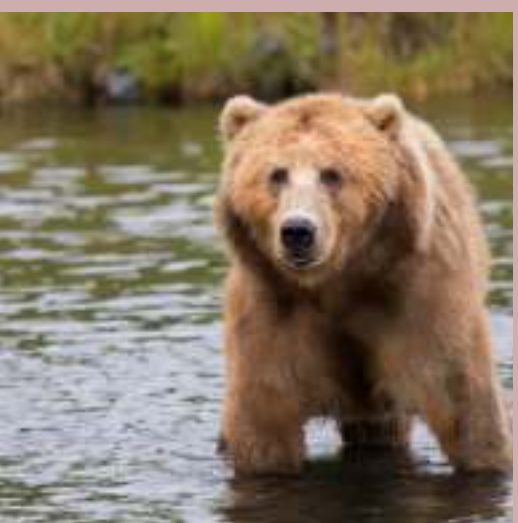

brown, stare, stand, water, ...

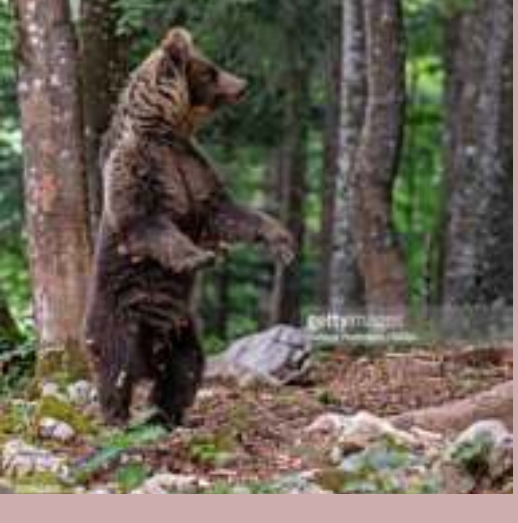

brown, tree, forest, stand, stone, ...

## Search

black  
black+ forest  
black+ snow+ forest  
brown+ grass  
brown+ snow  
white+ hang+ tree  
.....

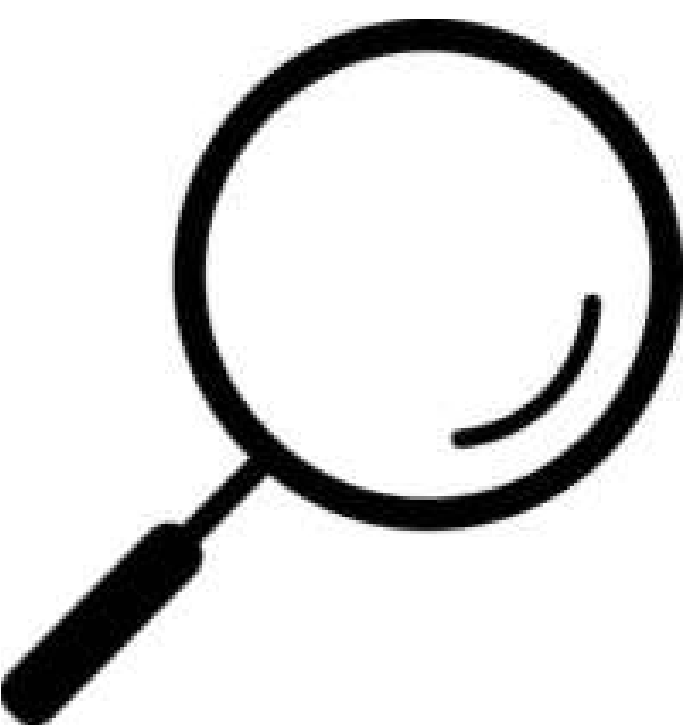

## Combination of Tags

## Vision-Language Rep. Space

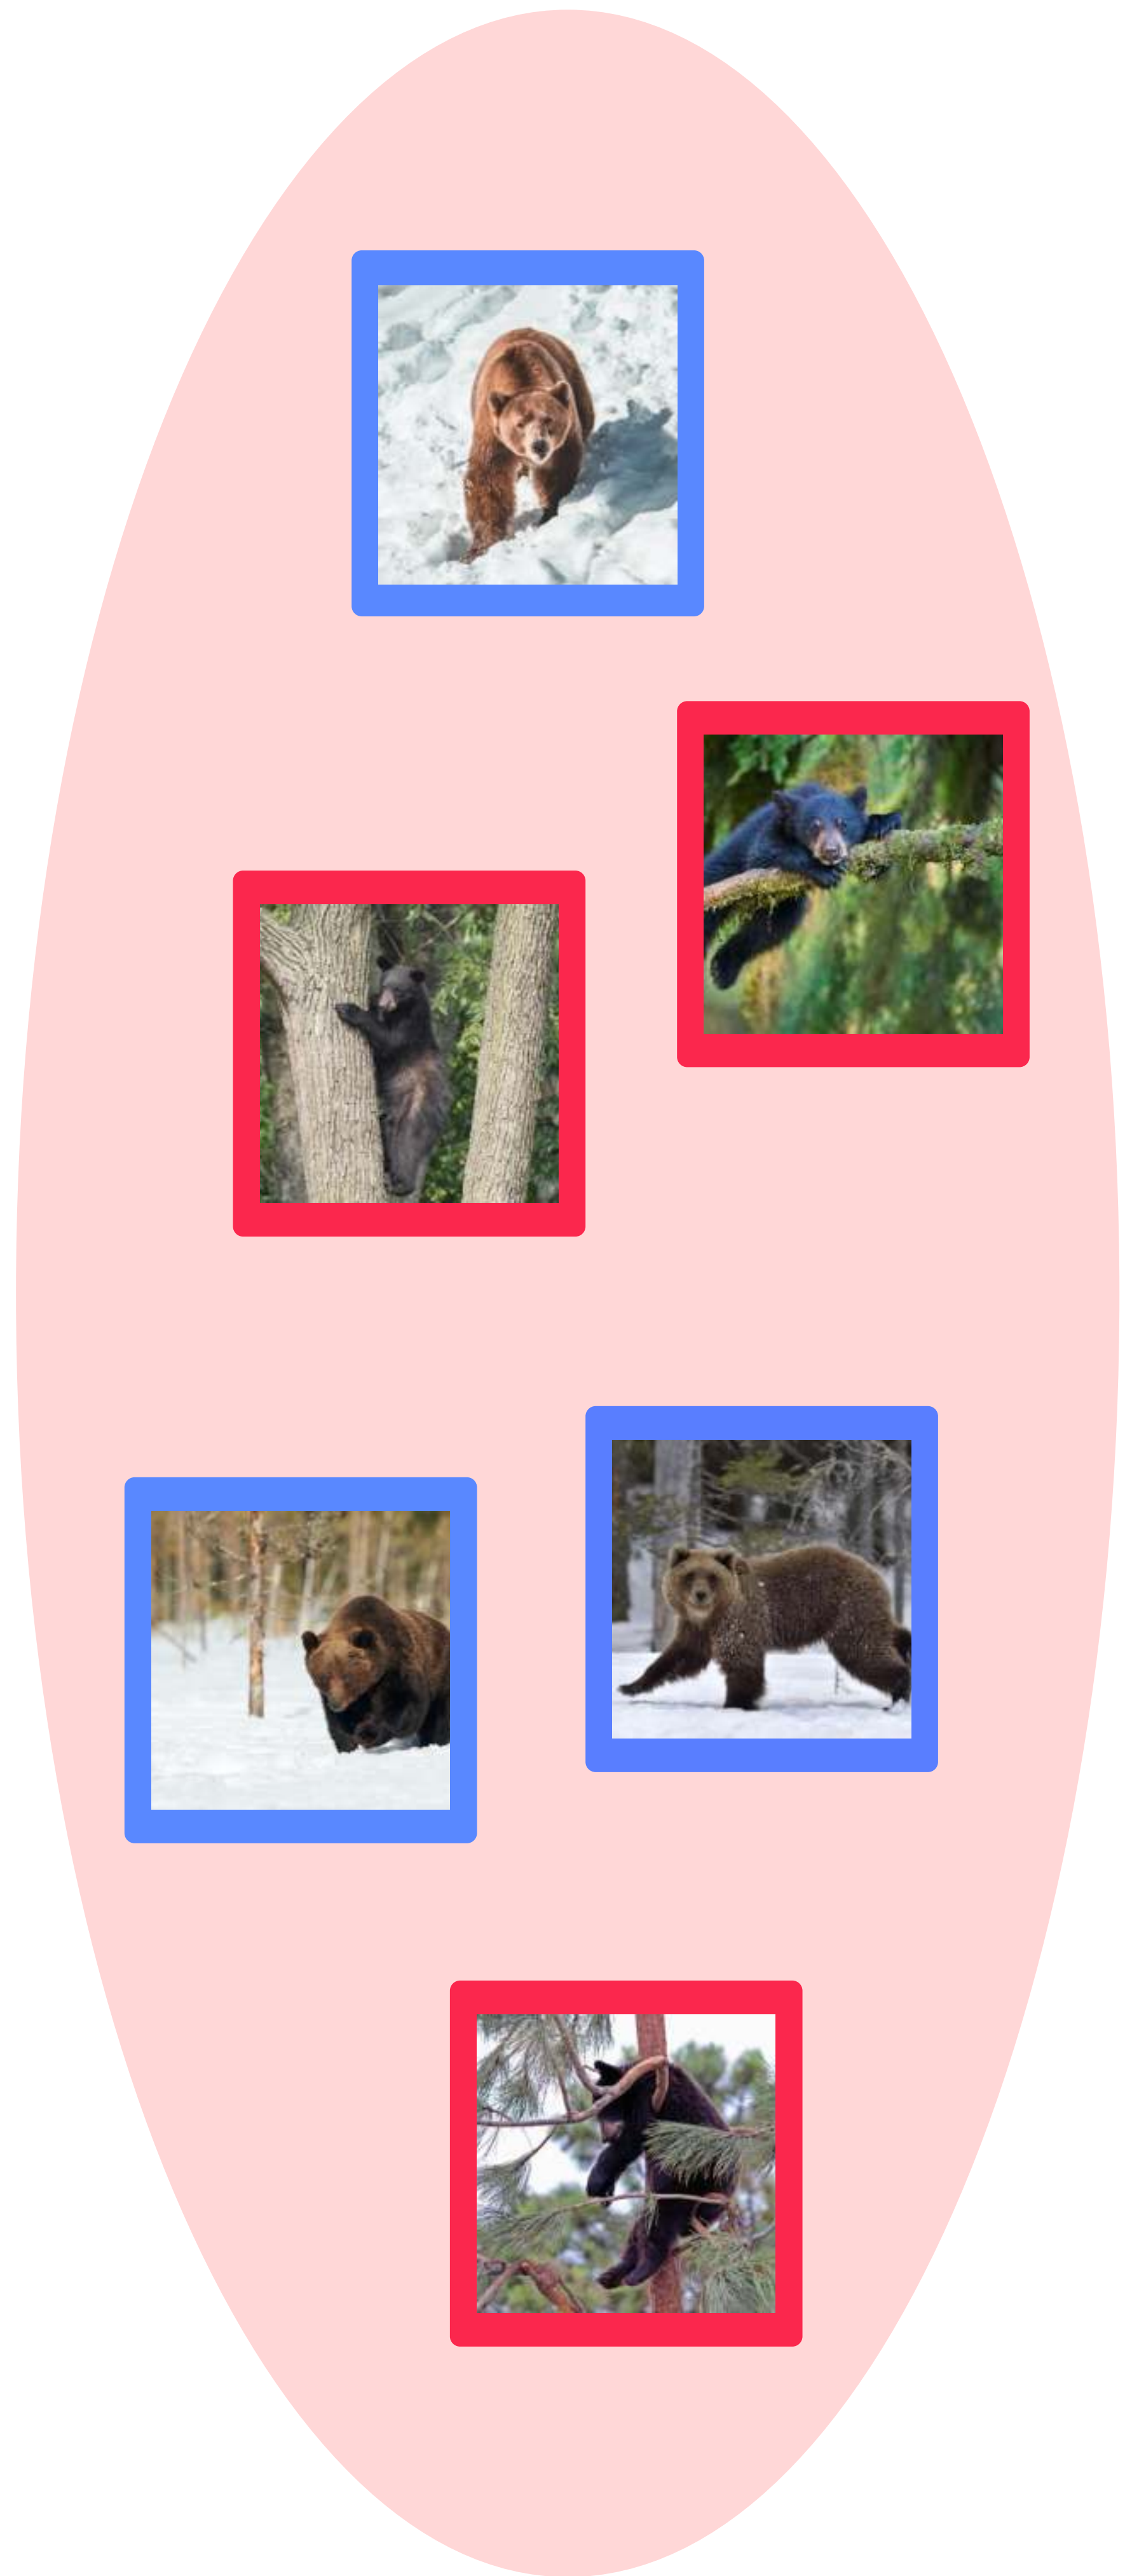

Existing Methods

CLIP

## Detected Failure Modes

**brown+snow**

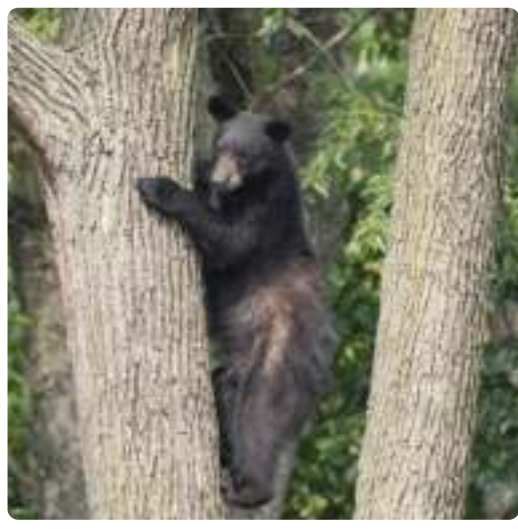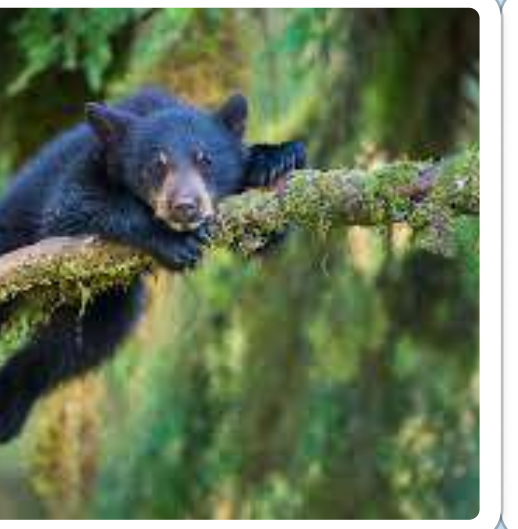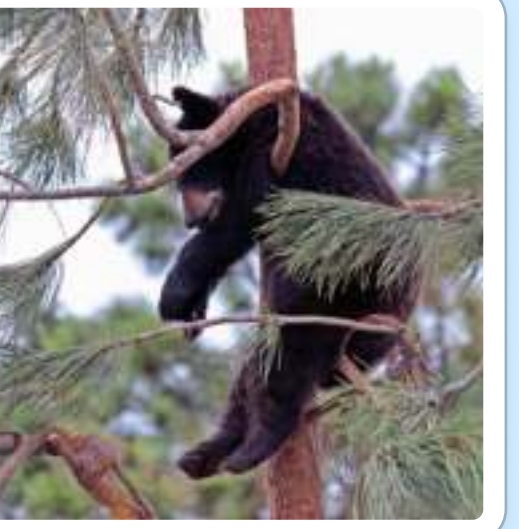

30% Drop

**black+hang+tree**

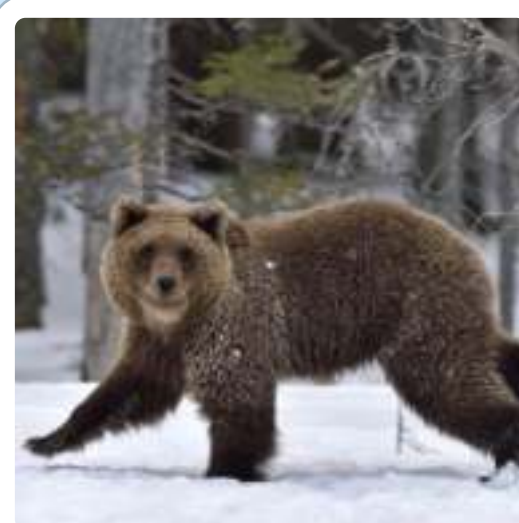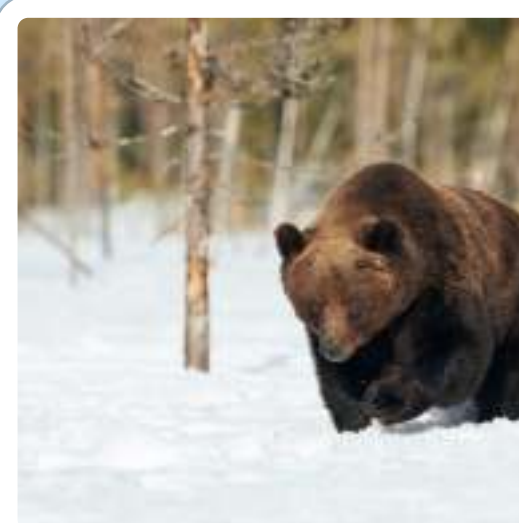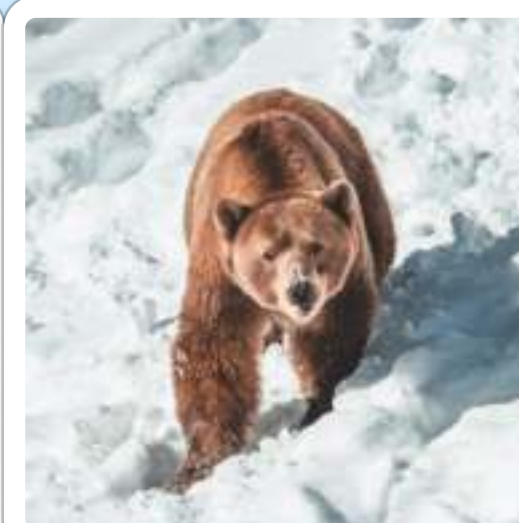

50% Drop
