# Supplementary material
Source: ML conference proceedings conference paper supplement (https://openreview.net/forum?id=QrEHs9w5UF)
Supplement: supplementary_material [file attachment]

**Hard Caption:** A photo of a bear **cub** climbing a **tree**

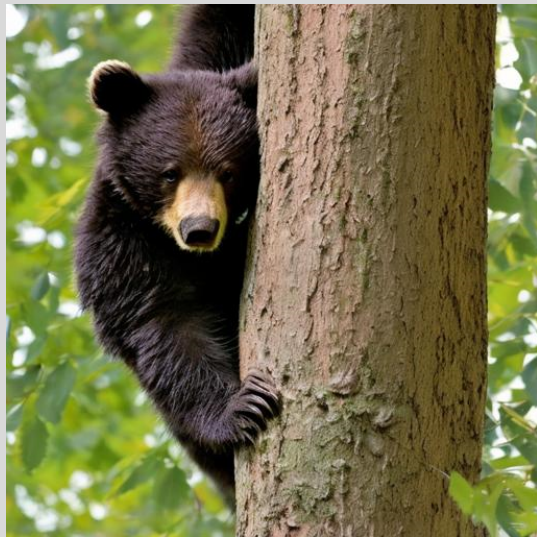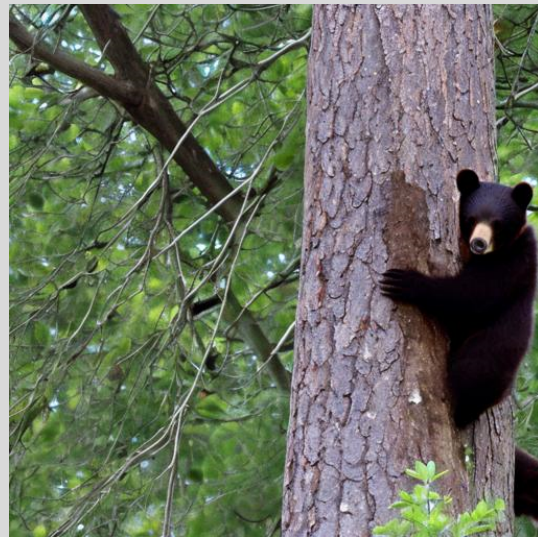

Classifier Accuracy: 8%

**Easy Caption:** A photo of a **gray** bear in **water**

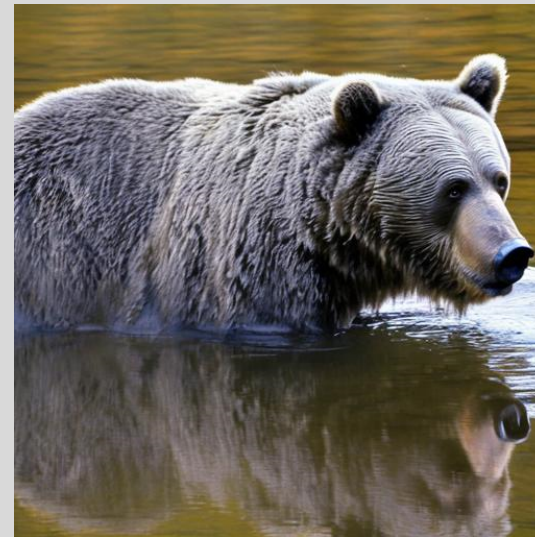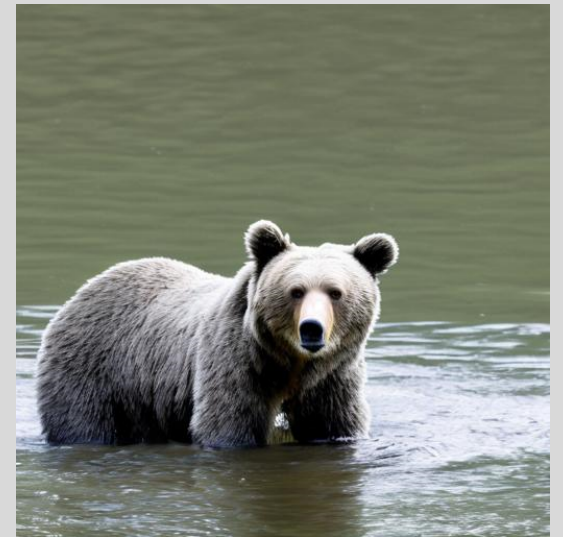

Classifier Accuracy: 98%

**Hard Caption:** A photo of a **white** parrot on a **grass field**

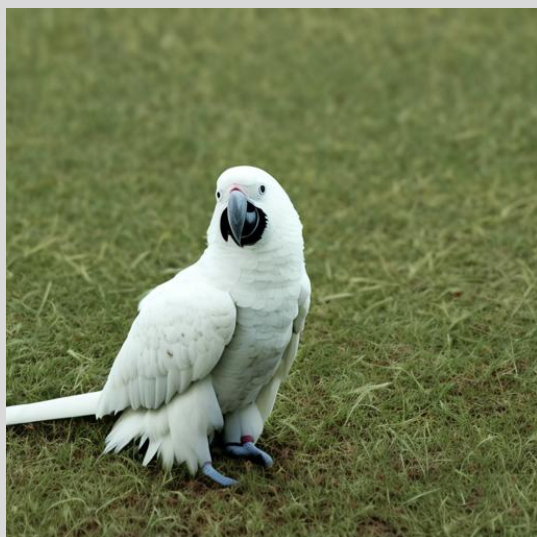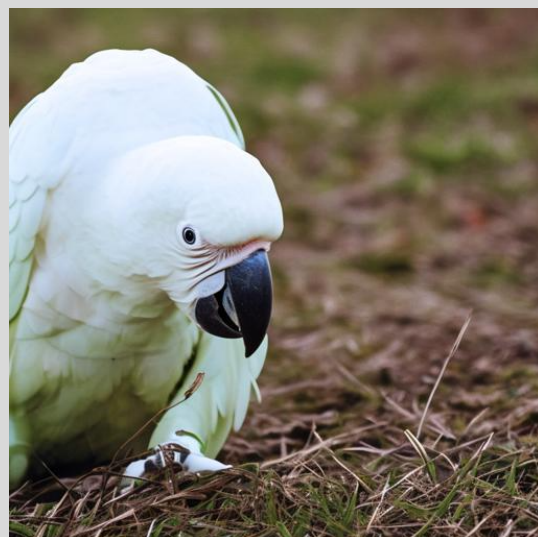

Classifier Accuracy: 38%

**Easy Caption:** A **close-up** photo of a **blue** parrot

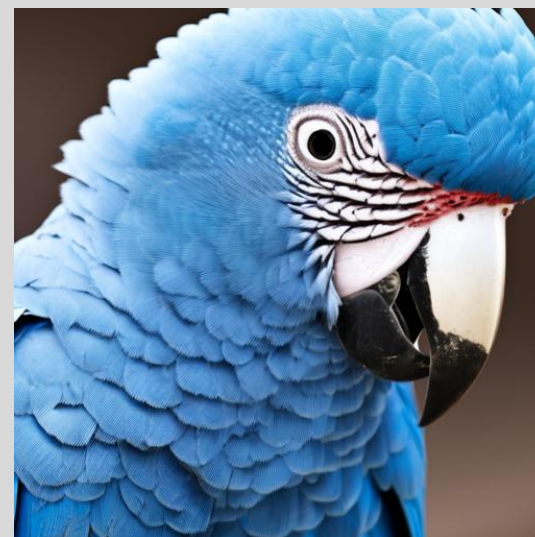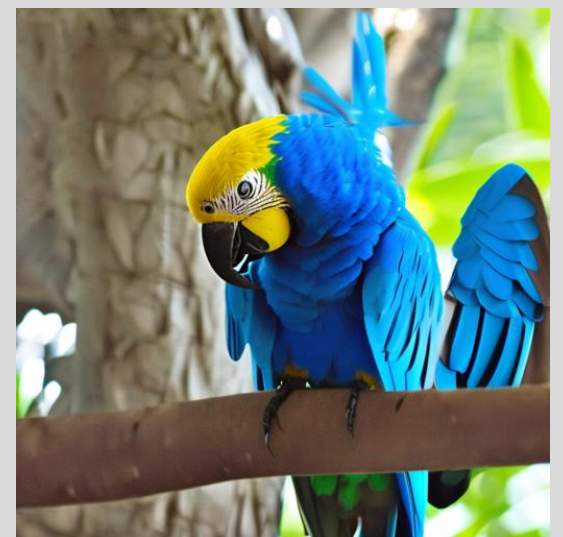

Classifier Accuracy: 98%
