# Supplementary material
Source: ML conference proceedings conference paper supplement (https://openreview.net/forum?id=QrEHs9w5UF)

**Class: Parrot**

**Failure mode description:** A photo of  
a white parrot on grass

Accuracy drop: 24% (62% → 38%)

Living-17  
Images

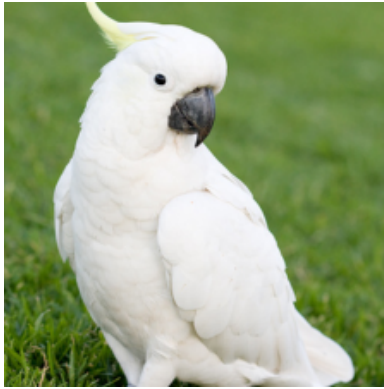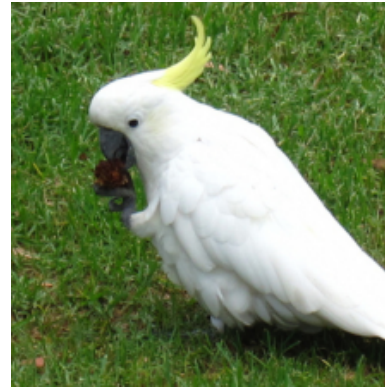

Generated  
Images

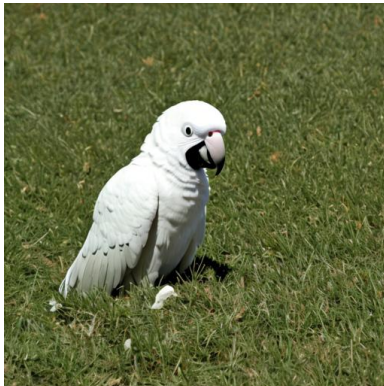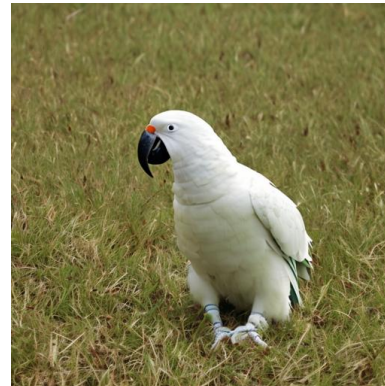

**Class: Bear**

**Failure mode description:** A black  
bear cub on a tree branch

Accuracy drop: 52% (60% → 8%)

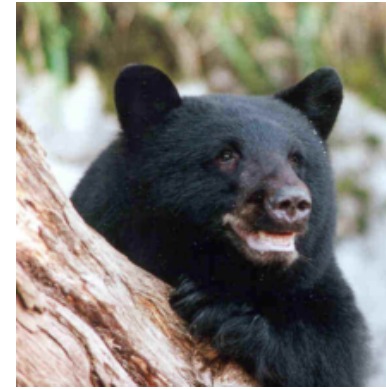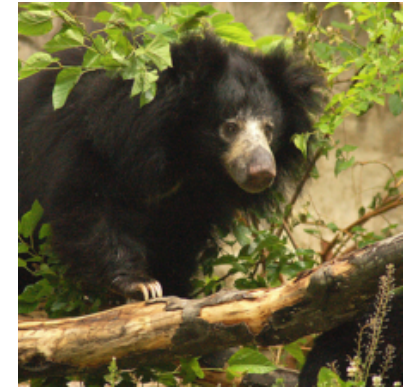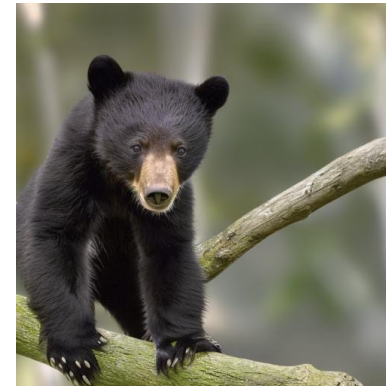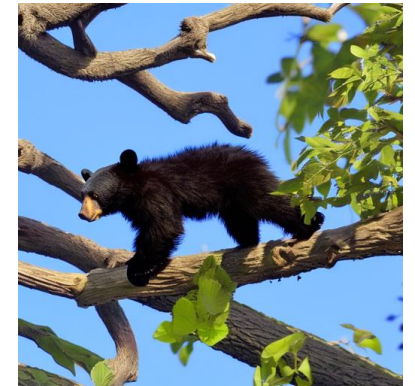

Supplement: supplementary_material [file attachment]
