# Supplementary material
Source: ML conference proceedings conference paper supplement (https://openreview.net/forum?id=QrEHs9w5UF)

## Easy Captions

**gray + water**

photo of a **gray** bear in **water** (98%)

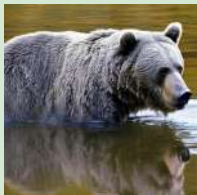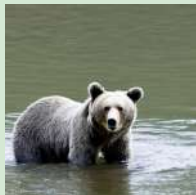

**close-up + blue**

close-up photo of a **blue** parrot (98%)

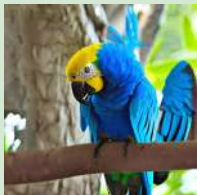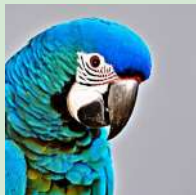

## Hard Captions

**cub + climbing + tree**

photo of a bear **cub** **climbing** a **tree** (98%)

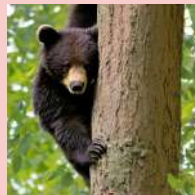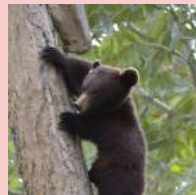

**cub + climbing + tree**

photo of a **white** parrot on a **grass field** (38%)

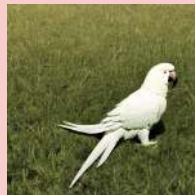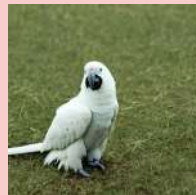

Supplement: supplementary_material [file attachment]
