# Supplementary material
Source: ML conference proceedings conference paper supplement (https://openreview.net/forum?id=QrEHs9w5UF)
Supplement: supplementary_material [file attachment]

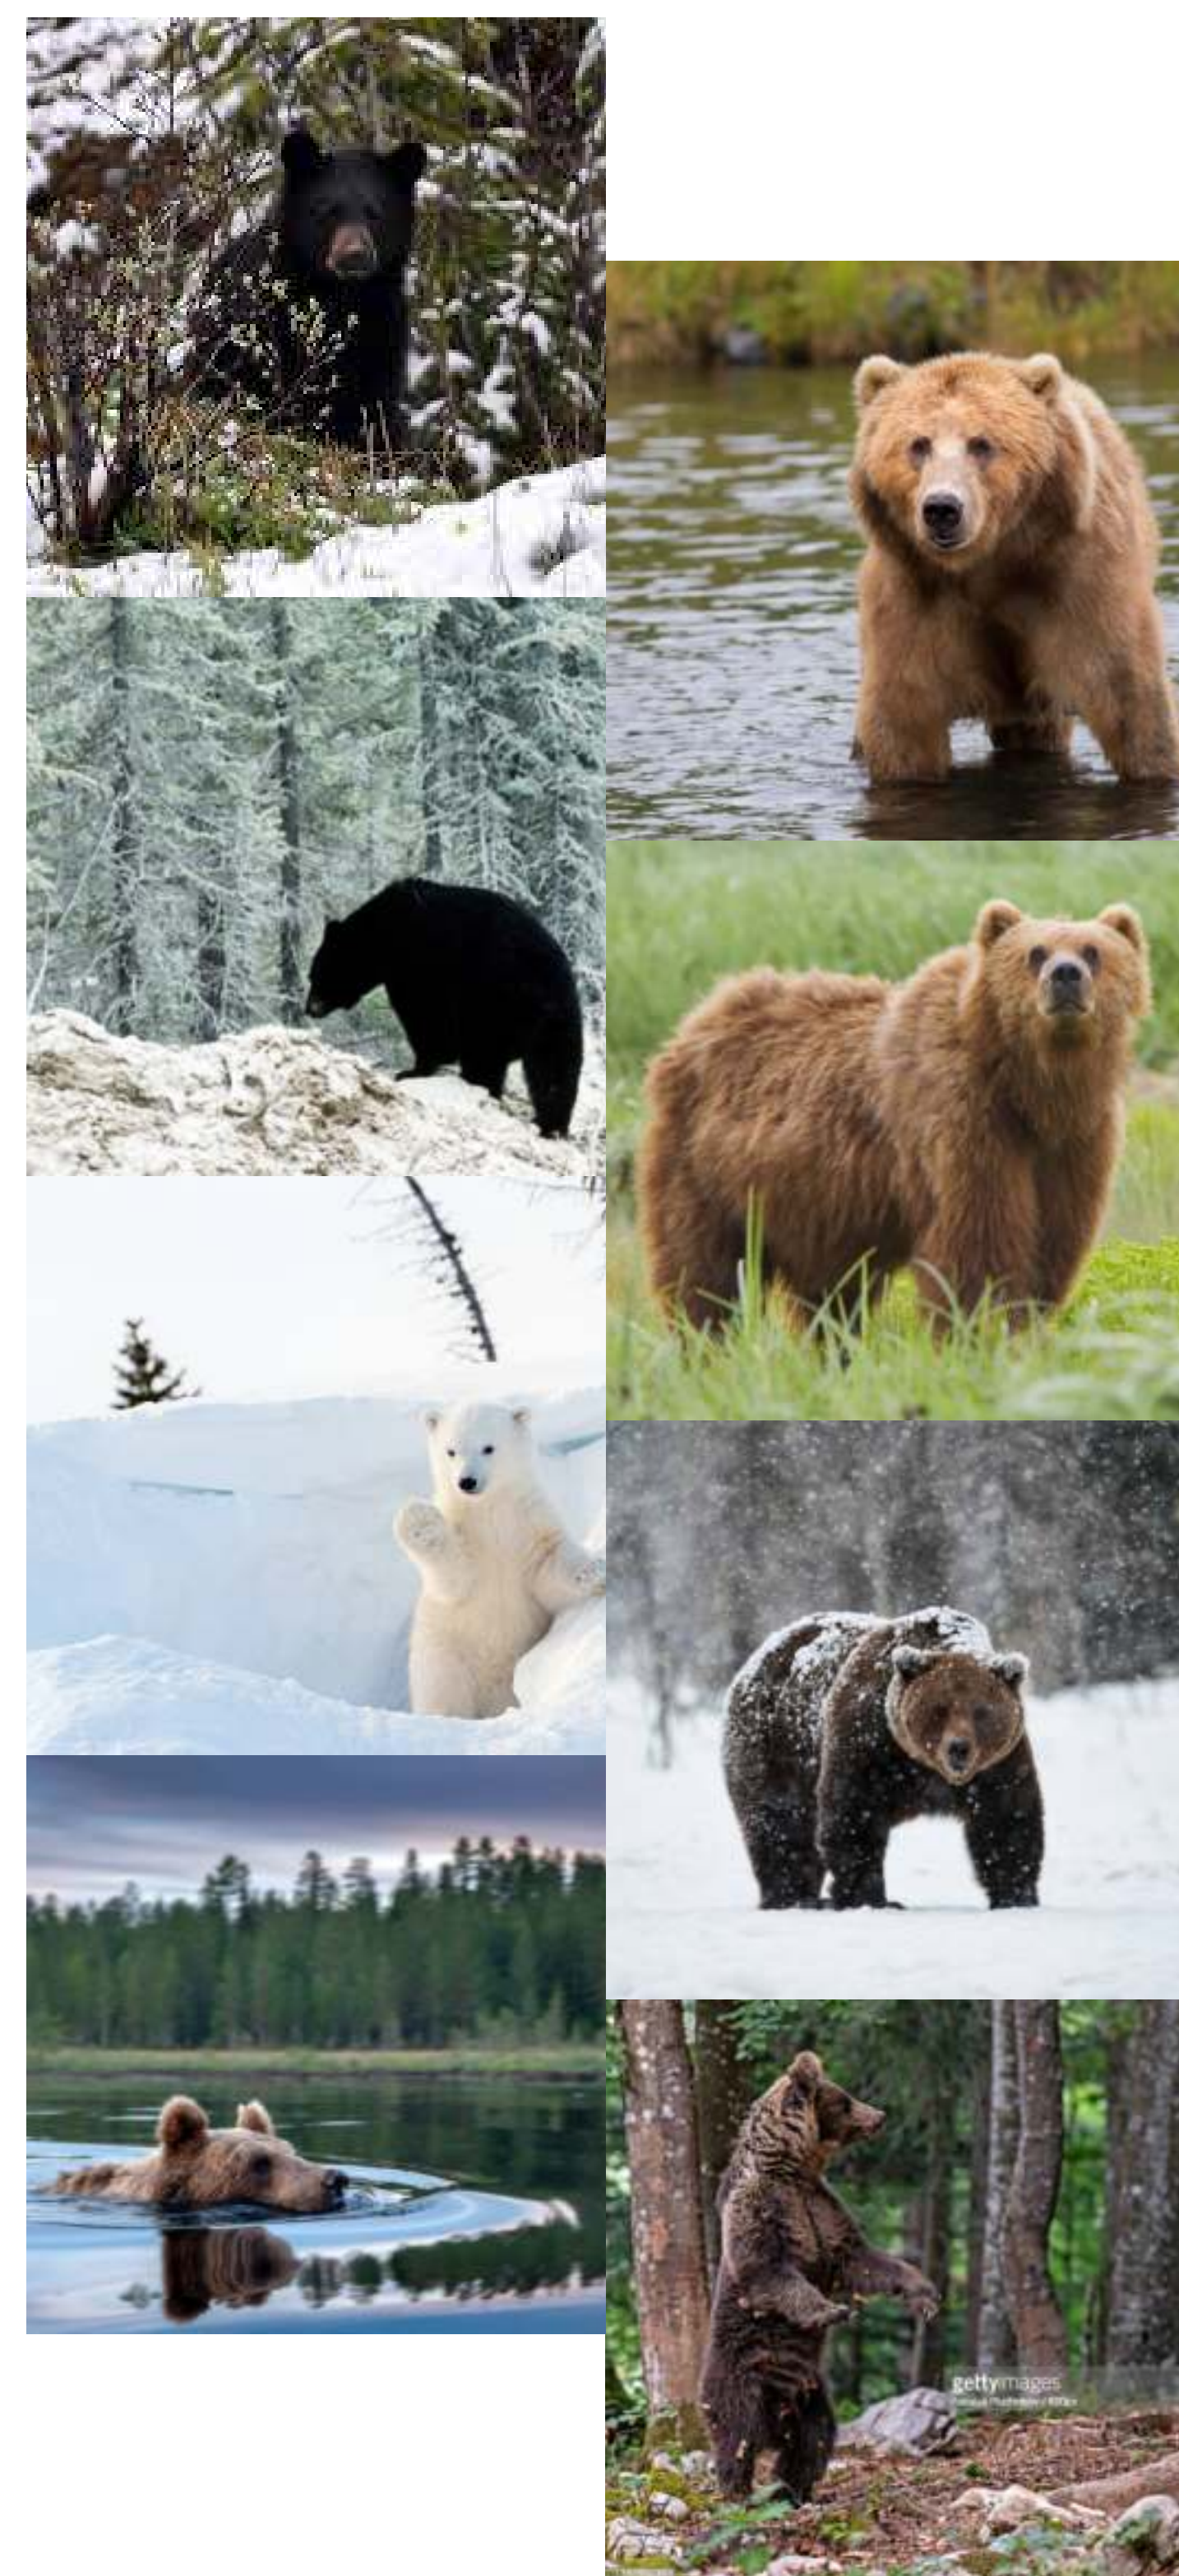

Model Accuracy: 90%

Extract  
Tags

## Extracted Tags from Images

black, snow, tree, hide, ...  
brown, stare, stand, water, ...  
brown, stare, stand, grass, floor, ...  
black, walk, snow, forest, ...  
brown, tree, forest, stand, stone, ...  
brown, hide, lake, forest, swim, ...  
white, snow, hide, stand, ...

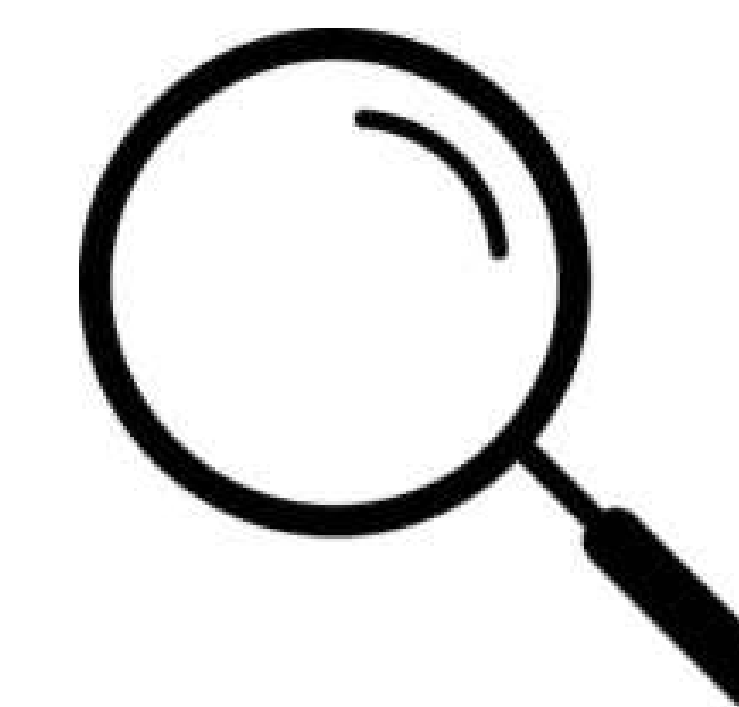

black;  
black; forest;  
black; snow; forest;  
brown; grass;  
brown; snow;  
white; hang; tree;  
....

## Exhaustive Search

## Detected Failure Modes

black; hang; tree;

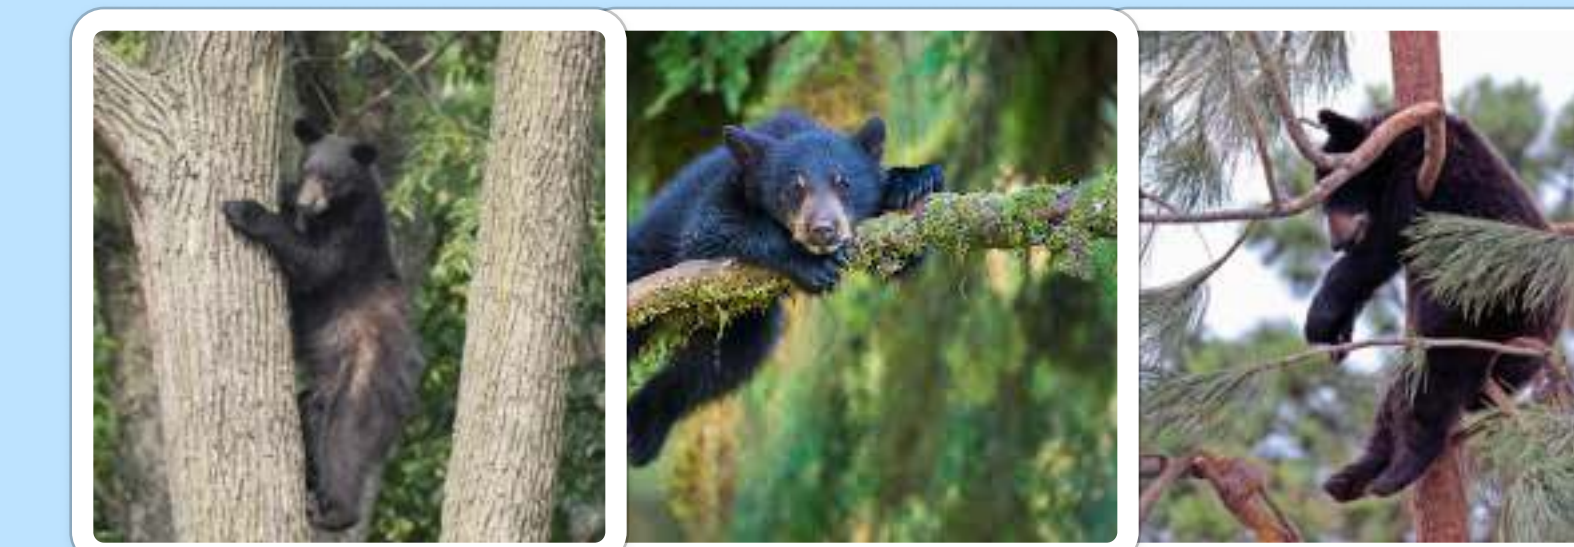

Accuracy Drop: 30%

brown; snow;

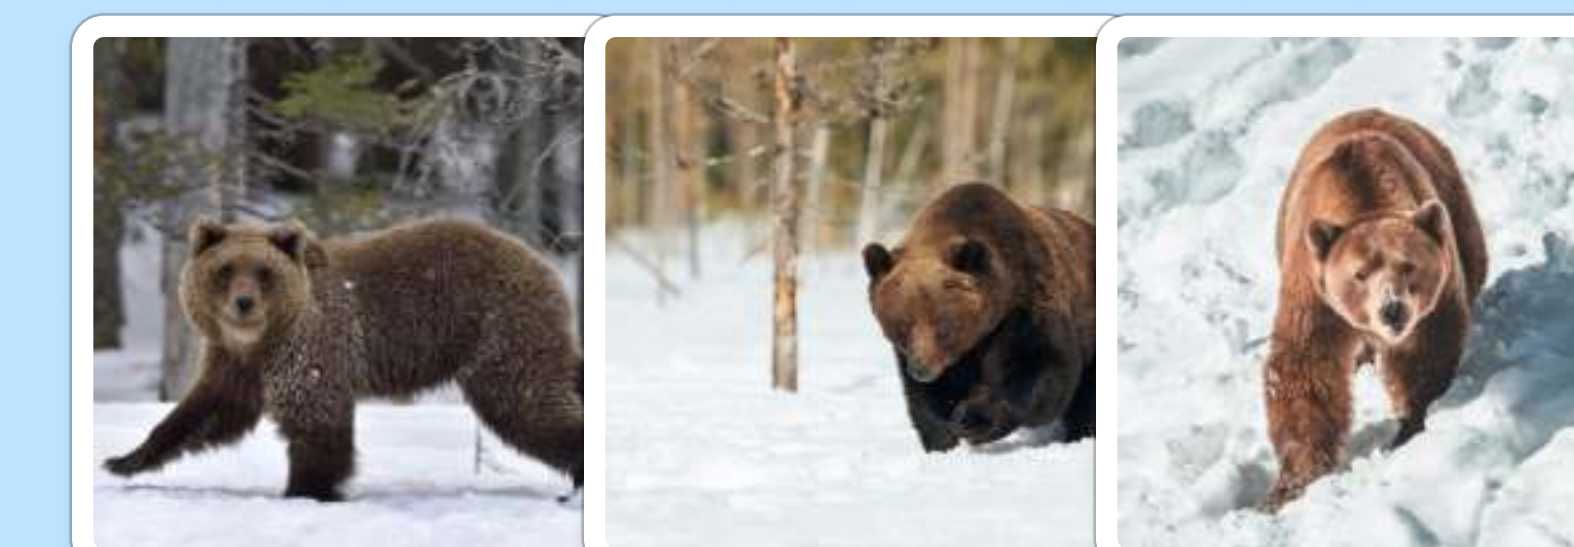

Accuracy Drop: 50%
