# Supplementary material
Source: ML conference proceedings conference paper supplement (https://openreview.net/forum?id=QrEHs9w5UF)

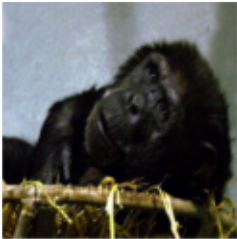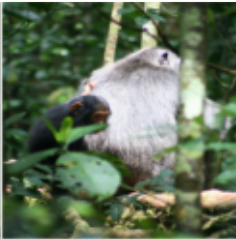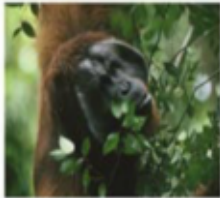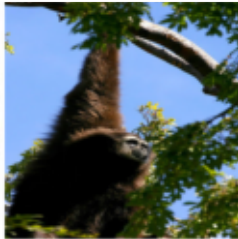

Supplement: supplementary_material [file attachment]

**CelebA** ( $s = 100, a = 25\%$ )

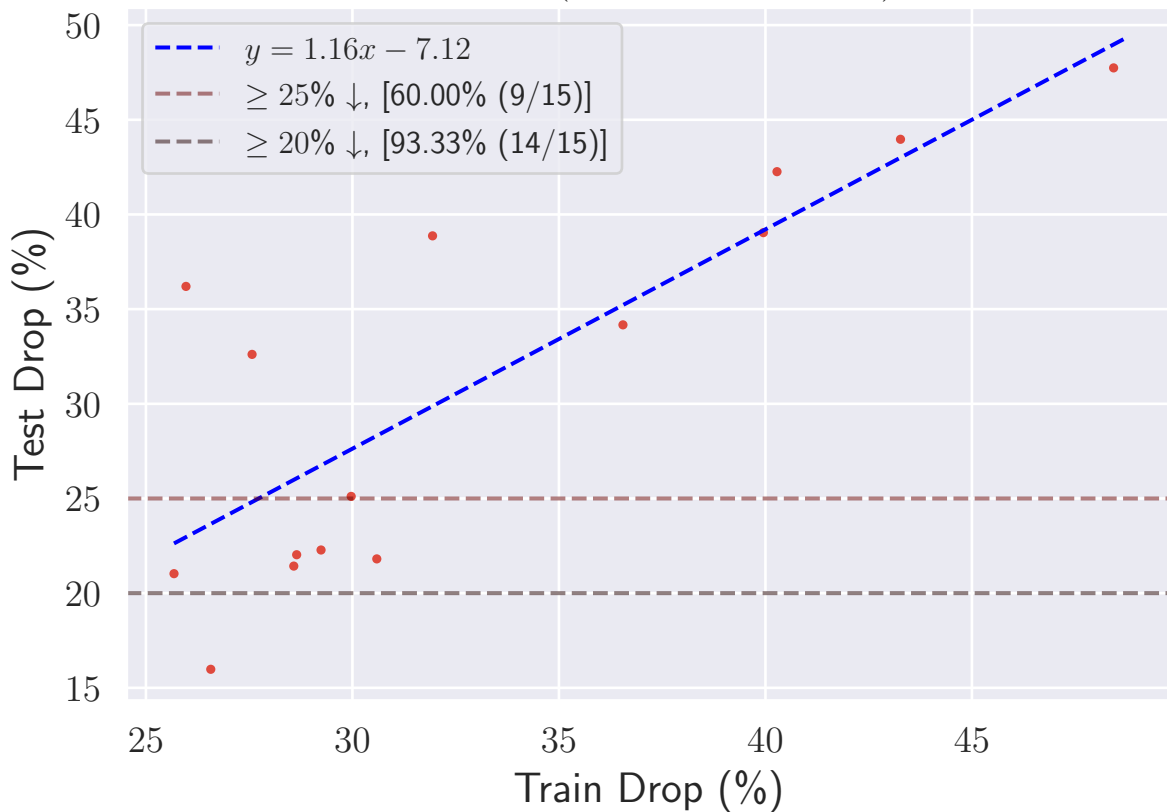

Supplement: supplementary_material [file attachment]

ape (86.23%)

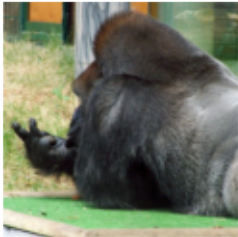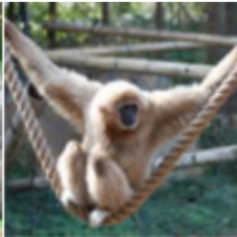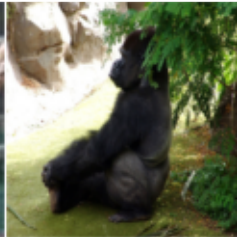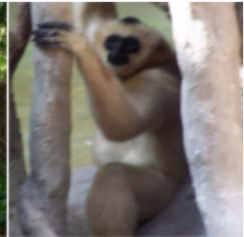

Supplement: supplementary_material [file attachment]

**CelebA** ( $s = 100, a = 30\%$ )

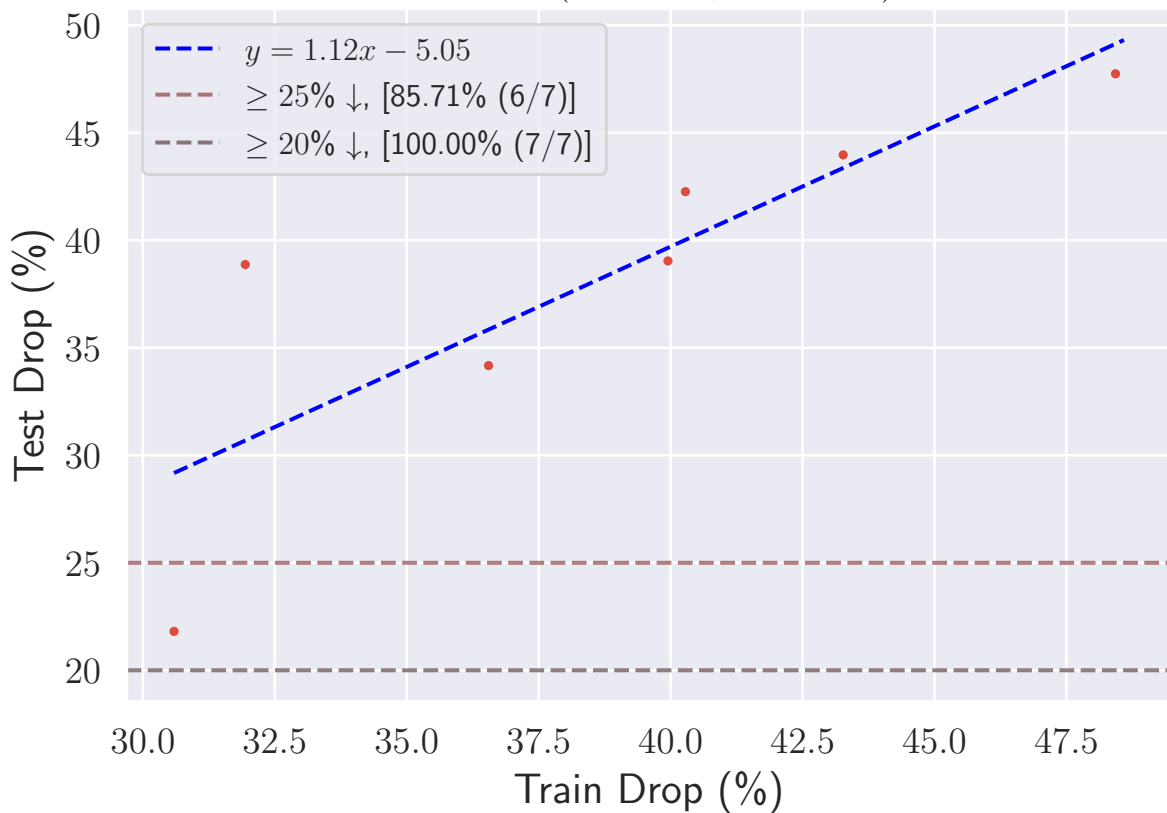

Supplement: supplementary_material [file attachment]

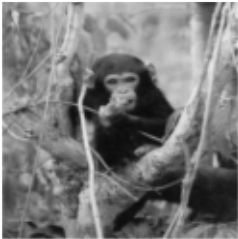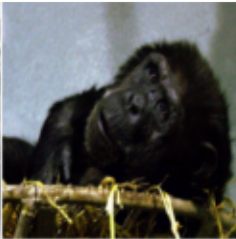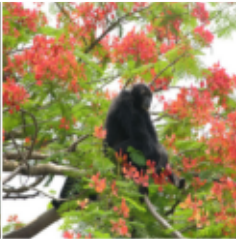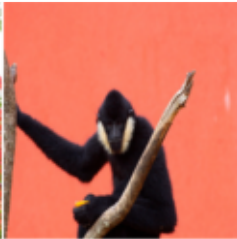

Supplement: supplementary_material [file attachment]

# Living17 DOMINO

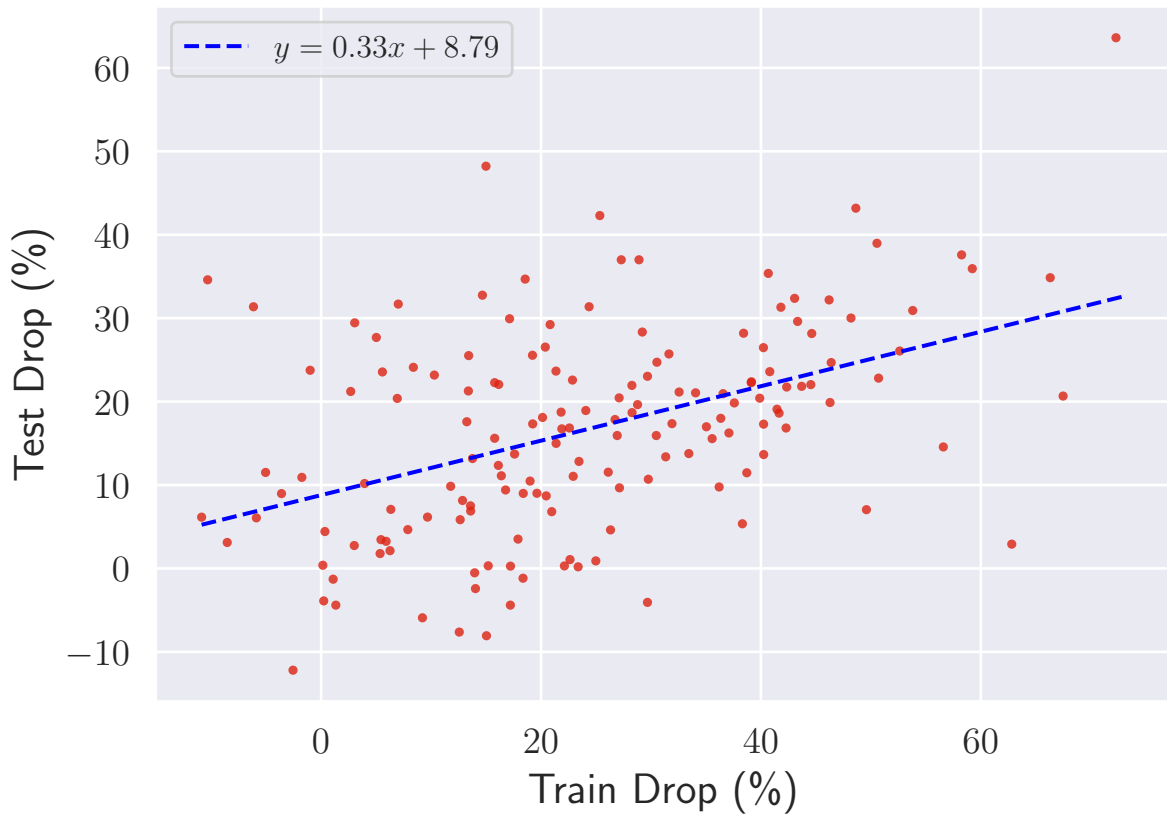

Supplement: supplementary_material [file attachment]

great white shark (91.23%) → **sea; reef;** (63.89%)

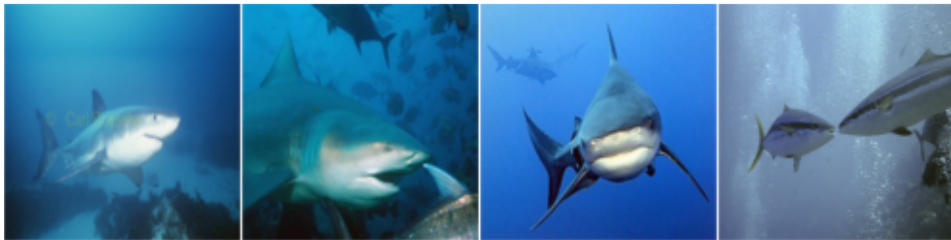

great white shark (91.23%) → **diver; underwater; aquarium;** (70.00%)

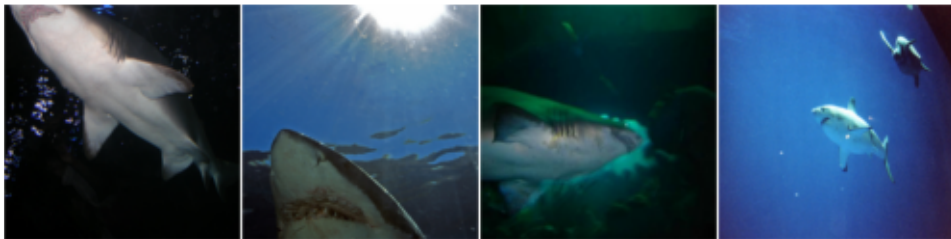

Supplement: supplementary_material [file attachment]

snake (92.31%) → **woman**; (56.25%)

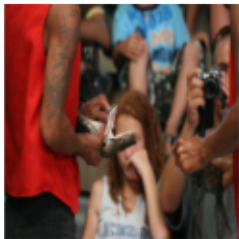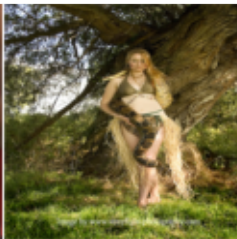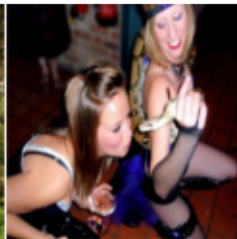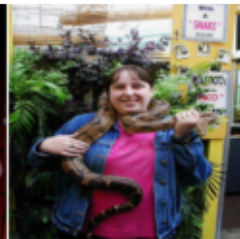

snake (92.31%) → **catch; stand**; (12.50%)

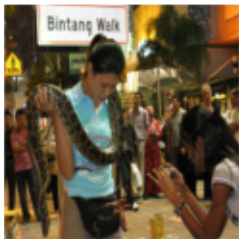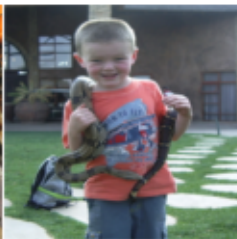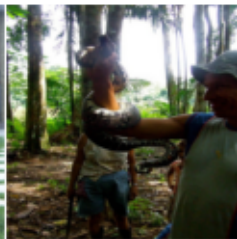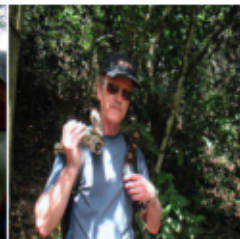

Supplement: supplementary_material [file attachment]

ape + **branch** (69.23%)

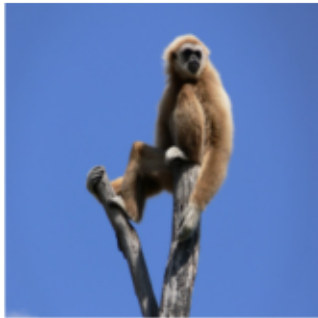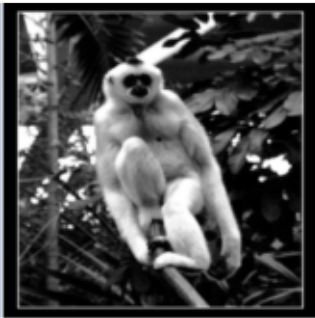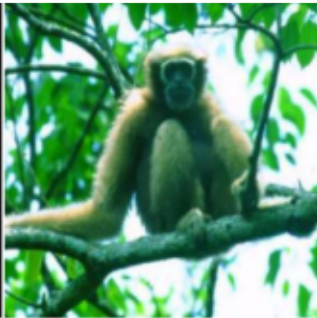

Supplement: supplementary_material [file attachment]

Similarity Score Distribution → AUROC: 0.85

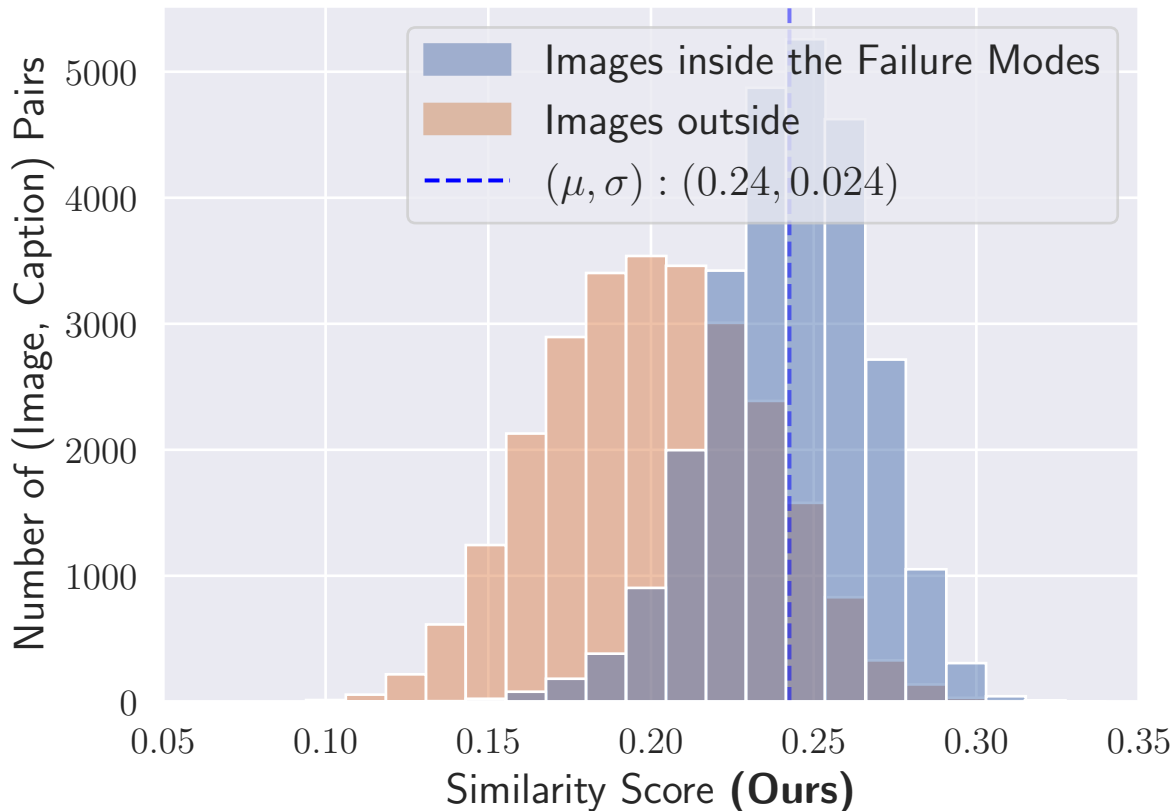

Supplement: supplementary_material [file attachment]

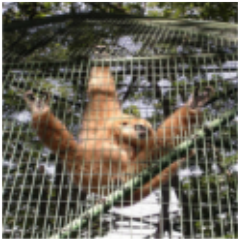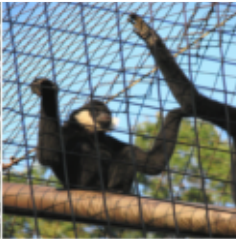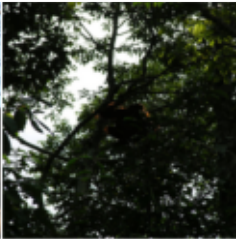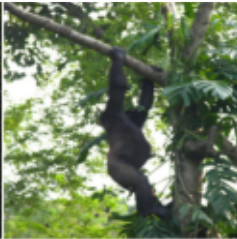

Supplement: supplementary_material [file attachment]

# Living17 ( $s = 50, a = 30\%$ )

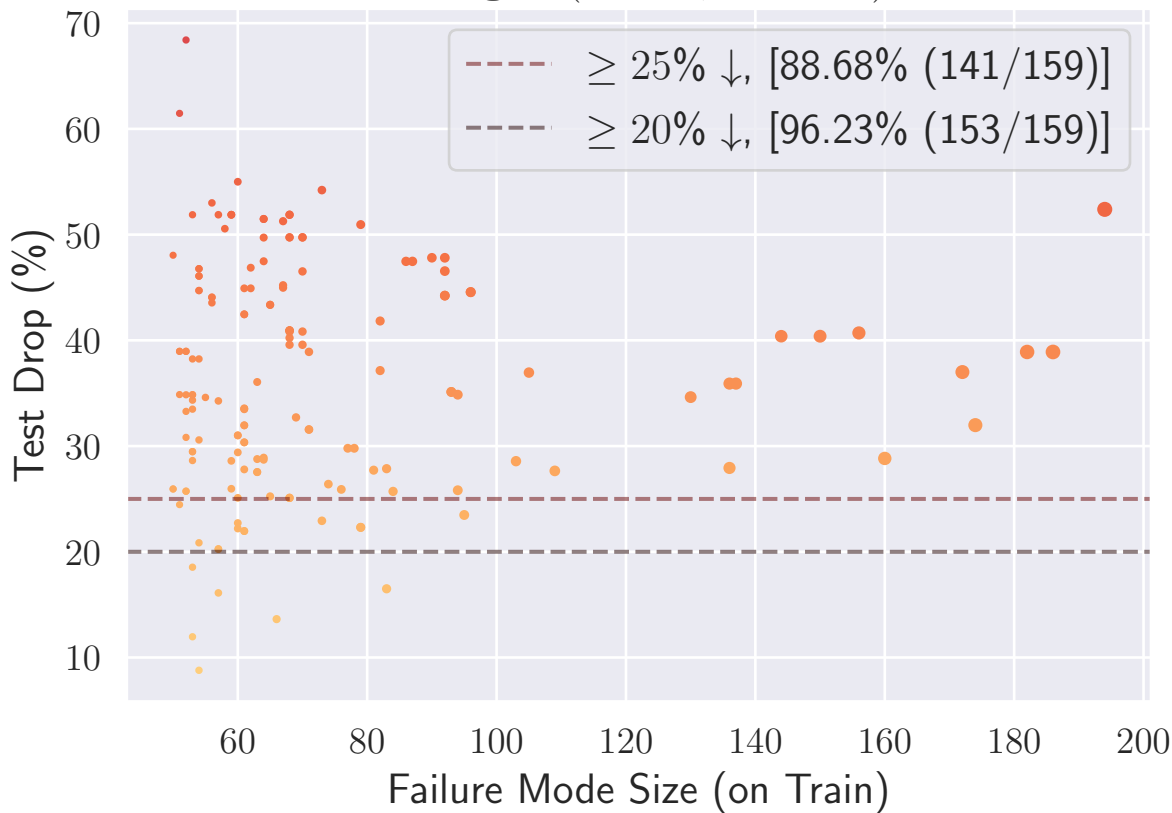

Supplement: supplementary_material [file attachment]

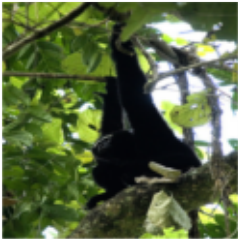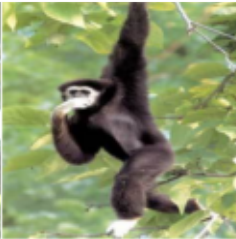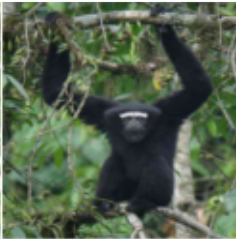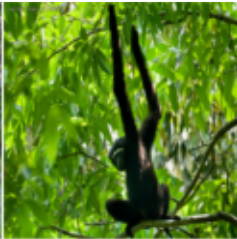

Supplement: supplementary_material [file attachment]

# ImageNet ( $s = 30, a = 25\%$ )

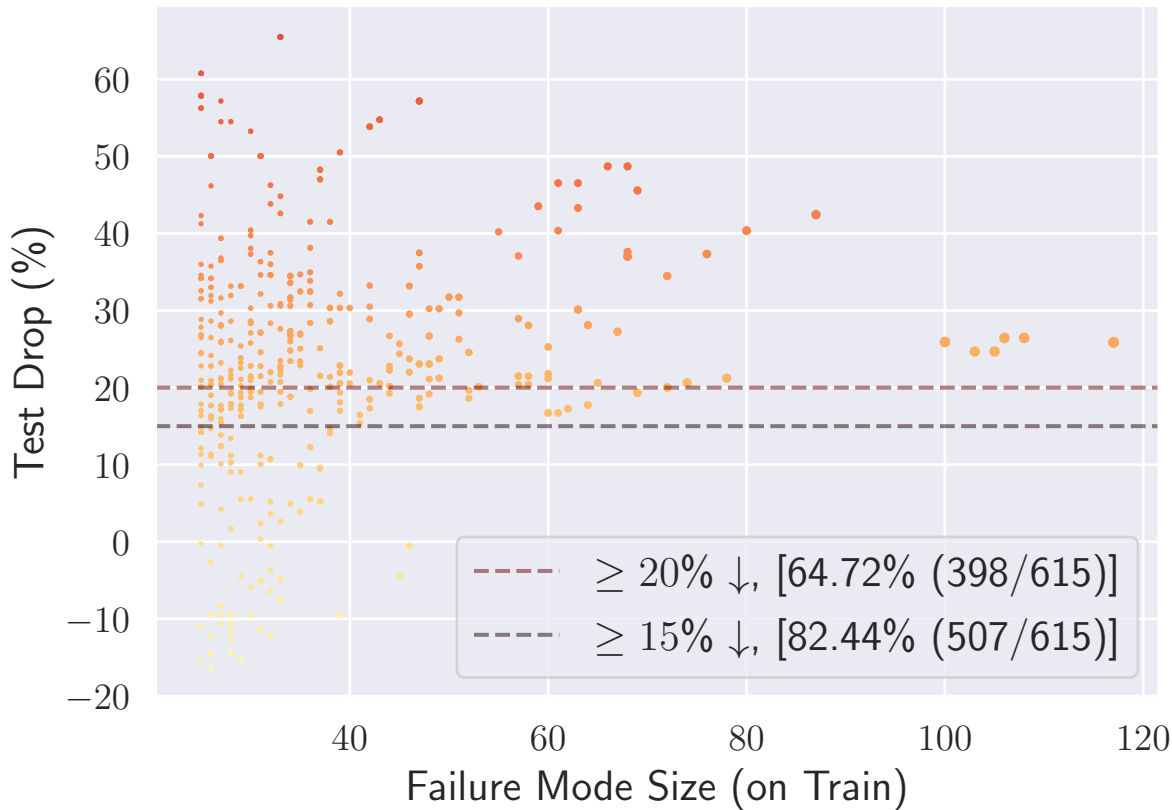

Supplement: supplementary_material [file attachment]

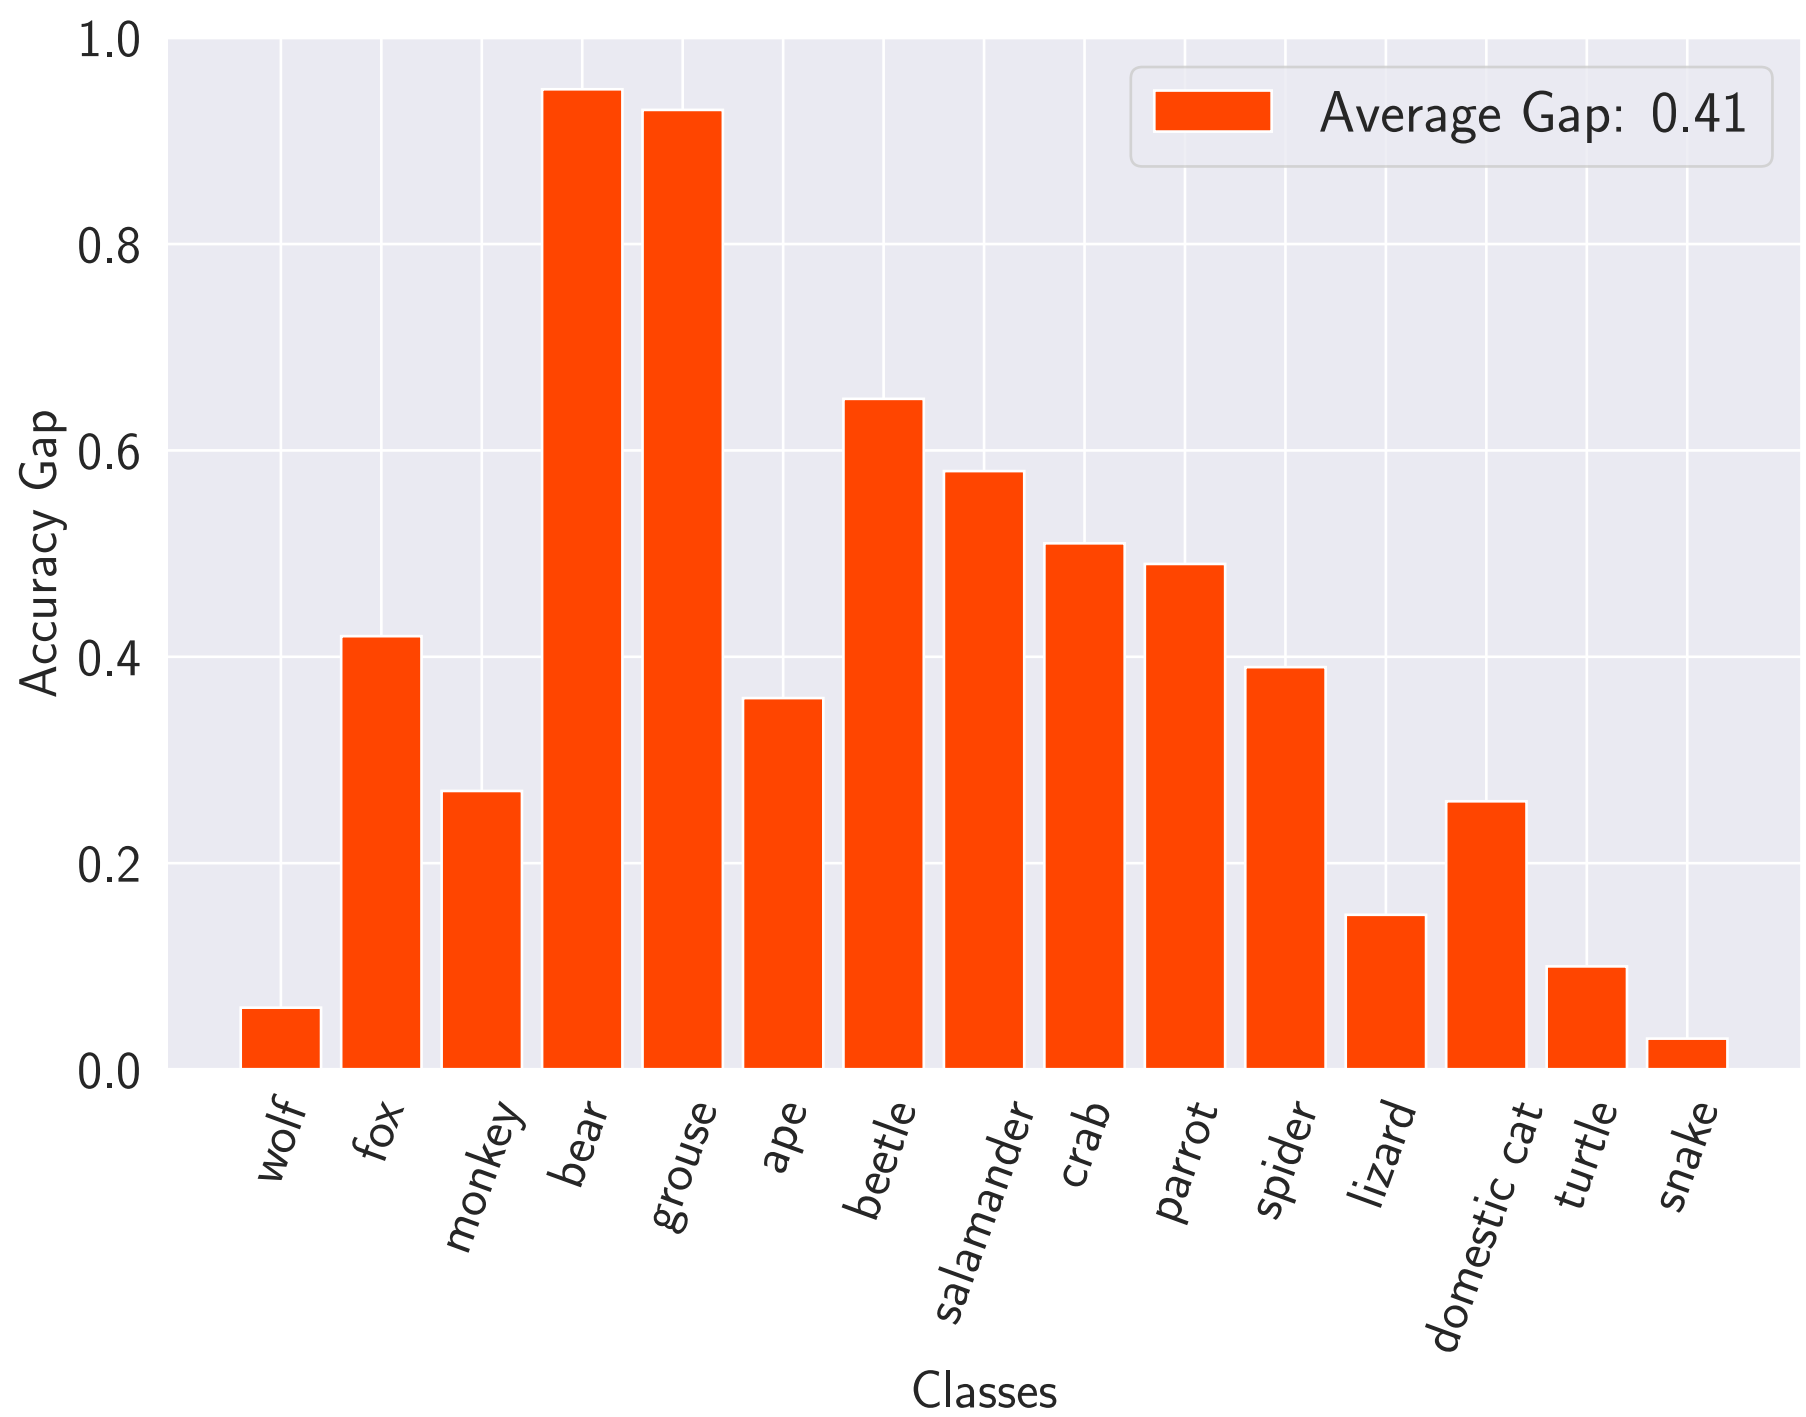

Supplement: supplementary_material [file attachment]

ape (86.23%)

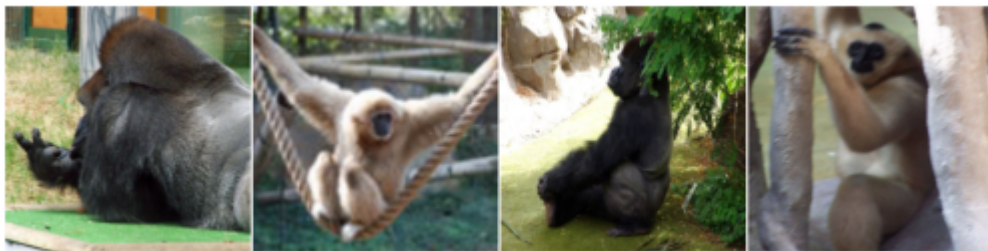

ape + **hang** (70.09%)

ape + **black** (73.21%)

ape + **branch** (69.23%)

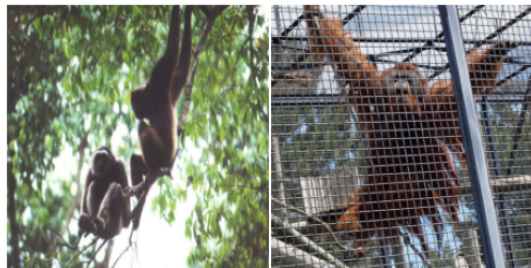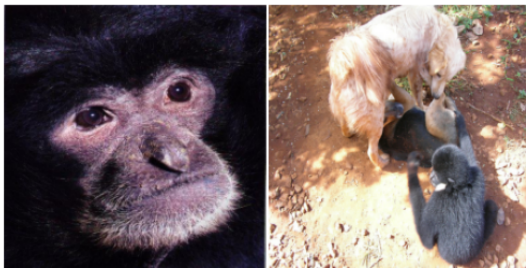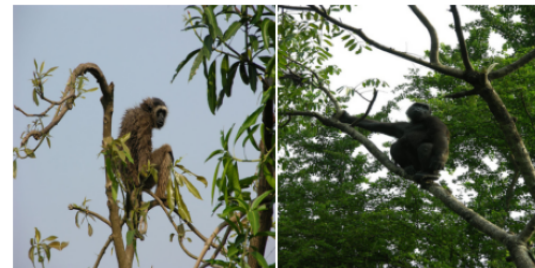

ape + **hang** + **branch** + **black** (41.88%)

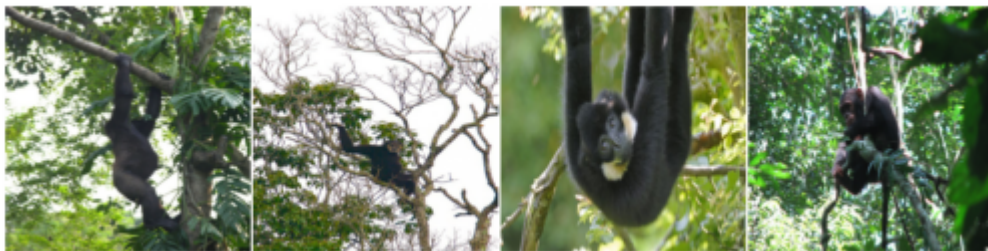

*All 3 Tags* →

Supplement: supplementary_material [file attachment]

fox + **white** + **zoo** (35.29%)

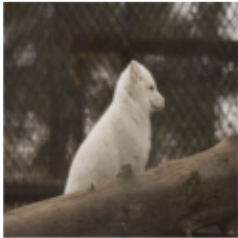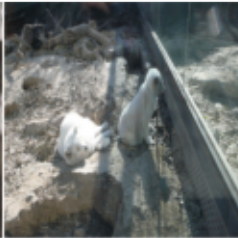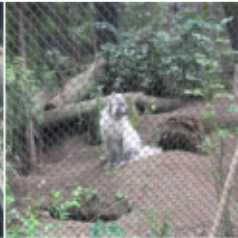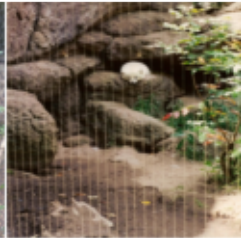

Supplement: supplementary_material [file attachment]

old (80.90%) → **smile; girl; (50.79%)**

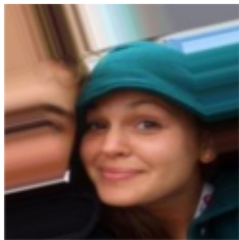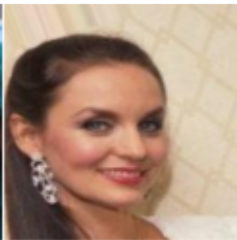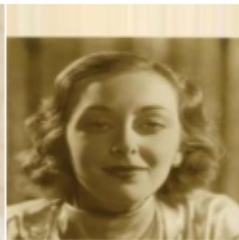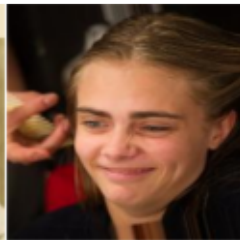

old (80.90%) → **brown; woman; brunette; (40.00%)**

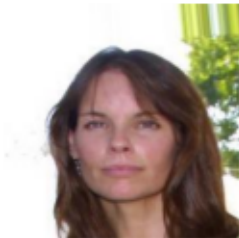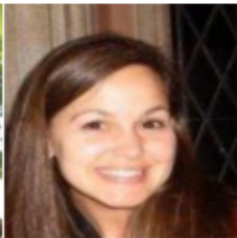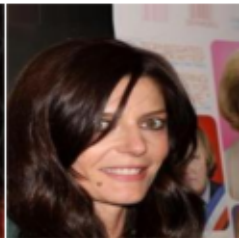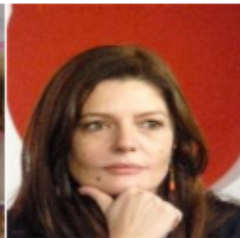

Supplement: supplementary_material [file attachment]

# Living17 ( $s = 30, a = 30\%$ )

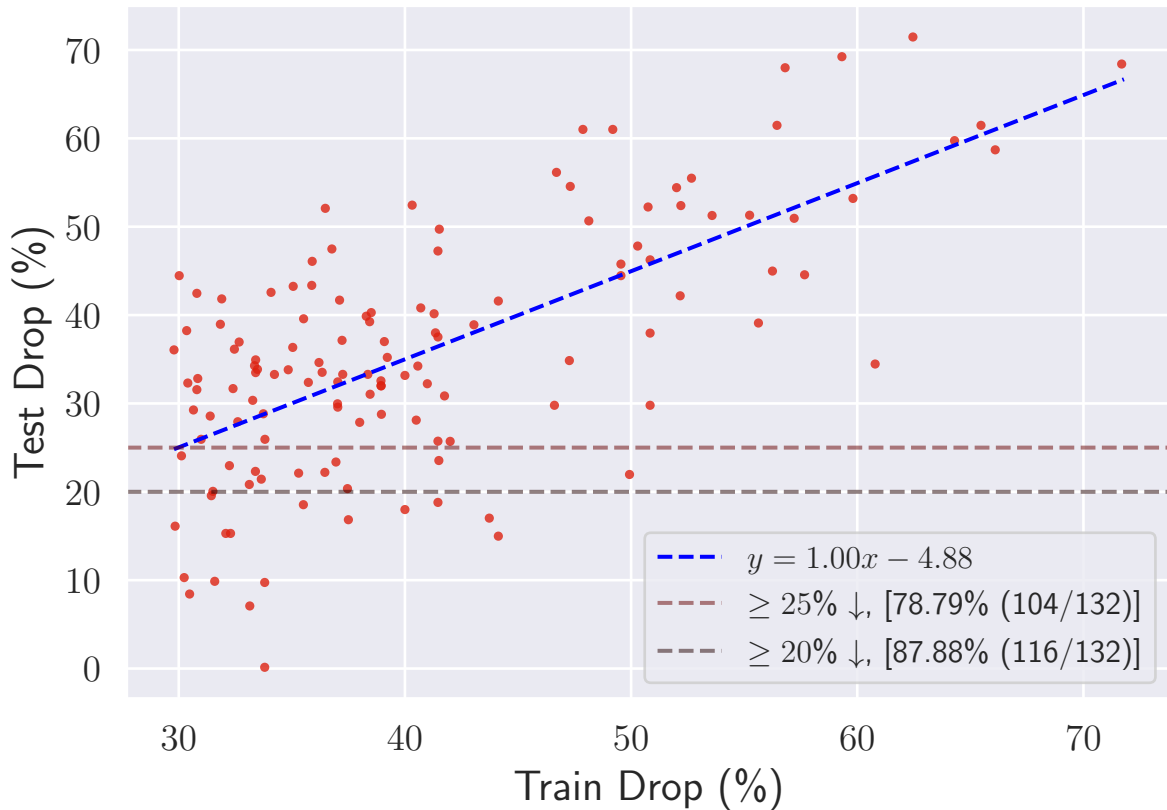

Supplement: supplementary_material [file attachment]

parrot (93.85%) → **lush; grass; grassy; field;** (40.74%)

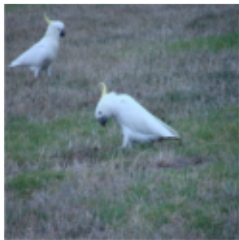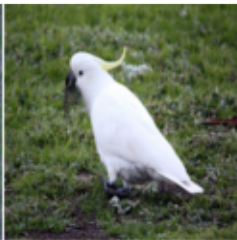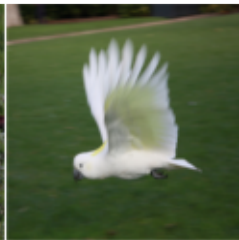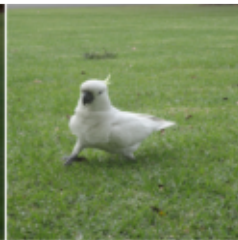

parrot (93.85%) → **pigeon;** (51.28%)

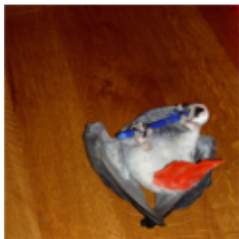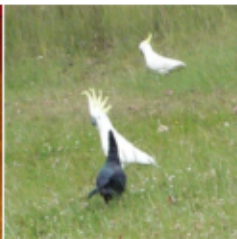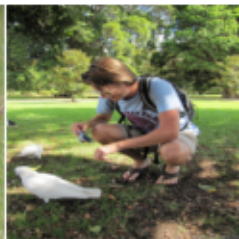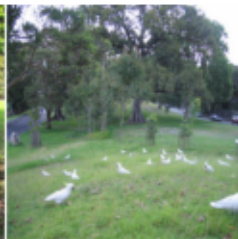

Supplement: supplementary_material [file attachment]

## CelebA (DOMINO)

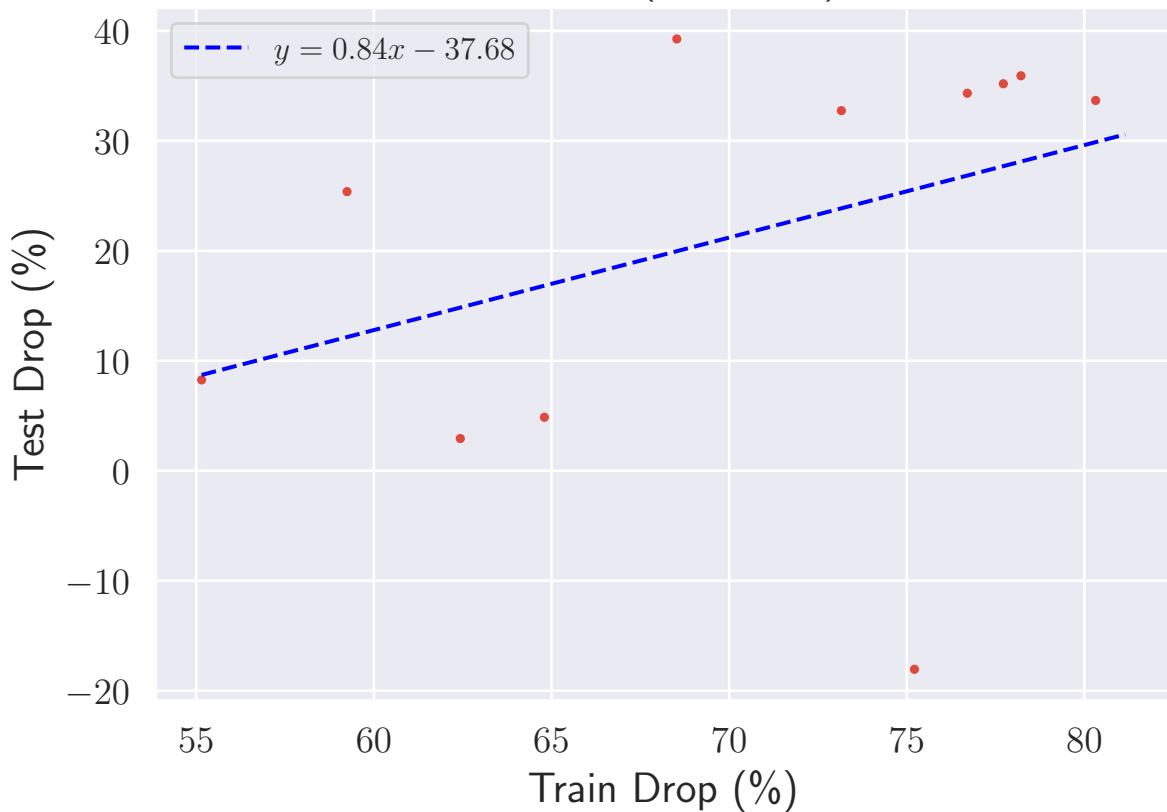

Supplement: supplementary_material [file attachment]

## Living17

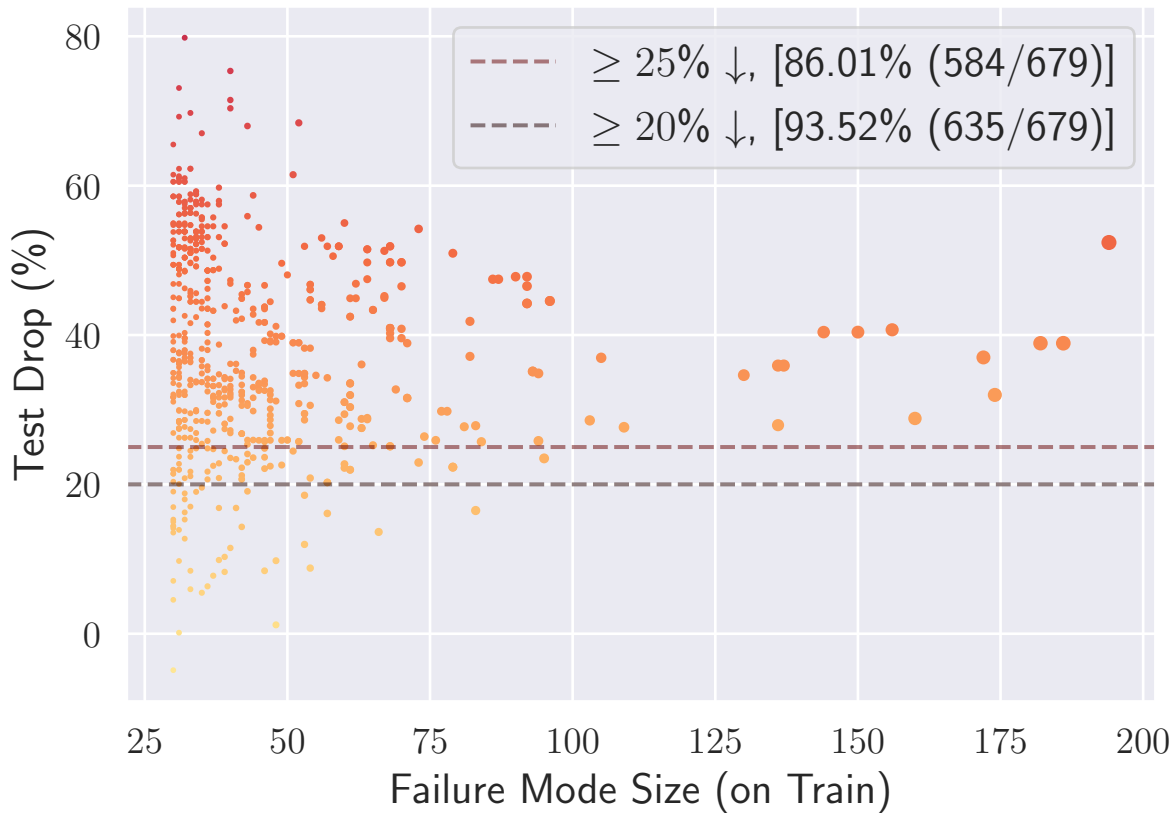

Supplement: supplementary_material [file attachment]

Similarity Score Distribution → AUROC: 0.75

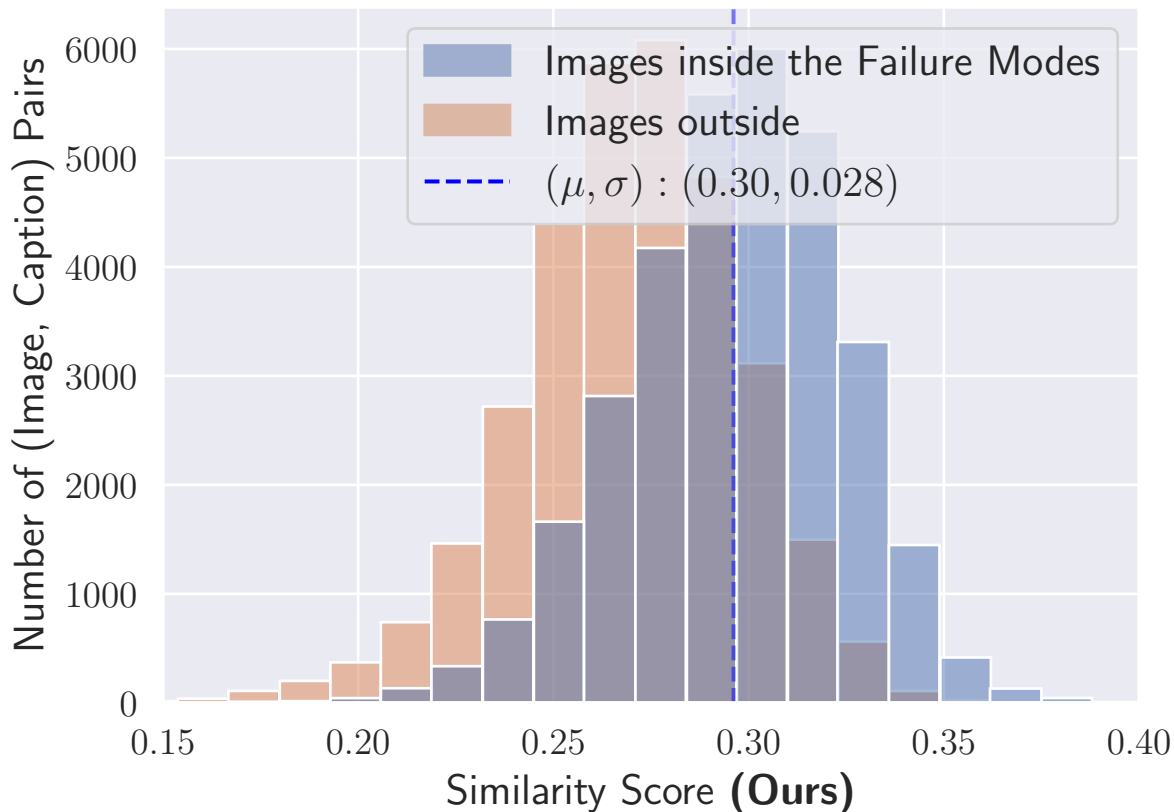

Supplement: supplementary_material [file attachment]

fox (81.96%) → **white; zoo; (35.29%)**

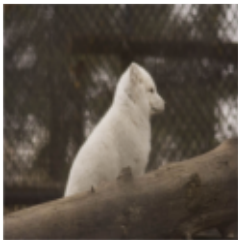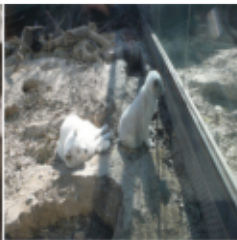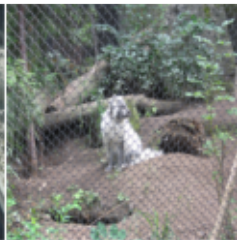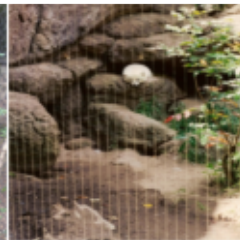

fox (81.96%) → **grass; stand; field; dry; (47.83%)**

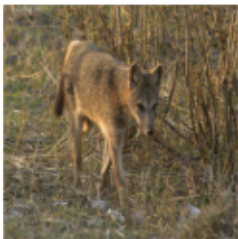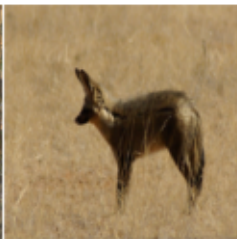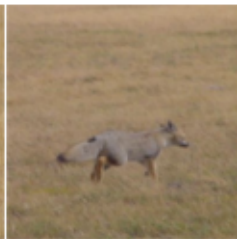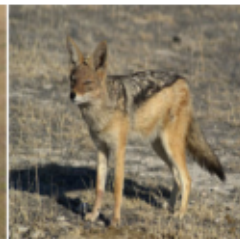

Supplement: supplementary_material [file attachment]

fox + **grass** + **stand** + **field** + **dry** (47.83%)

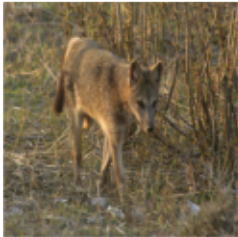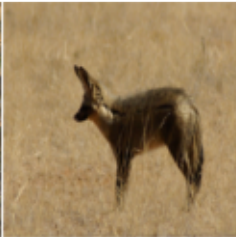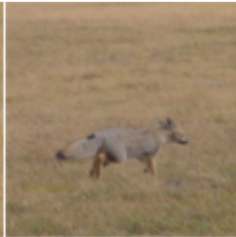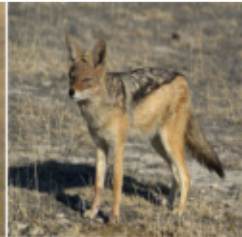

Supplement: supplementary_material [file attachment]

tailed frog (78.62%) → **green; swamp; (57.50%)**

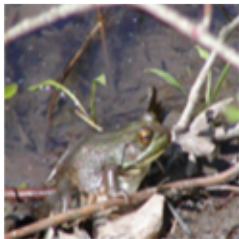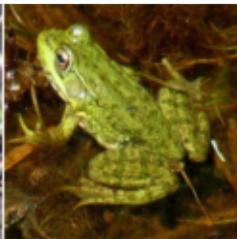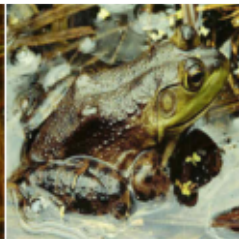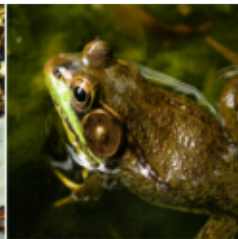

tailed frog (78.62%) → **sit; leaf; hide; plant; (57.69%)**

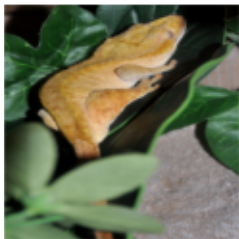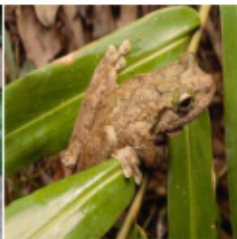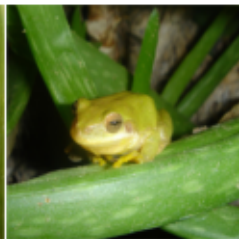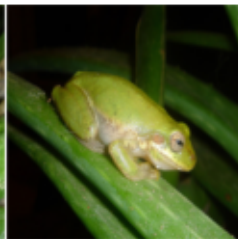

Supplement: supplementary_material [file attachment]

fox (81.96%)

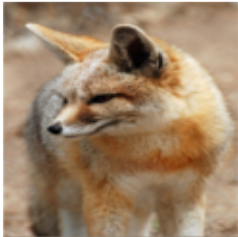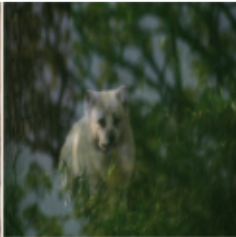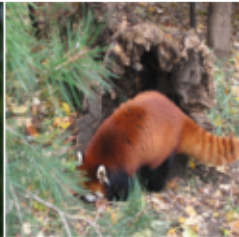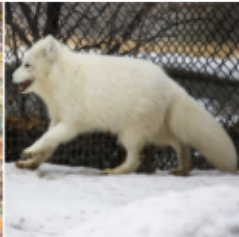

Supplement: supplementary_material [file attachment]

# Entity13 ( $s = 200, a = 25\%$ )

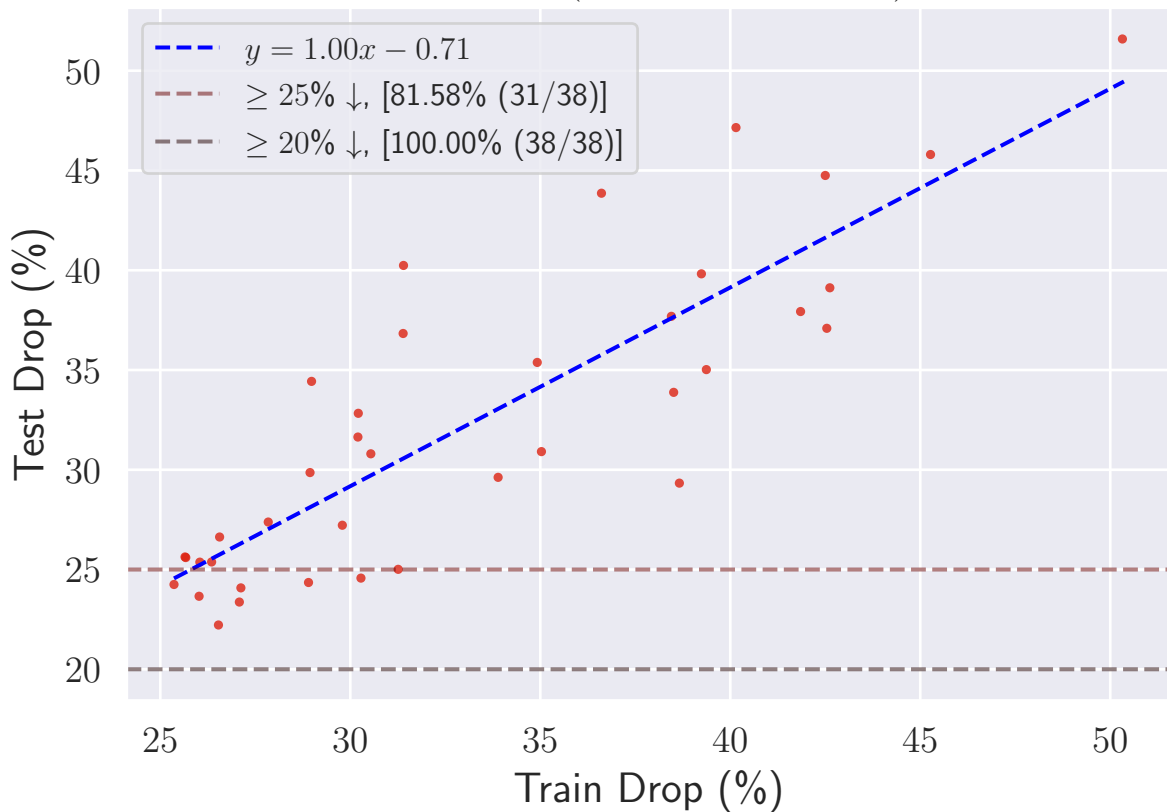

Supplement: supplementary_material [file attachment]

ape + **black** (73.21%)

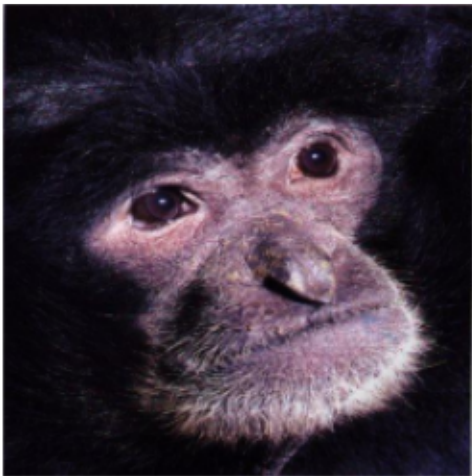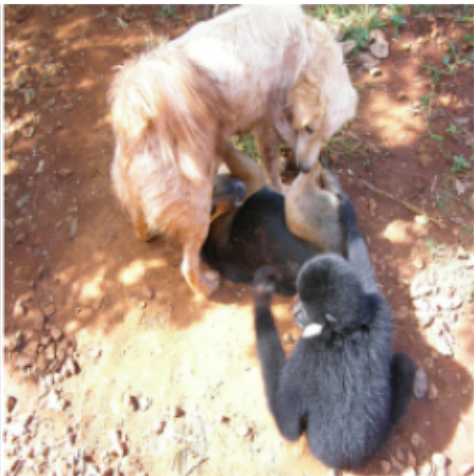

Supplement: supplementary_material [file attachment]

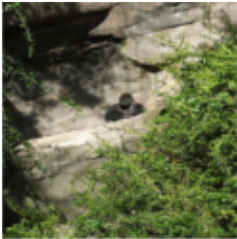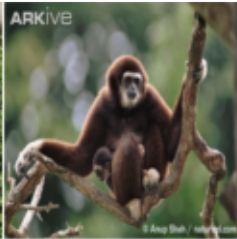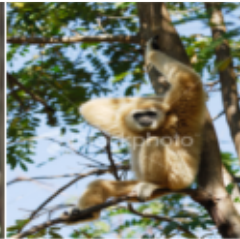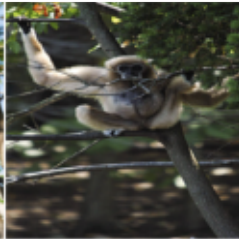

Supplement: supplementary_material [file attachment]

## ***Existing Methods***

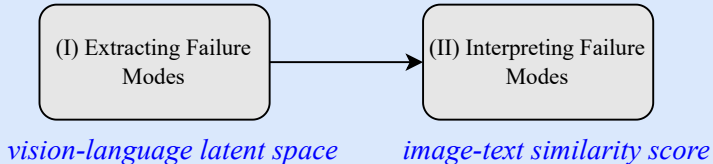

## ***PRIME***

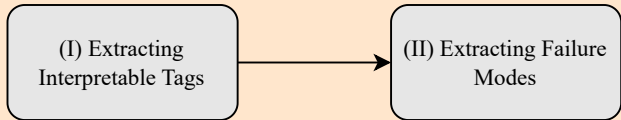

Supplement: supplementary_material [file attachment]

# Living17 ( $s = 50, a = 30\%$ )

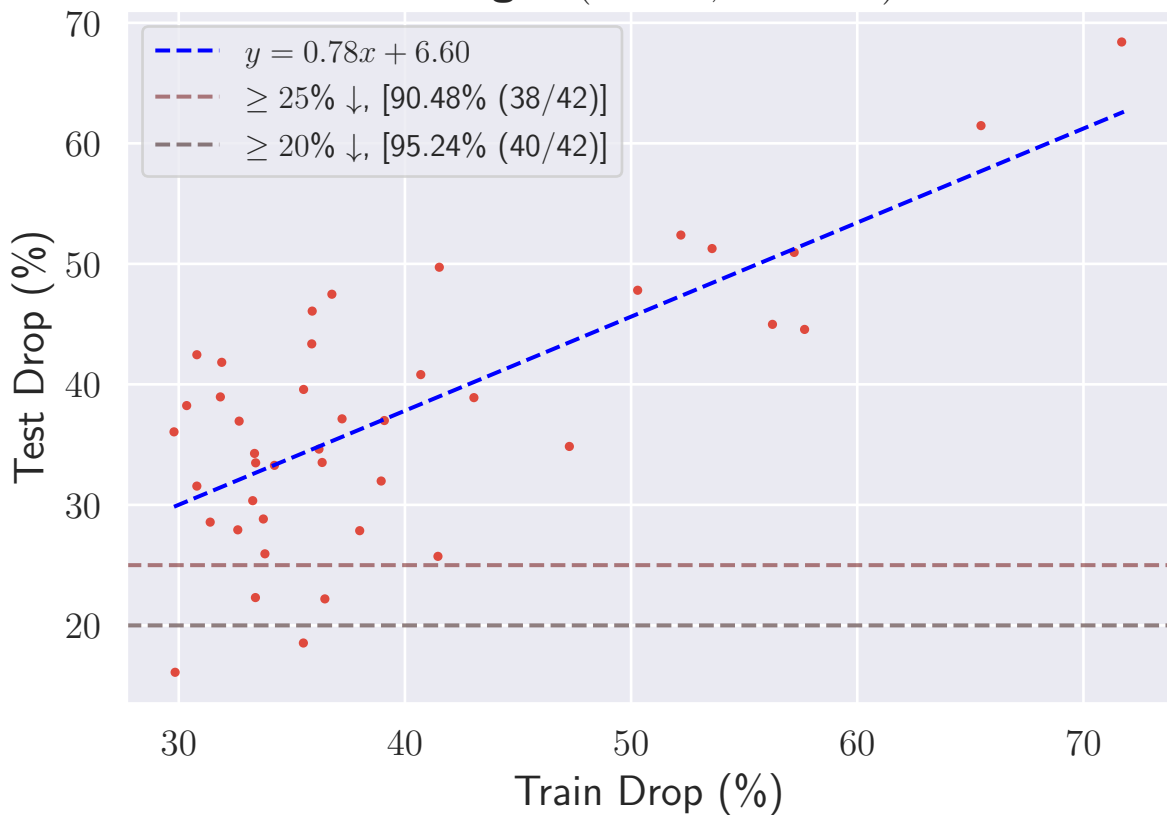

Supplement: supplementary_material [file attachment]

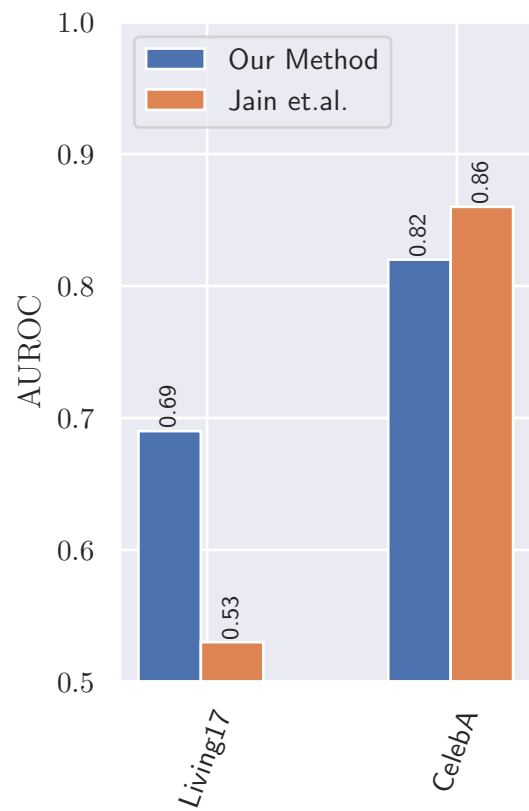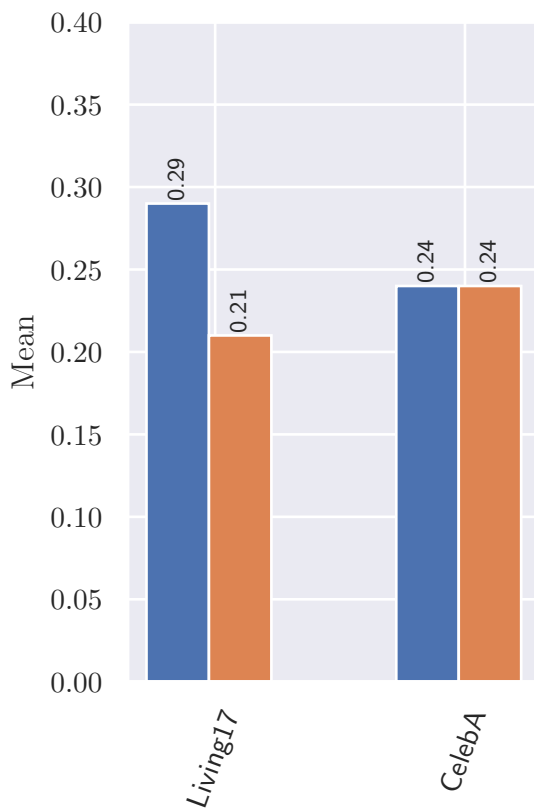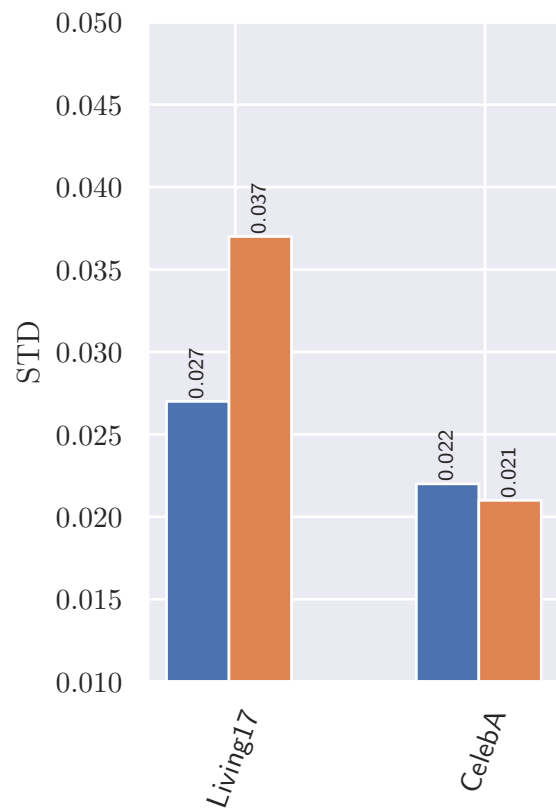

Supplement: supplementary_material [file attachment]

## Living17

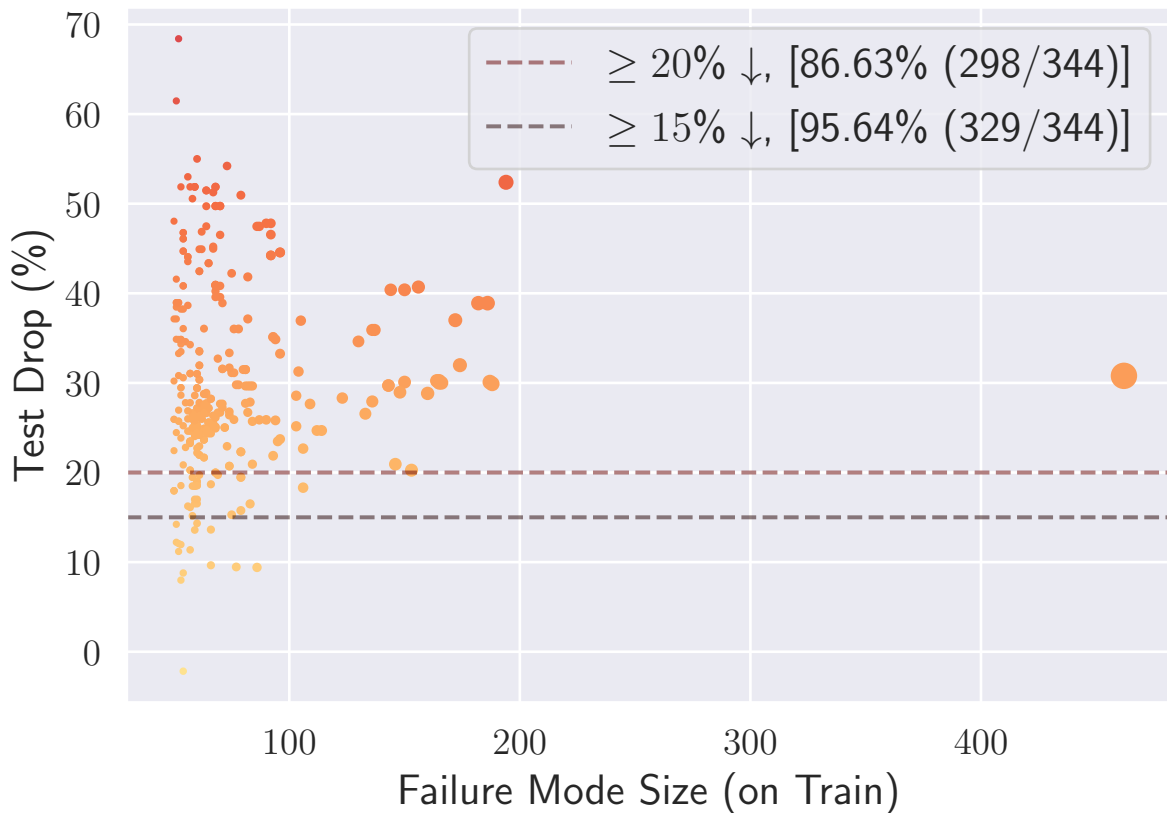

Supplement: supplementary_material [file attachment]

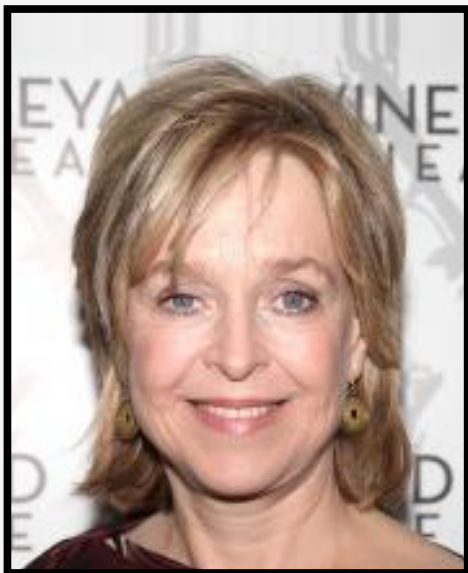

shared attributes : 10

distance : 7.64

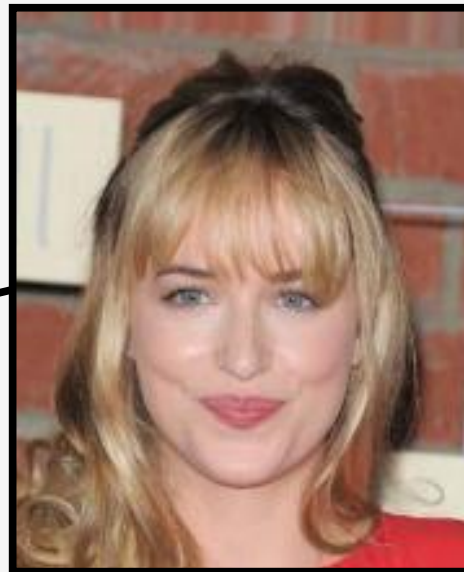

distance : 7.30

shared attributes : 3

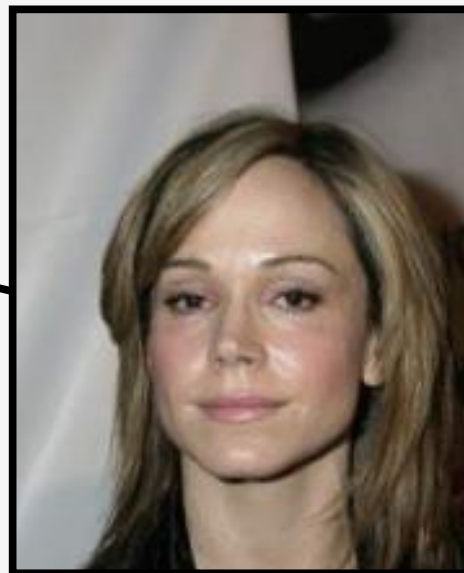

Supplement: supplementary_material [file attachment]

landbird (87.41%) → **black; water;** (69.09%)

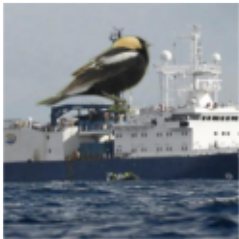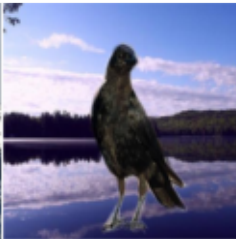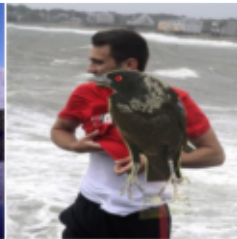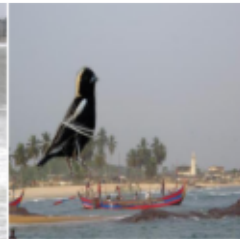

landbird (87.41%) → **water; person;** (69.86%)

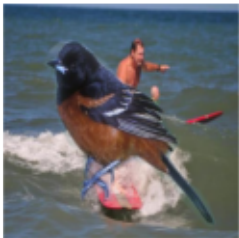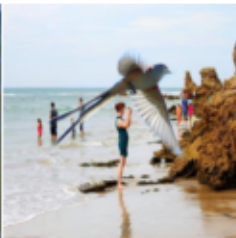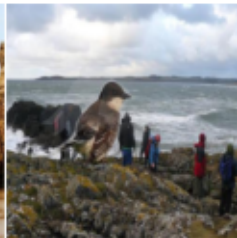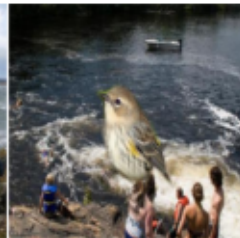

Supplement: supplementary_material [file attachment]

CelebA

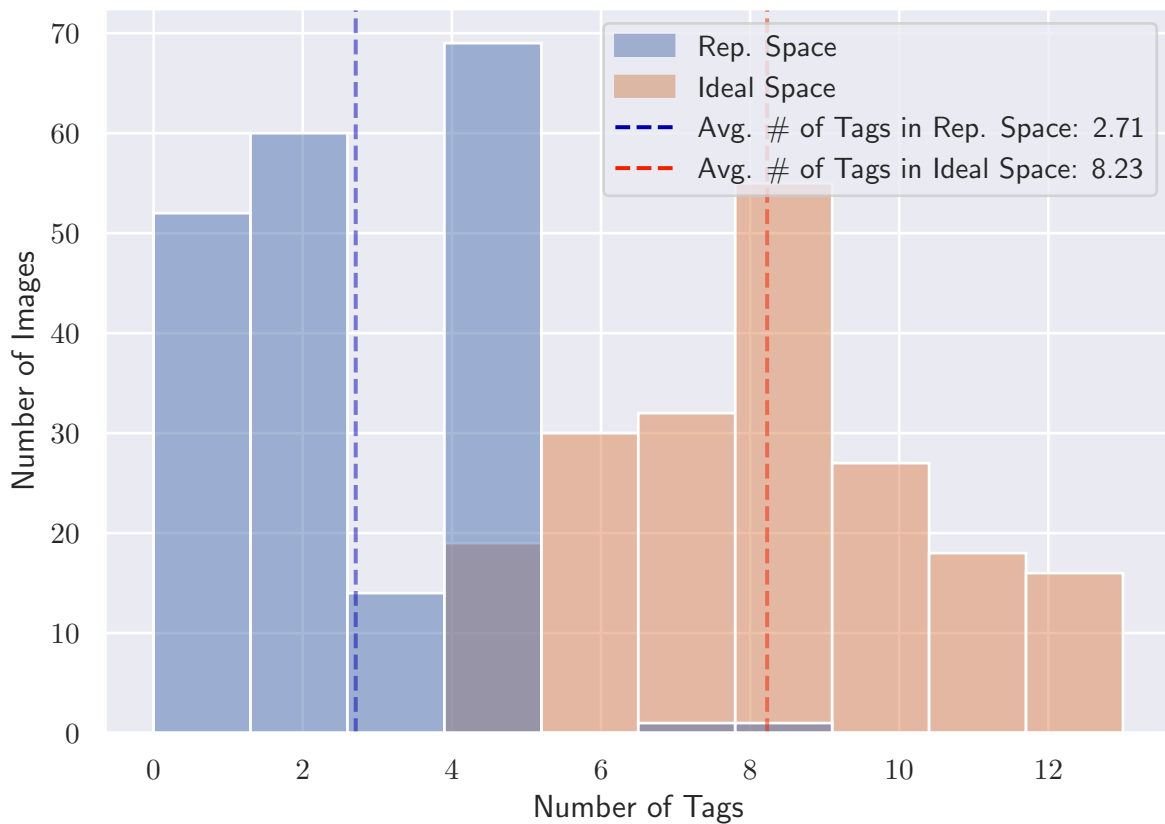

Supplement: supplementary_material [file attachment]

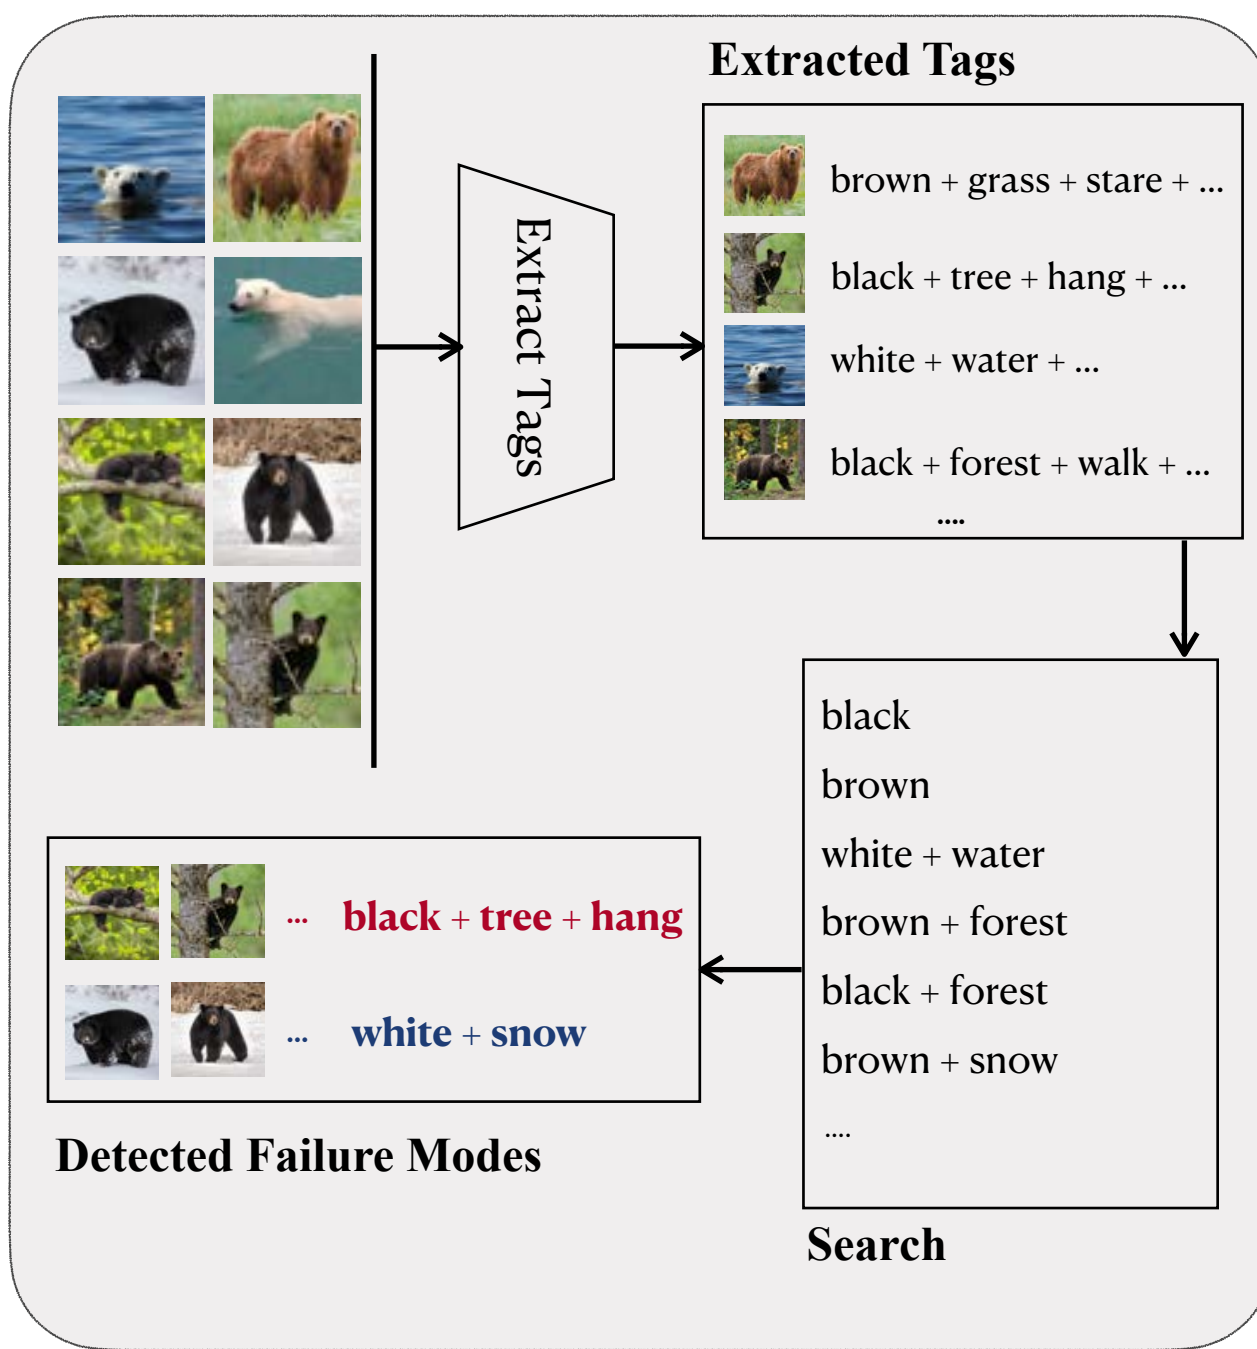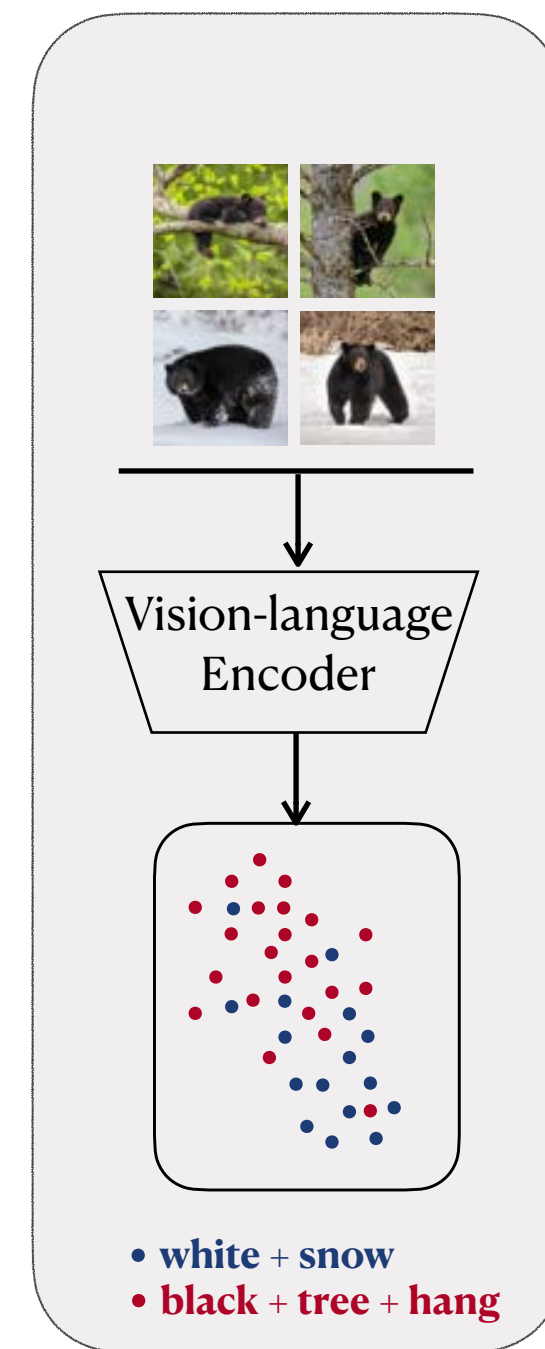

Supplement: supplementary_material [file attachment]

Similarity Score Distribution → AUROC: 0.63

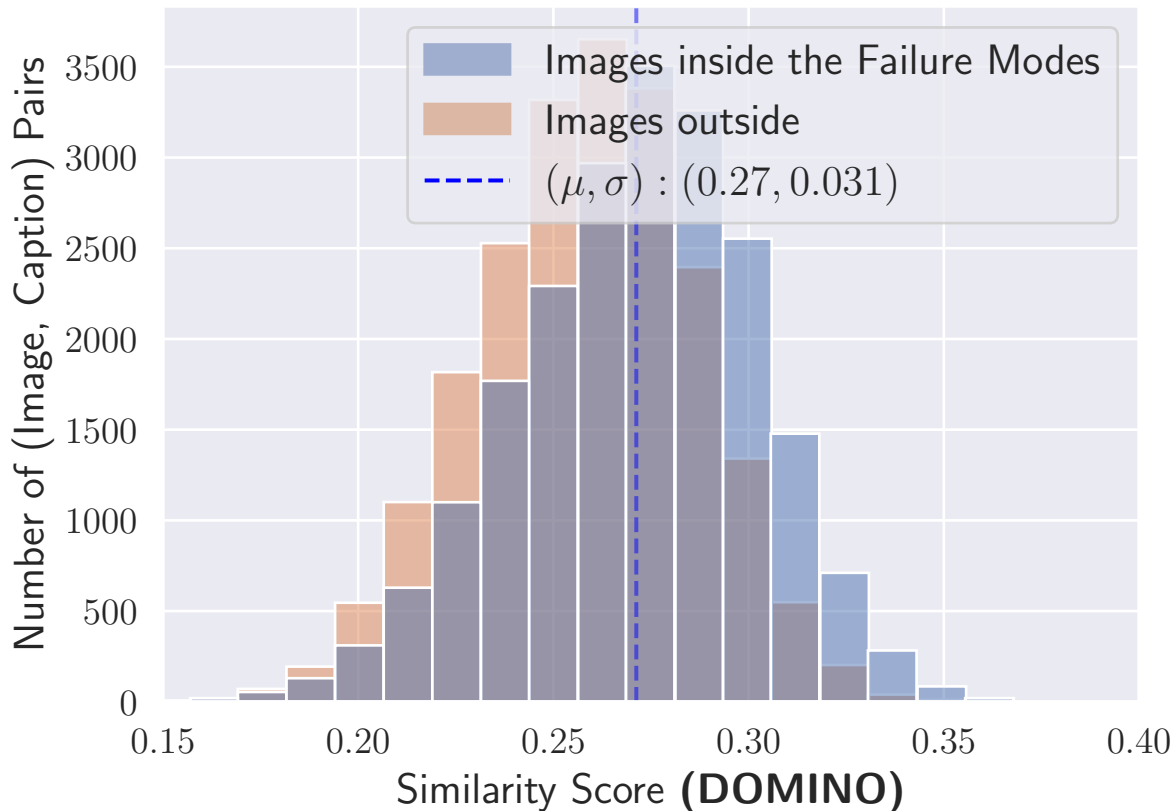

Supplement: supplementary_material [file attachment]

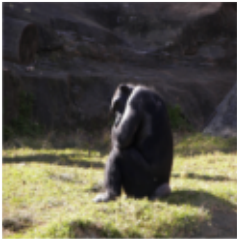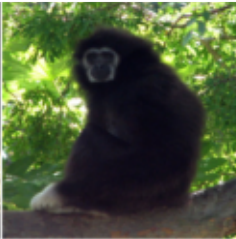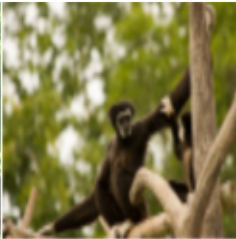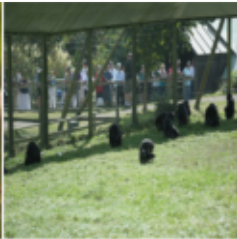

Supplement: supplementary_material [file attachment]

ape (86.23%)

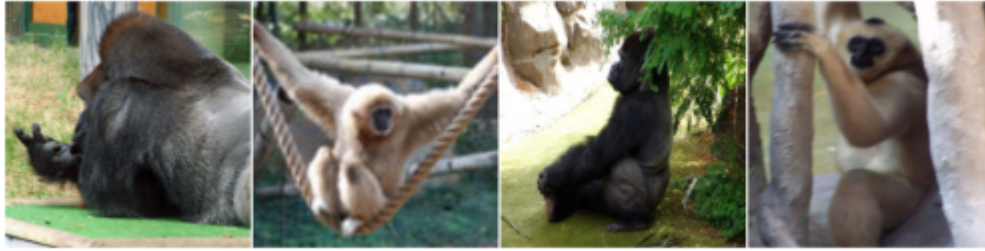

ape + **hang** (70.09%)

ape + **black** (73.21%)

ape + **branch** (69.23%)

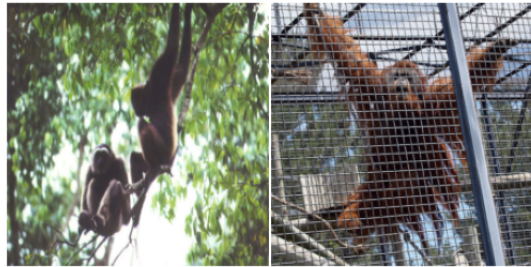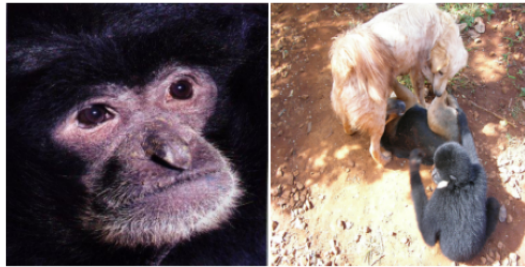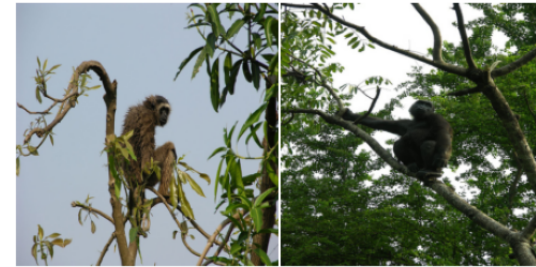

ape + **hang** + **branch** + **black** (41.88%)

*All 3 Tags* →

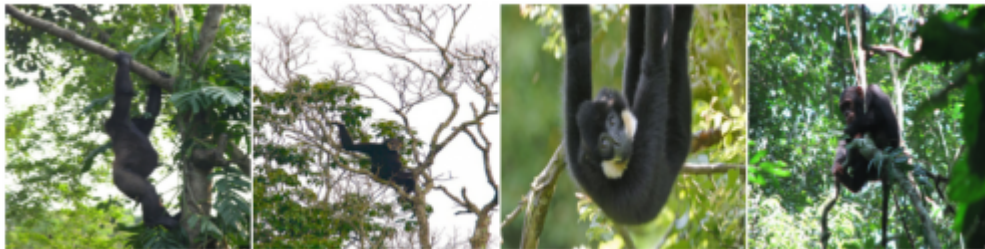

Supplement: supplementary_material [file attachment]

**ImageNet** ( $s = 30, a = 30\%$ )

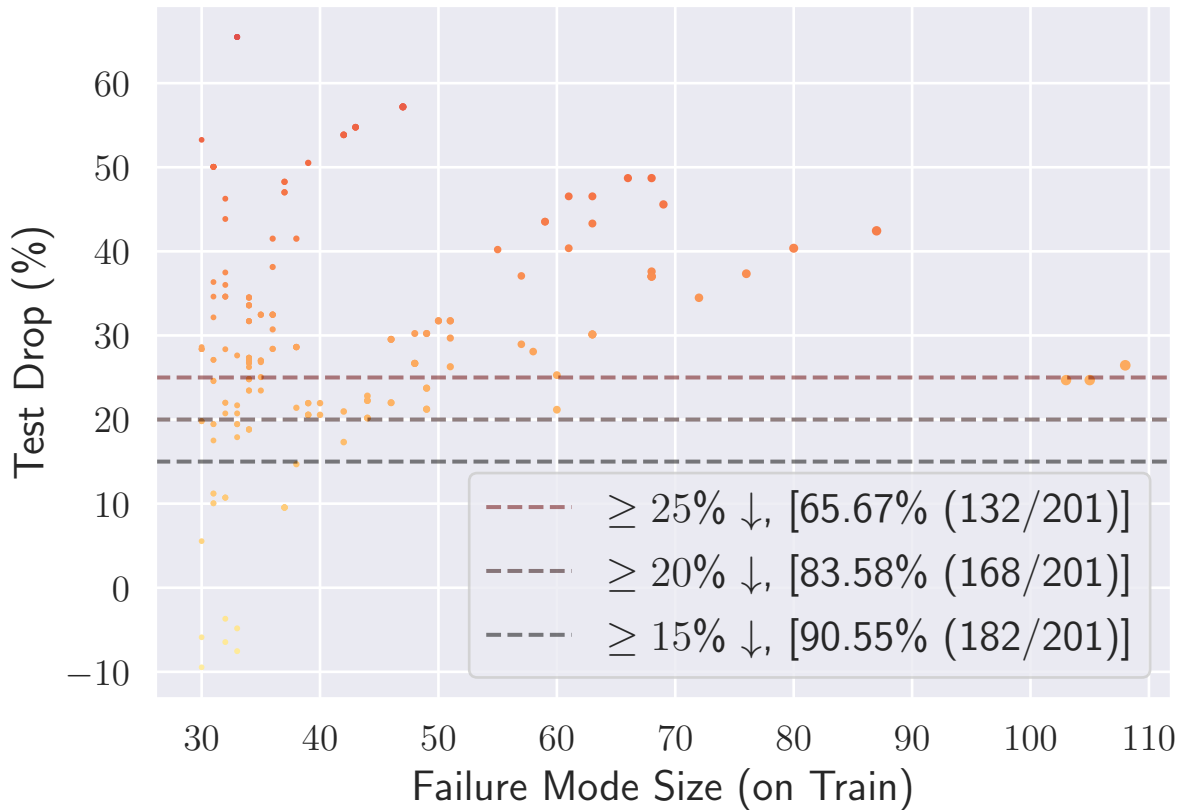

Supplement: supplementary_material [file attachment]

**CelebA** ( $s = 50, a = 30\%$ )

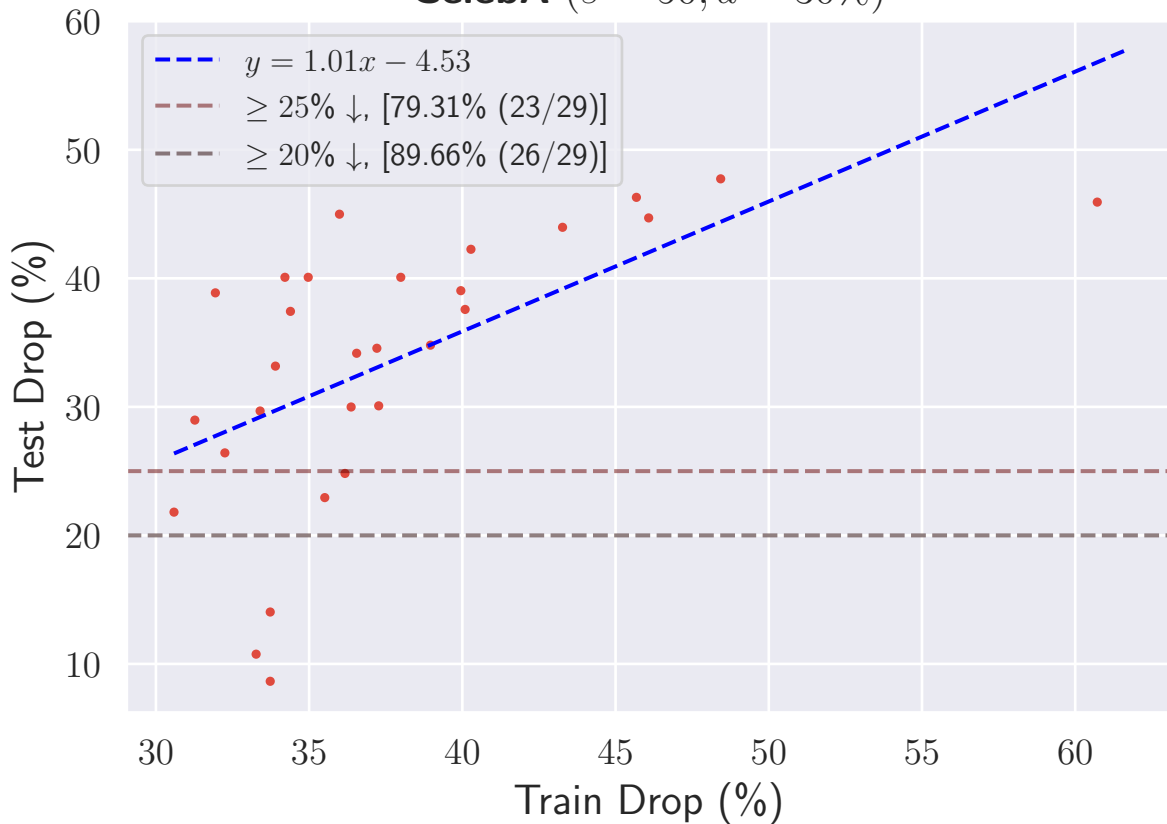

Supplement: supplementary_material [file attachment]

## Waterbirds ( $s = 35, a = 30\%$ )

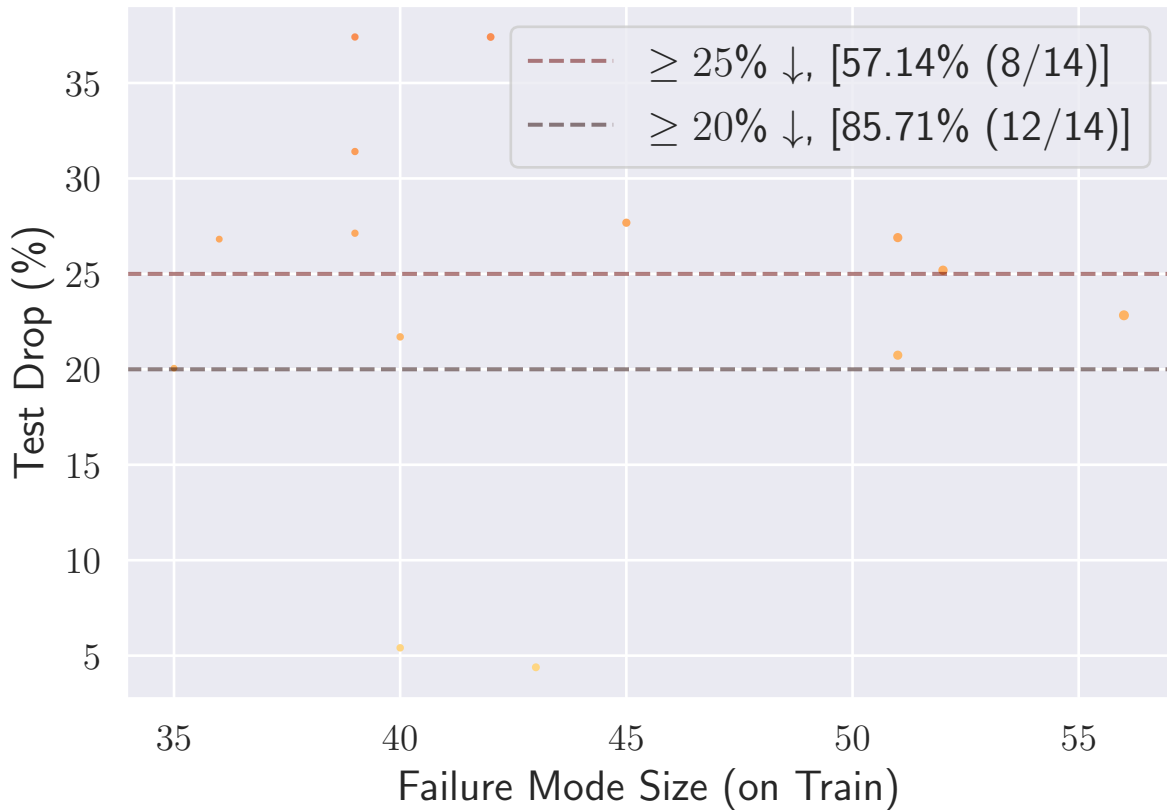

Supplement: supplementary_material [file attachment]

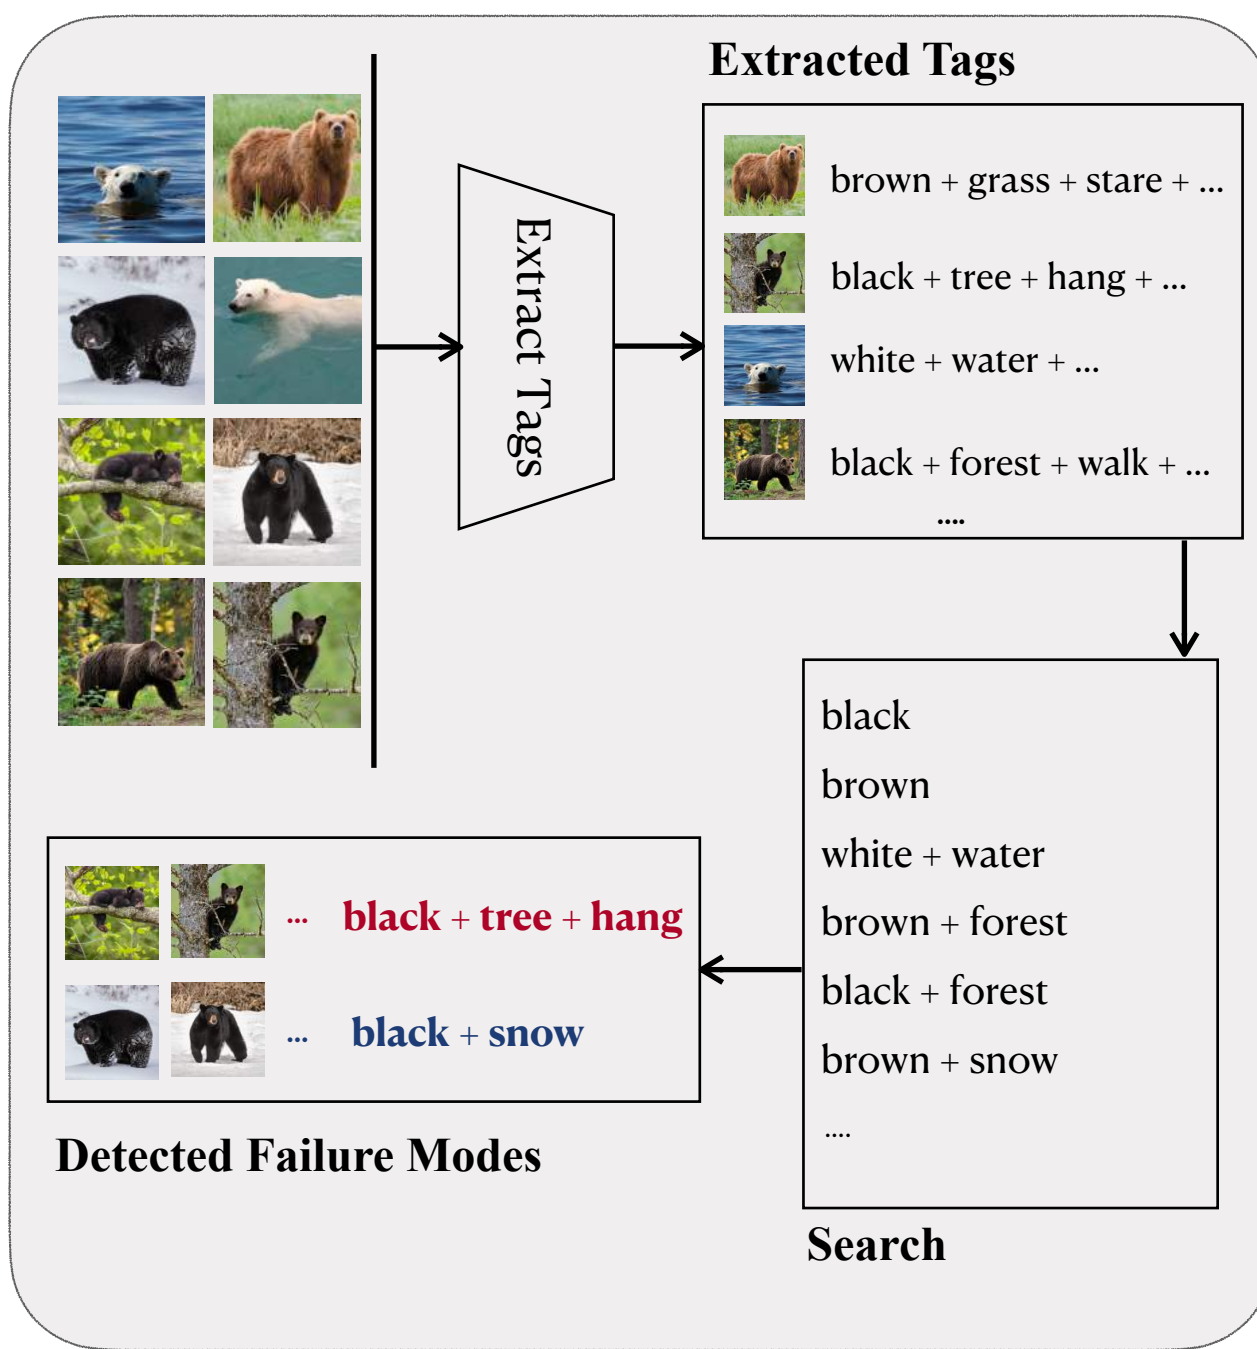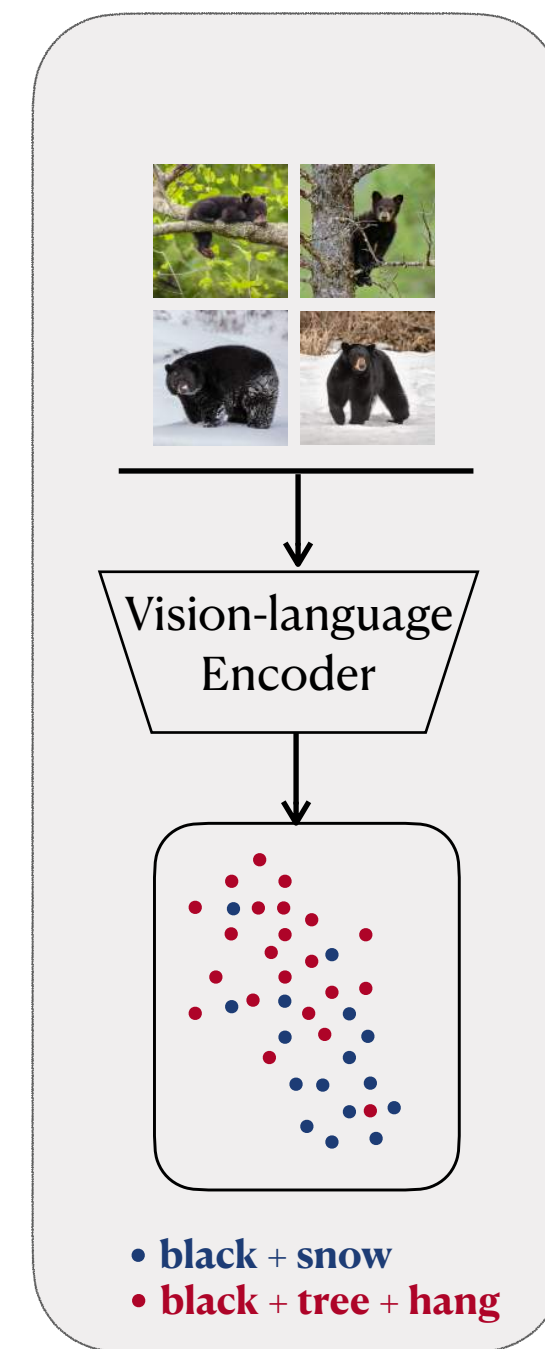

Supplement: supplementary_material [file attachment]

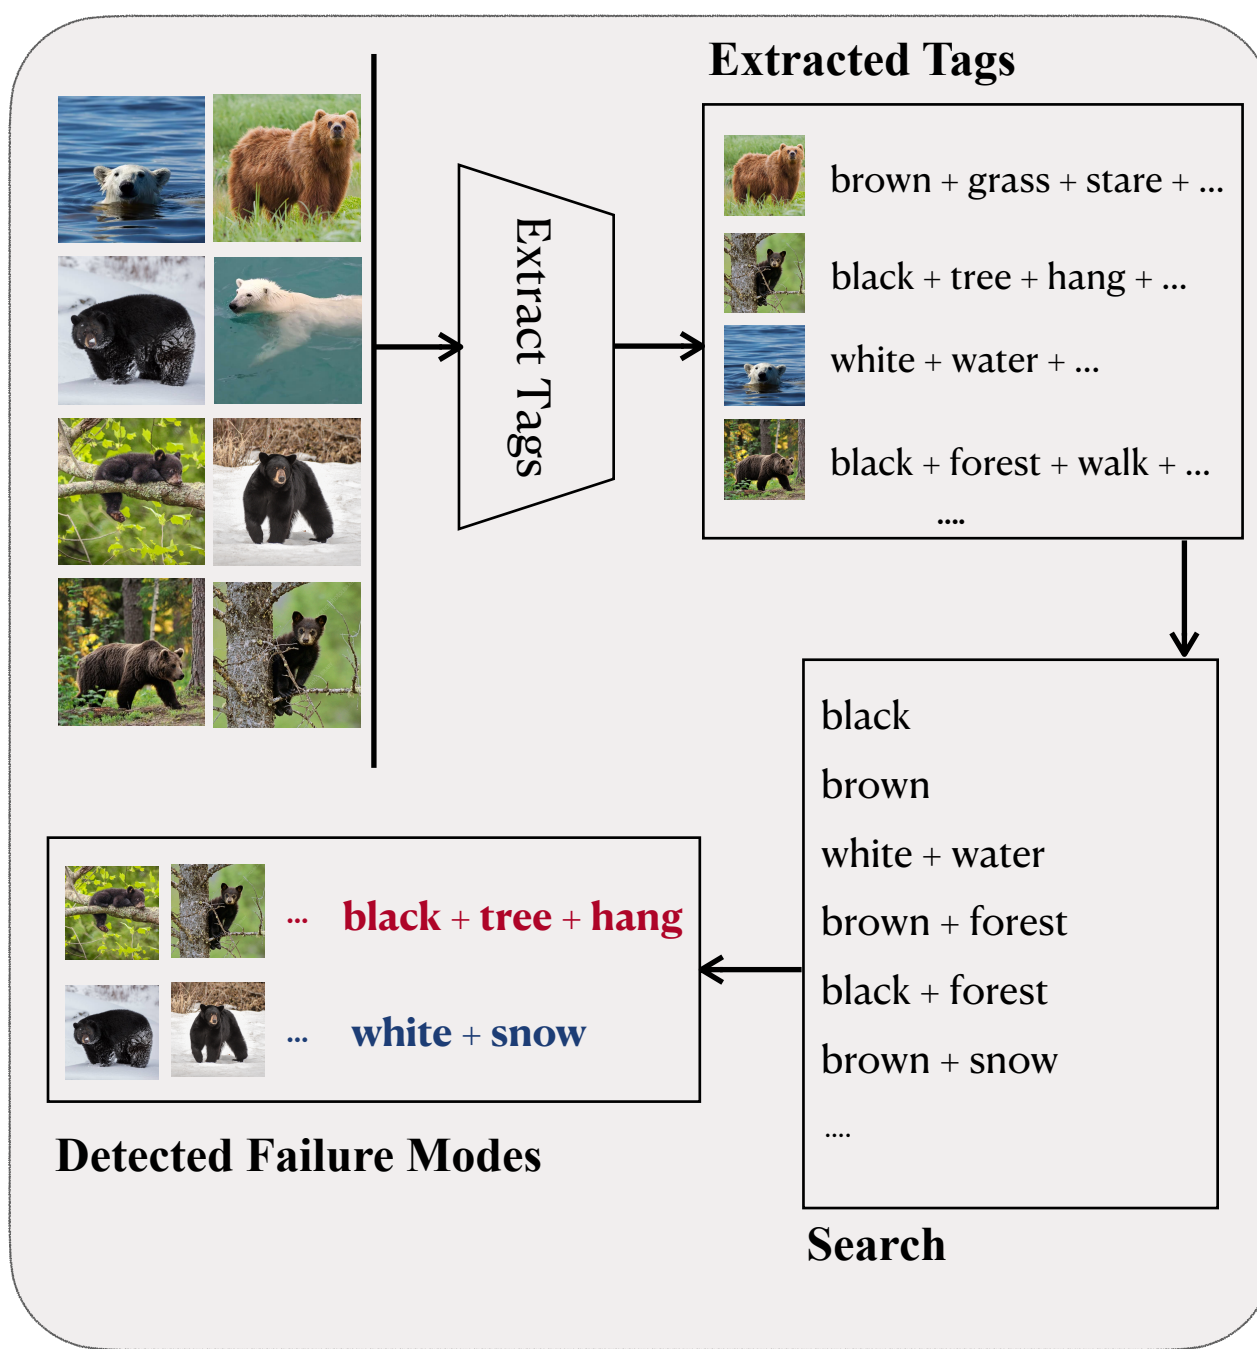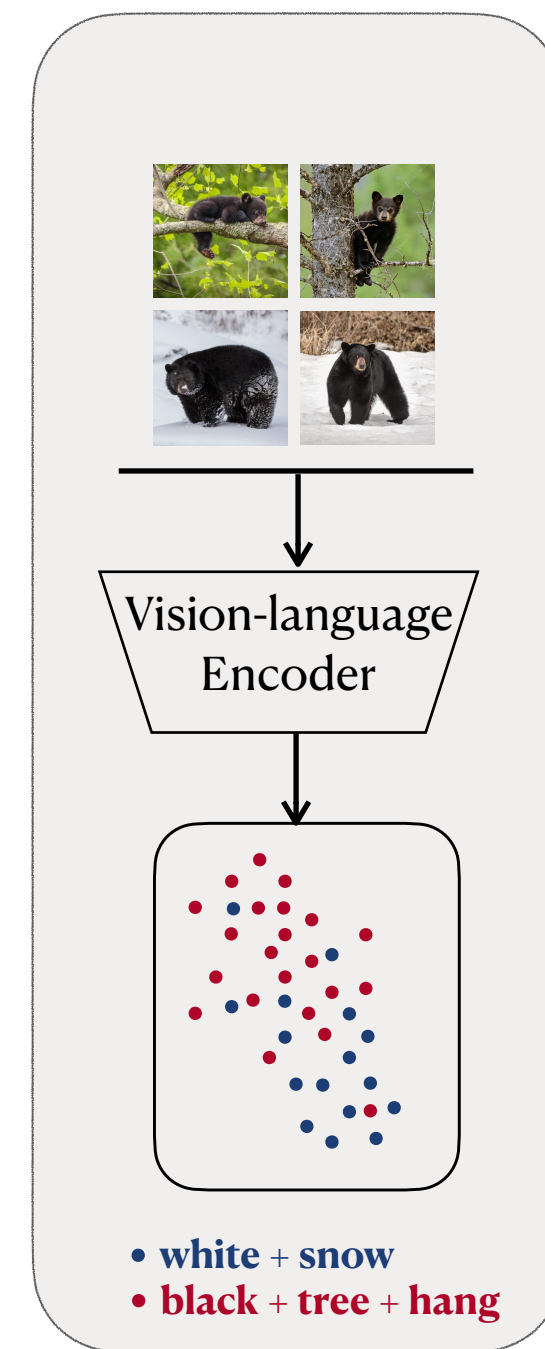

Supplement: supplementary_material [file attachment]

## Waterbirds

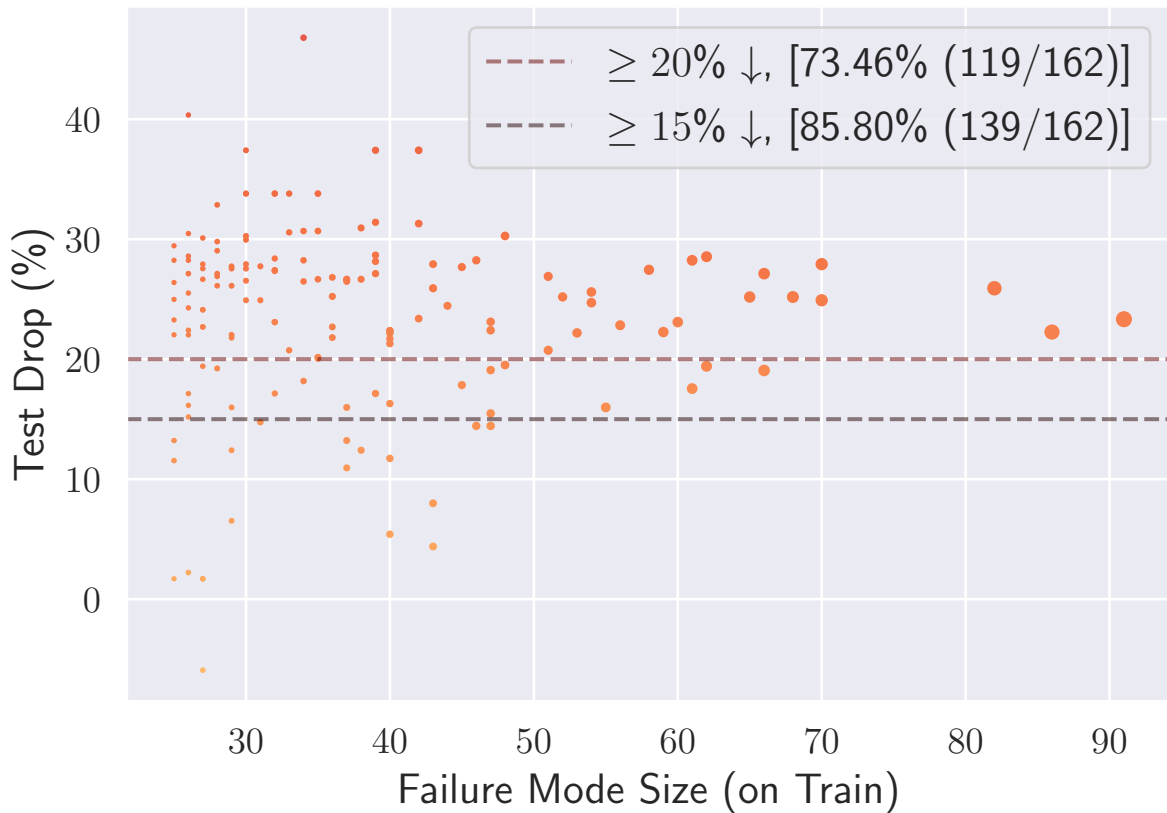

Supplement: supplementary_material [file attachment]

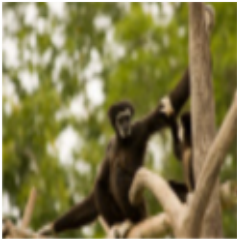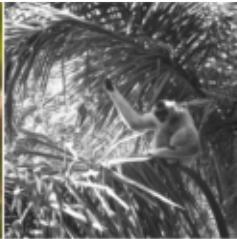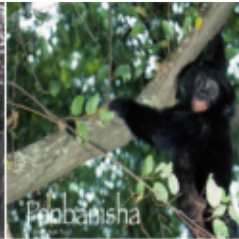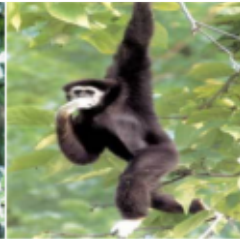

Supplement: supplementary_material [file attachment]

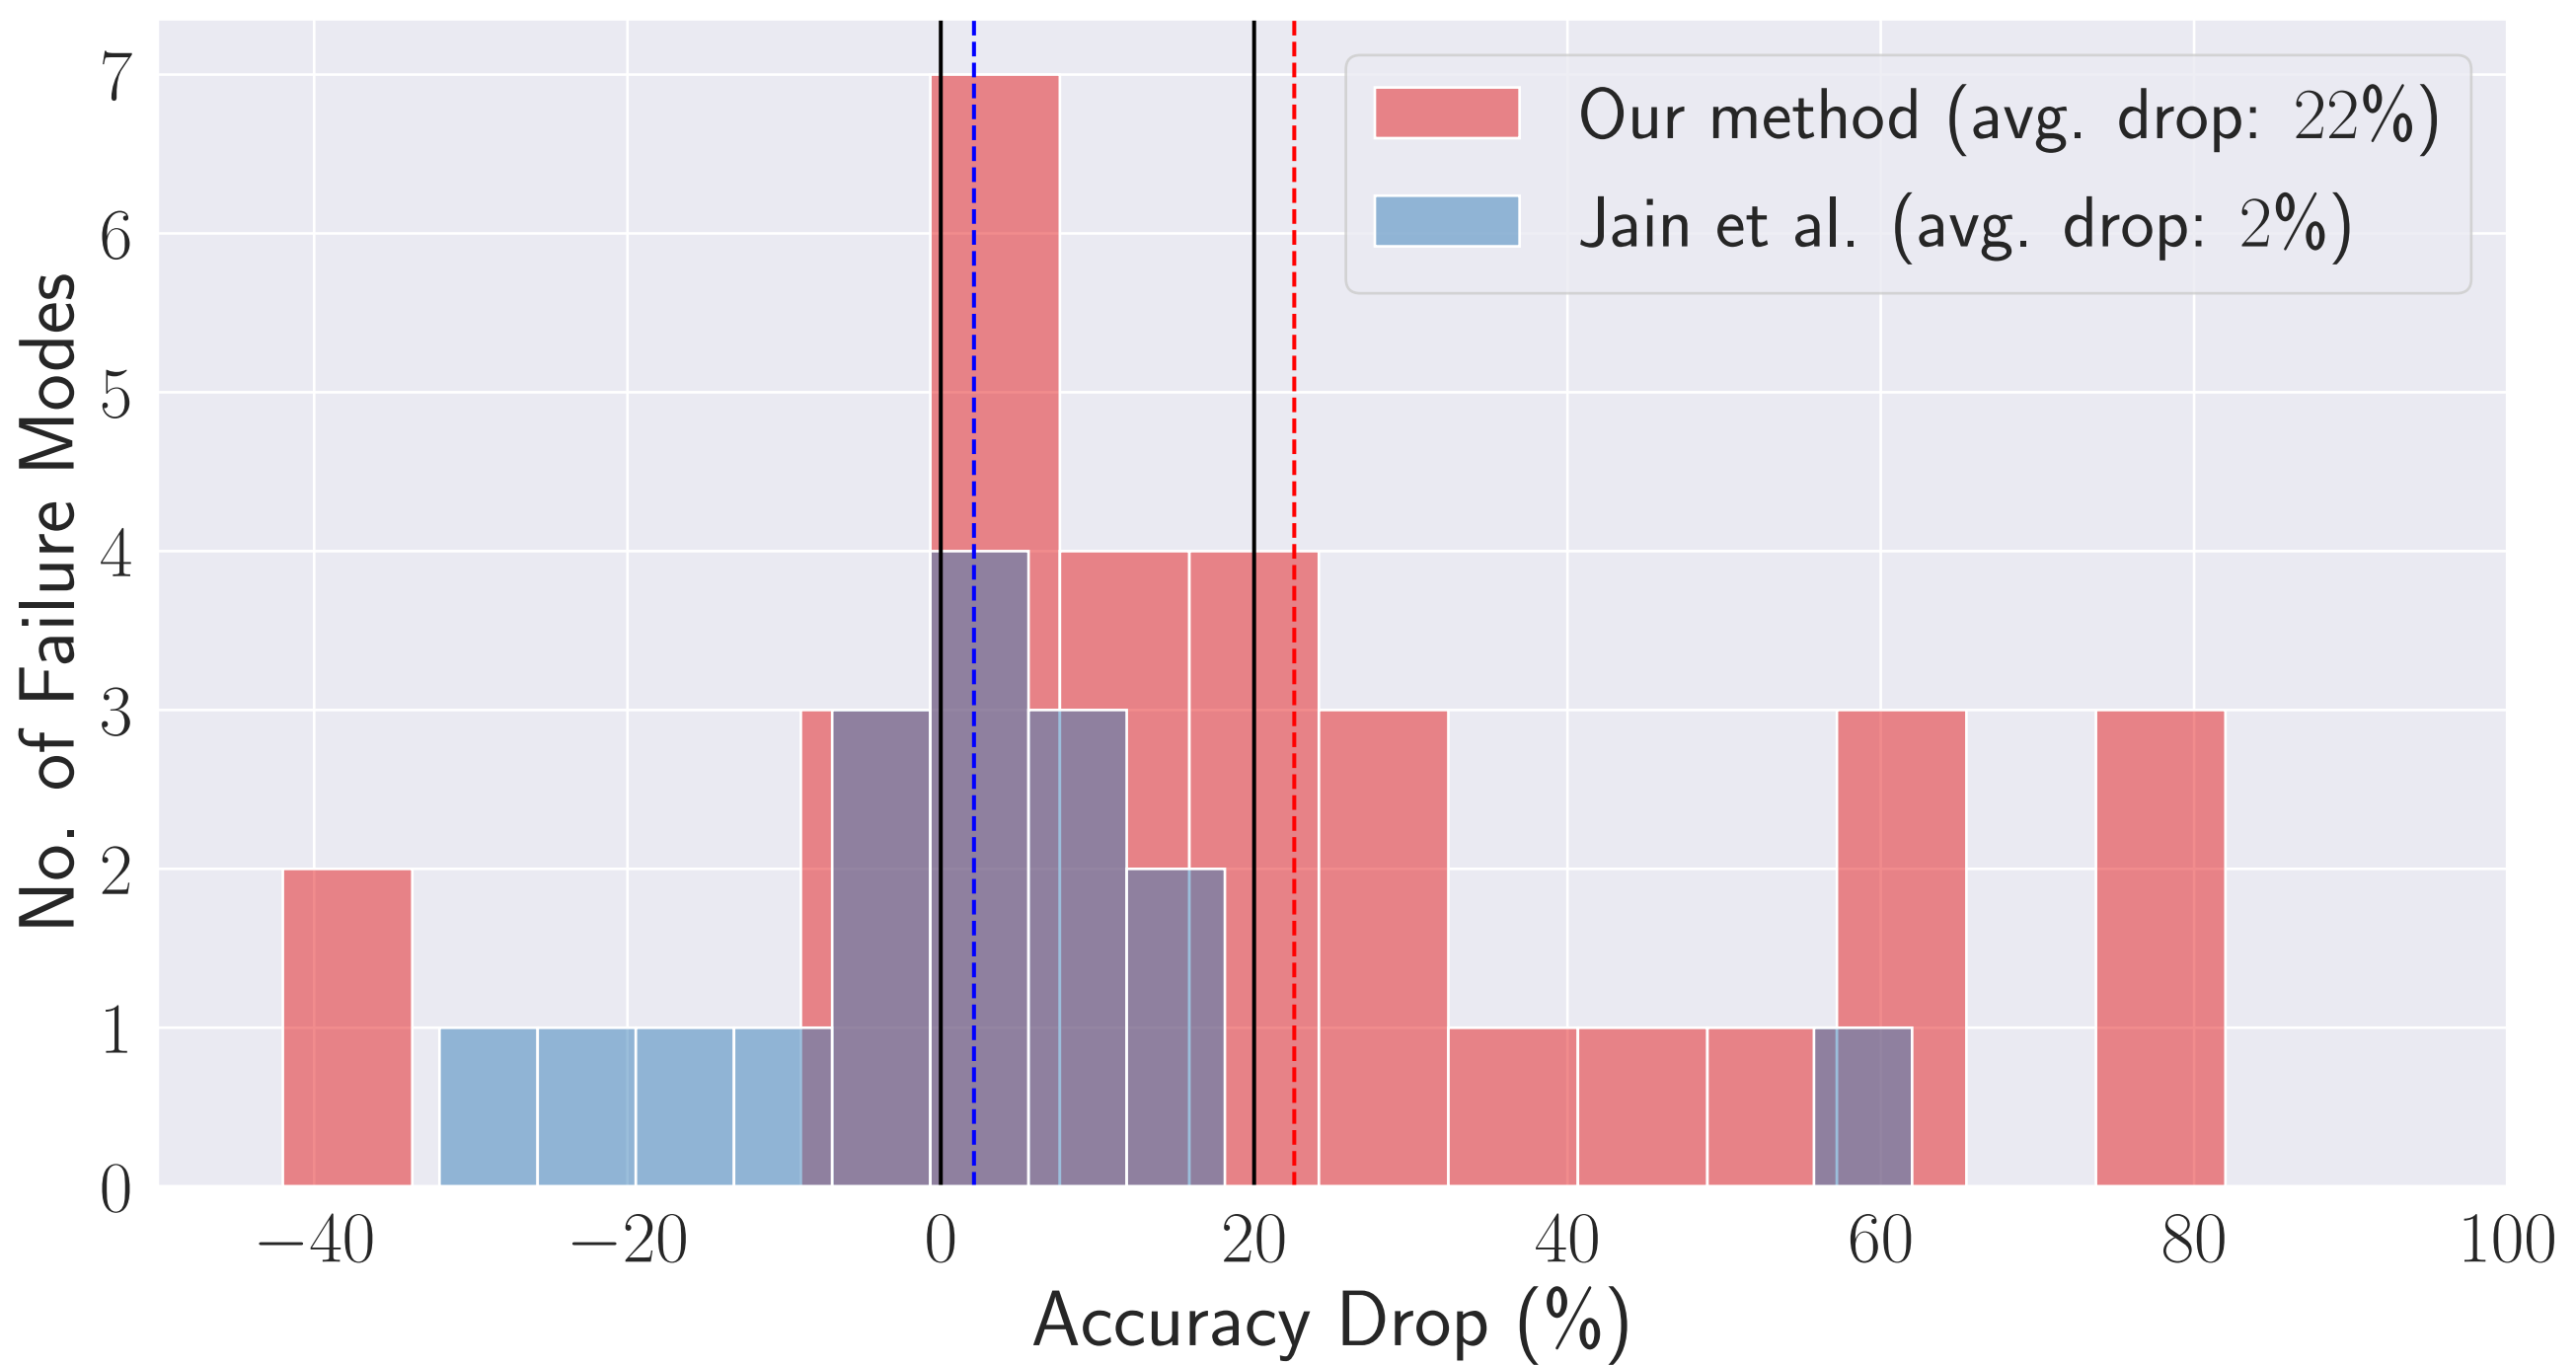

Supplement: supplementary_material [file attachment]

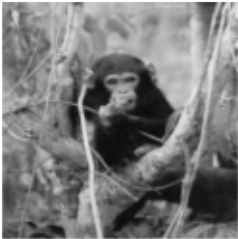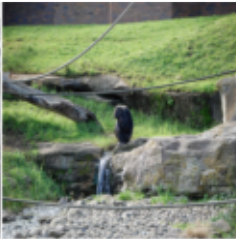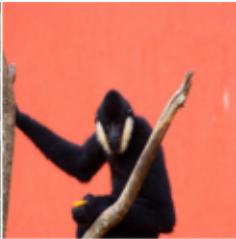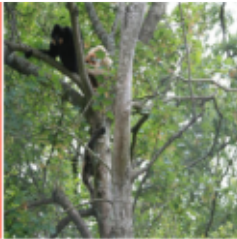

Supplement: supplementary_material [file attachment]

bear (91.69%) → **fence; cage; (69.49%)**

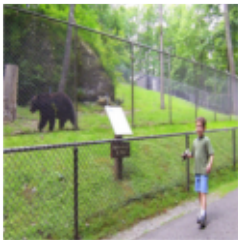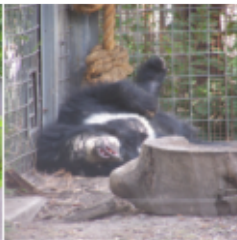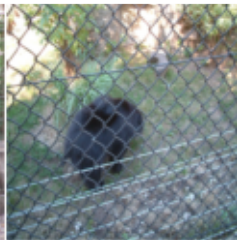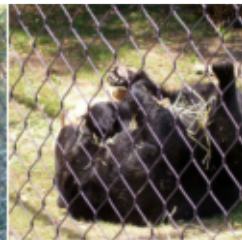

bear (91.69%) → **black; climb; tree branch; (51.85%)**

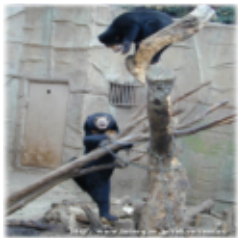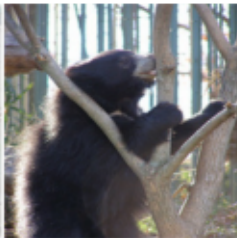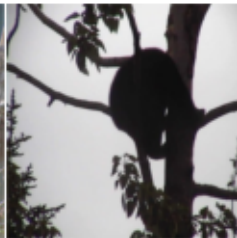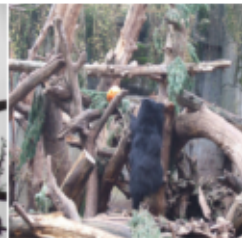

Supplement: supplementary_material [file attachment]

**CelebA** ( $s = 50, a = 30\%$ )

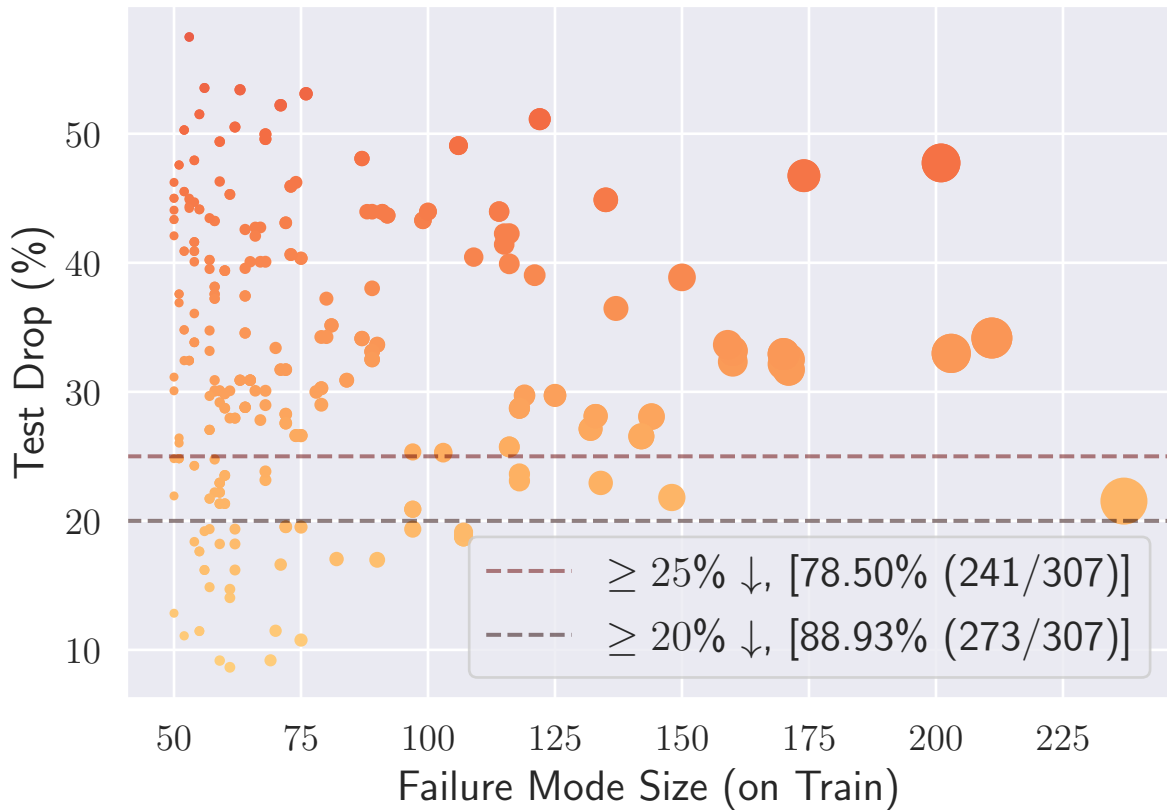

Supplement: supplementary_material [file attachment]

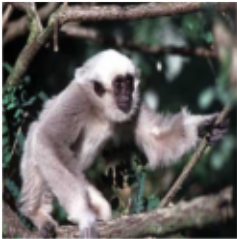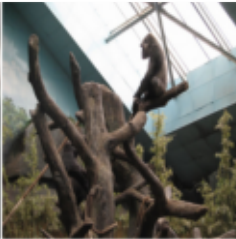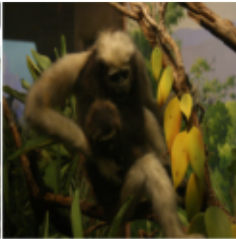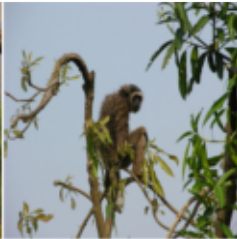

Supplement: supplementary_material [file attachment]

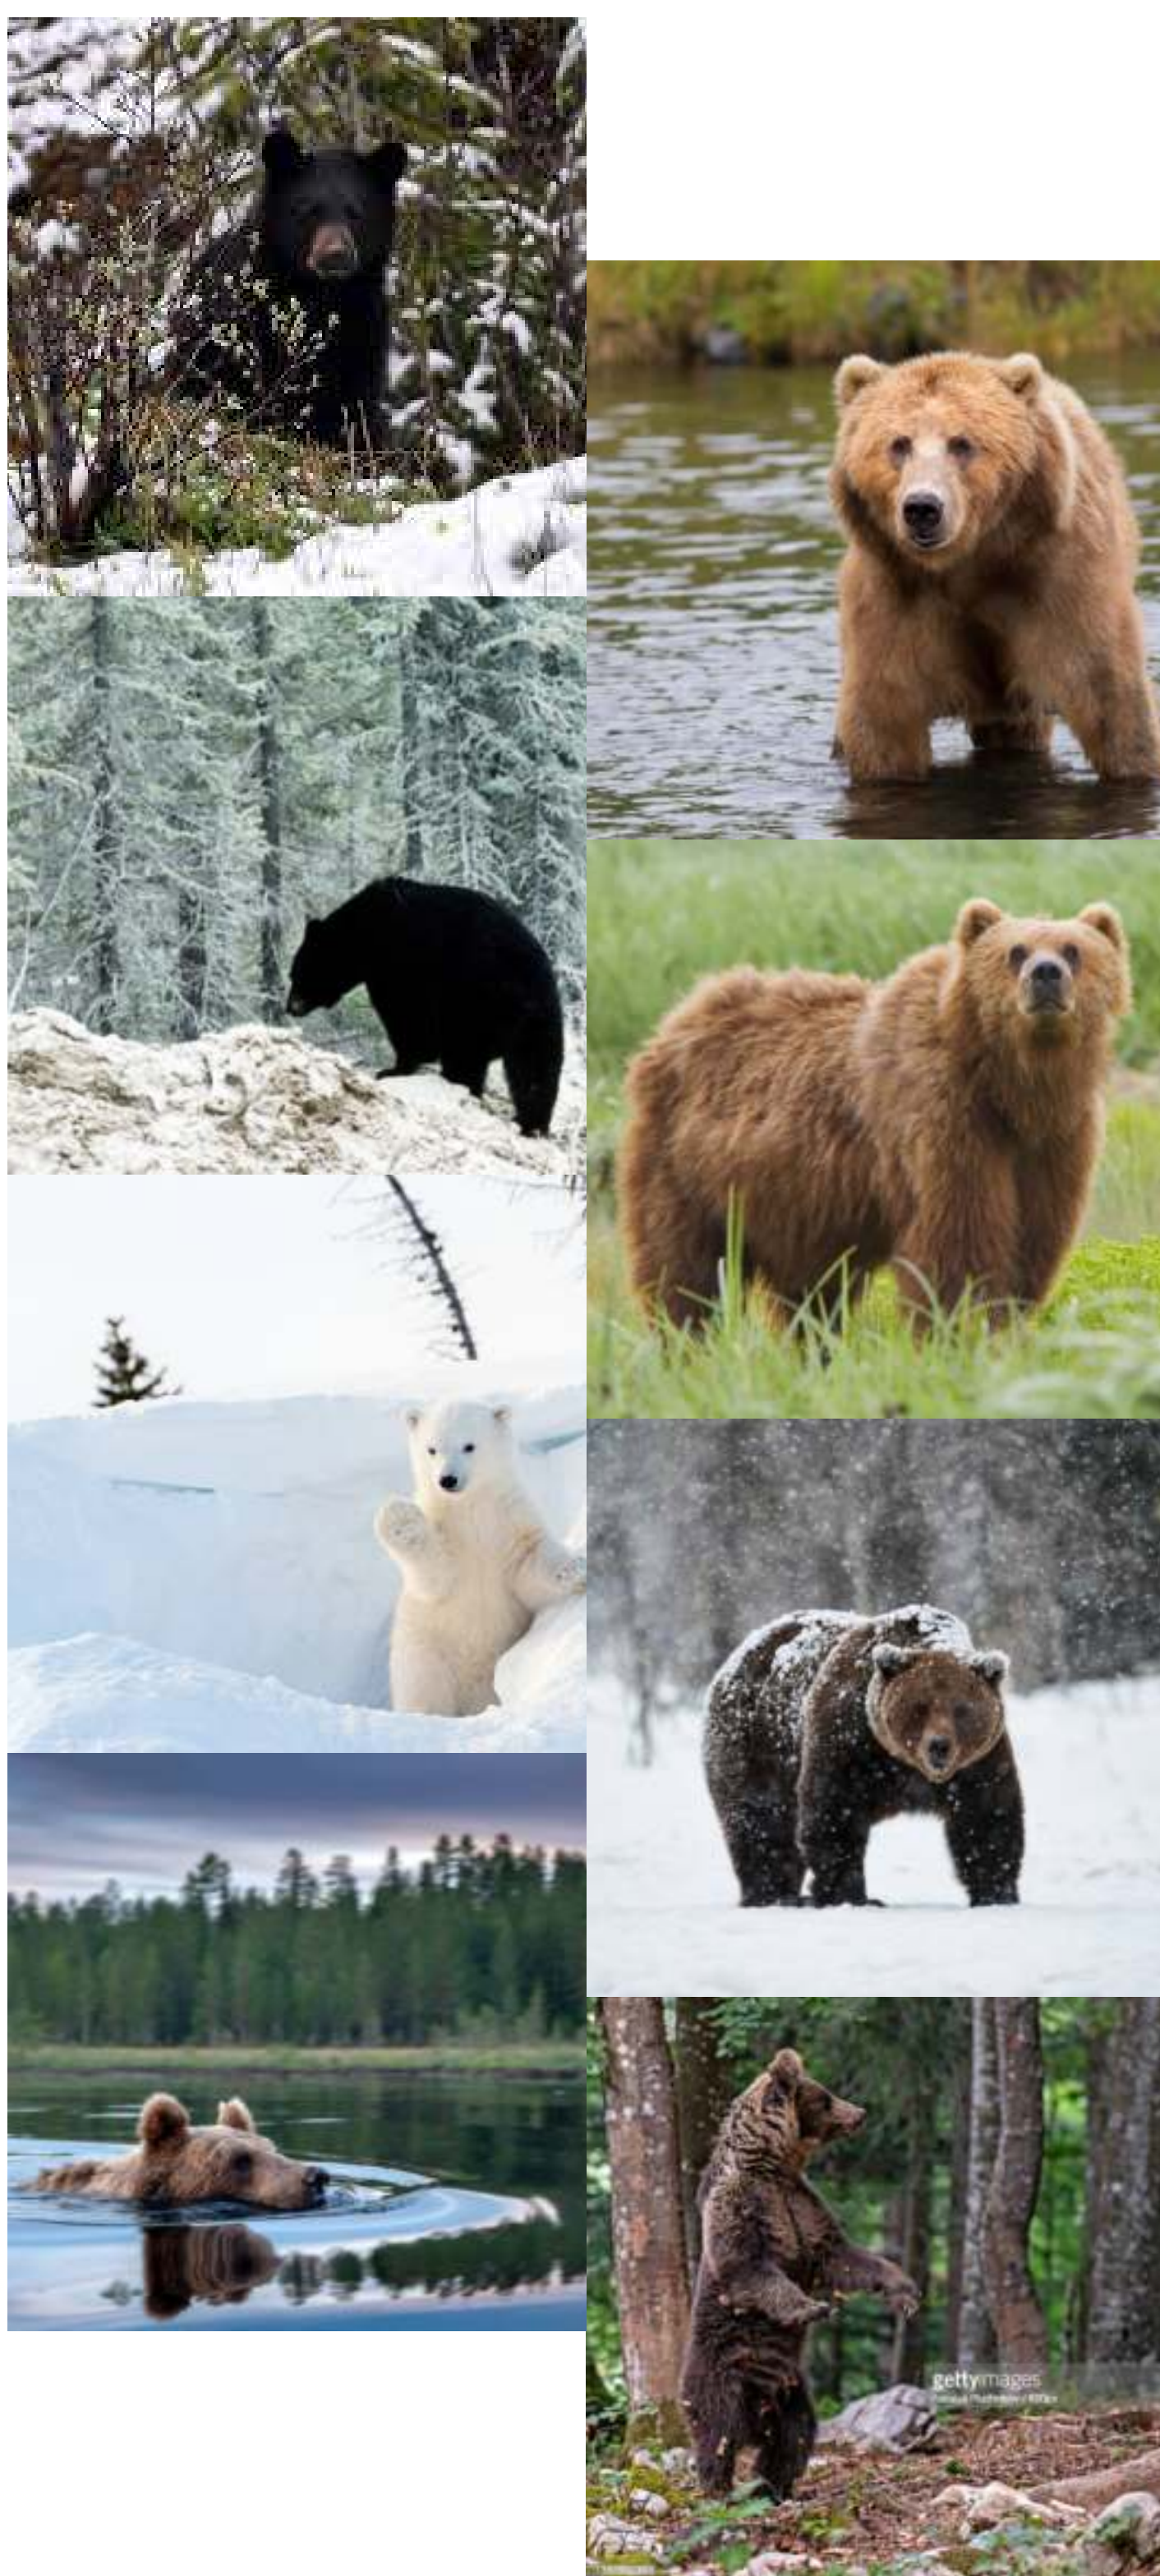

Model Accuracy: 90%

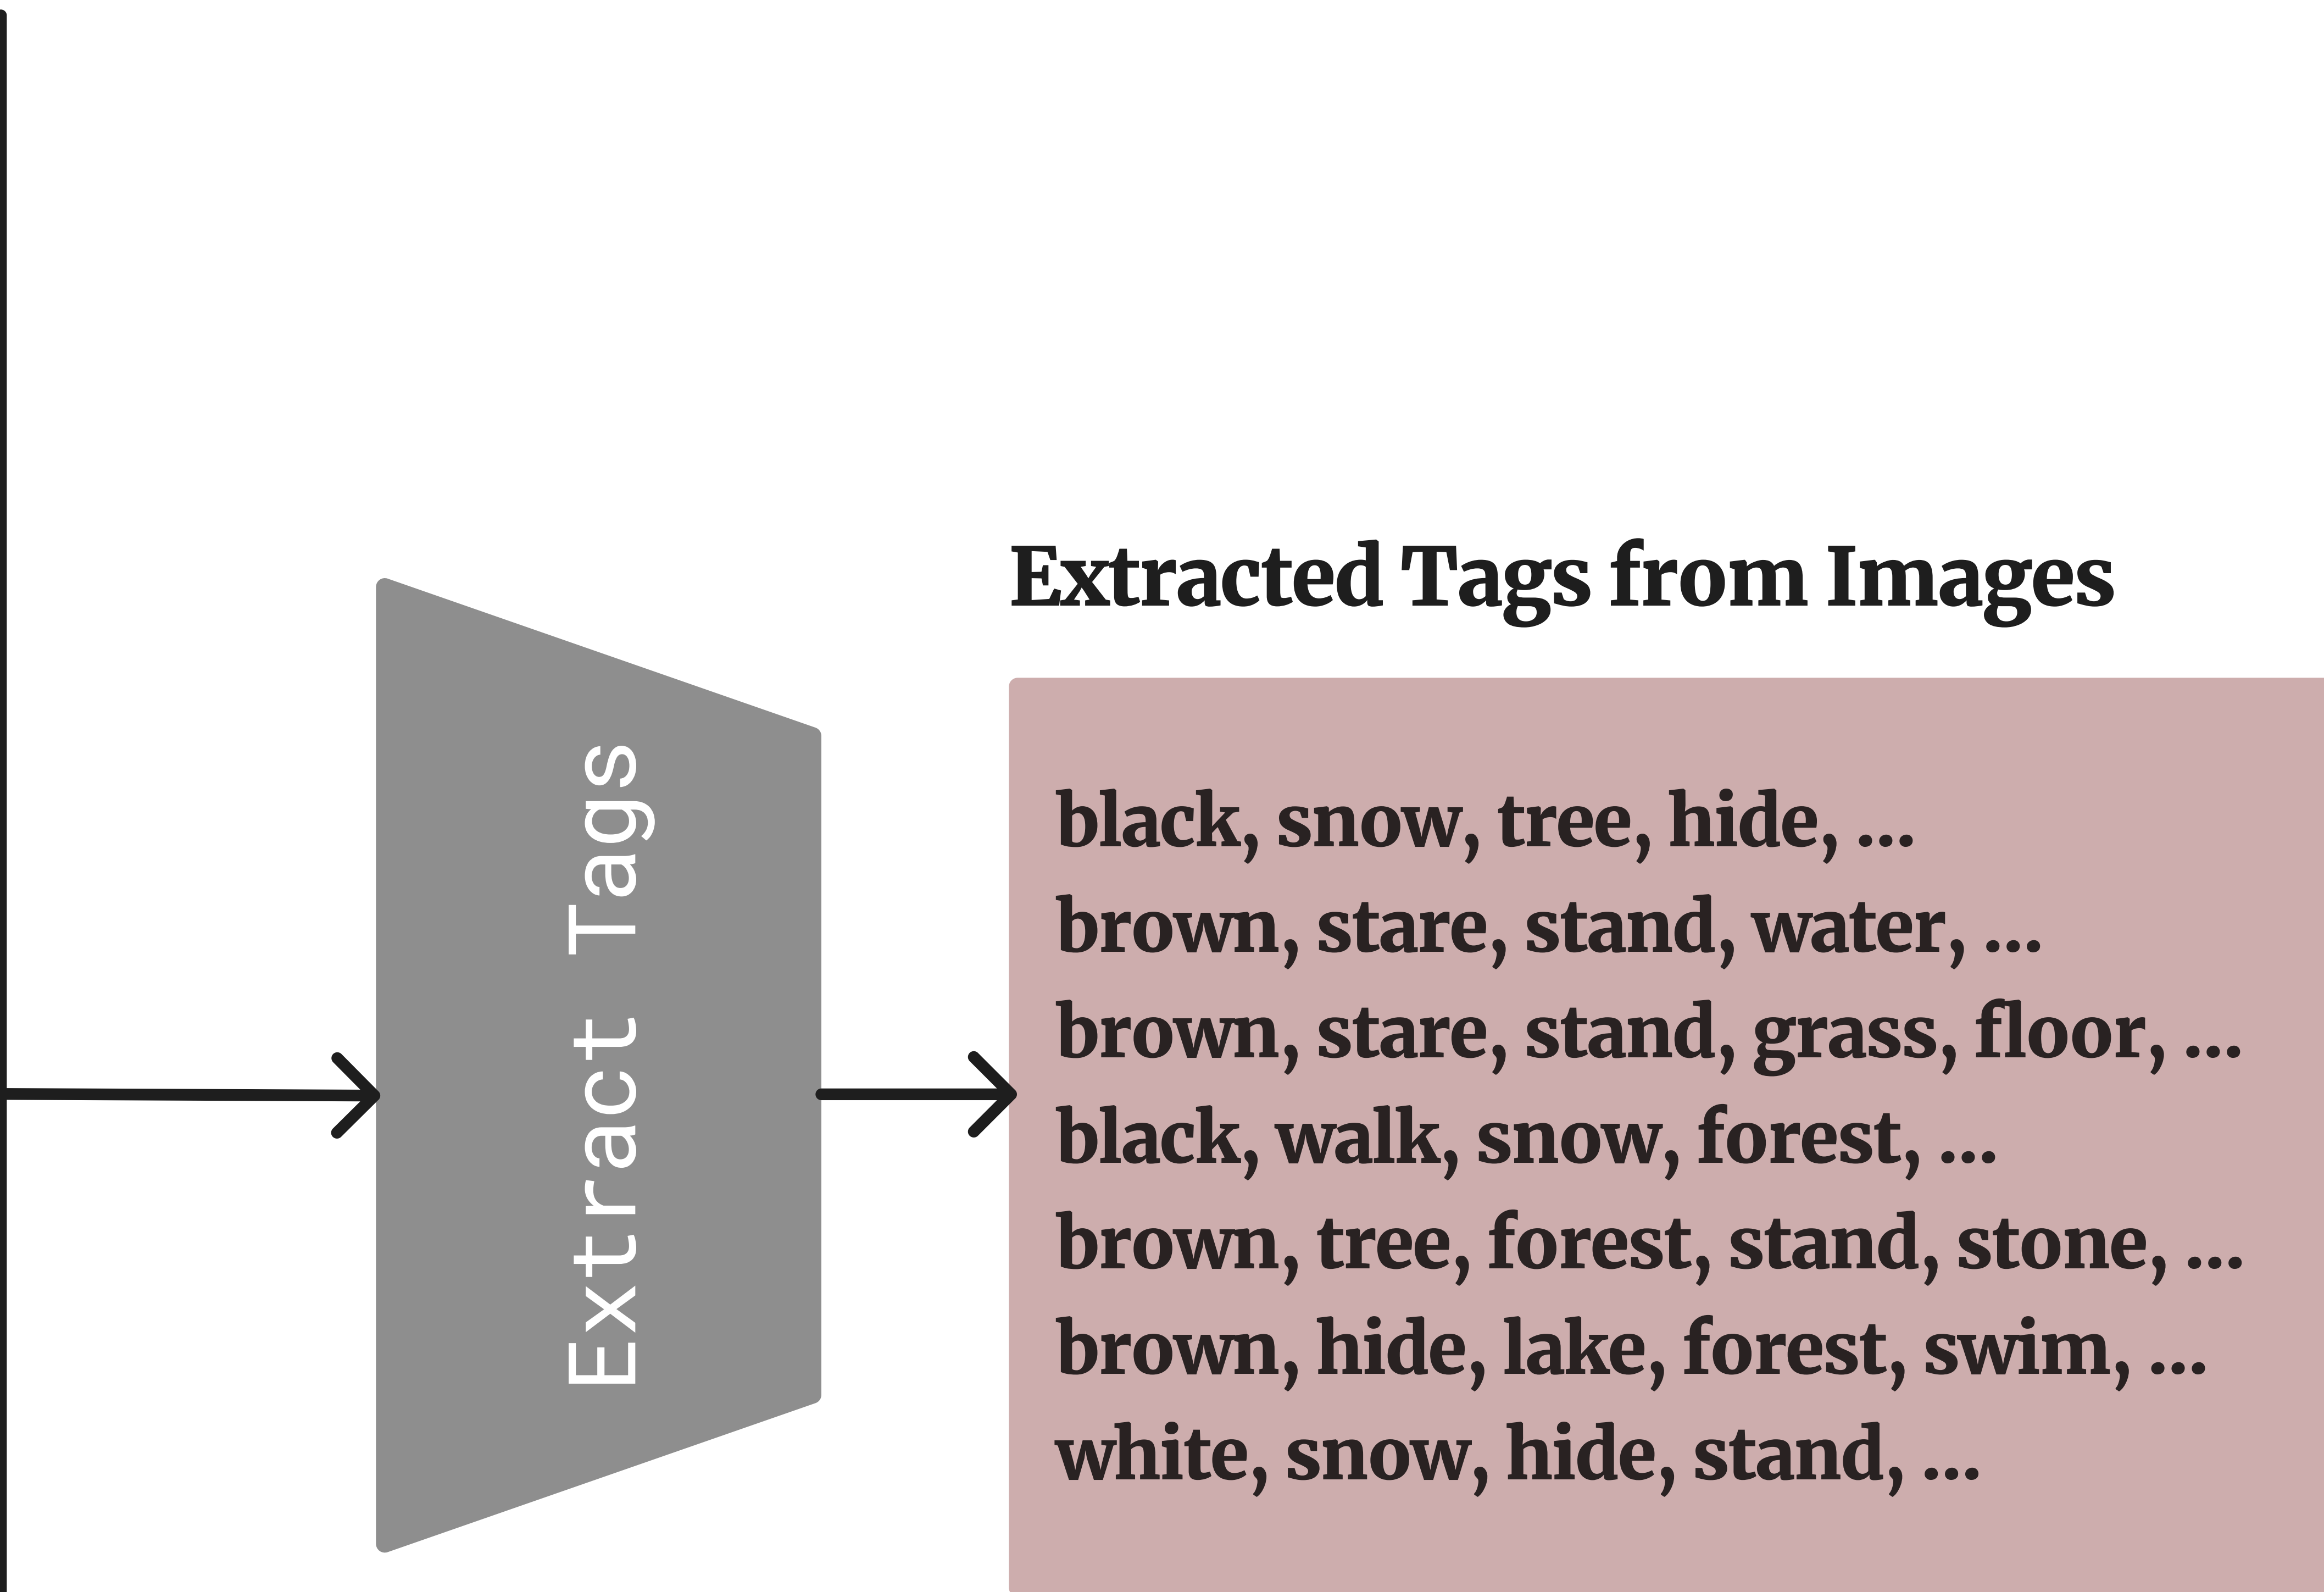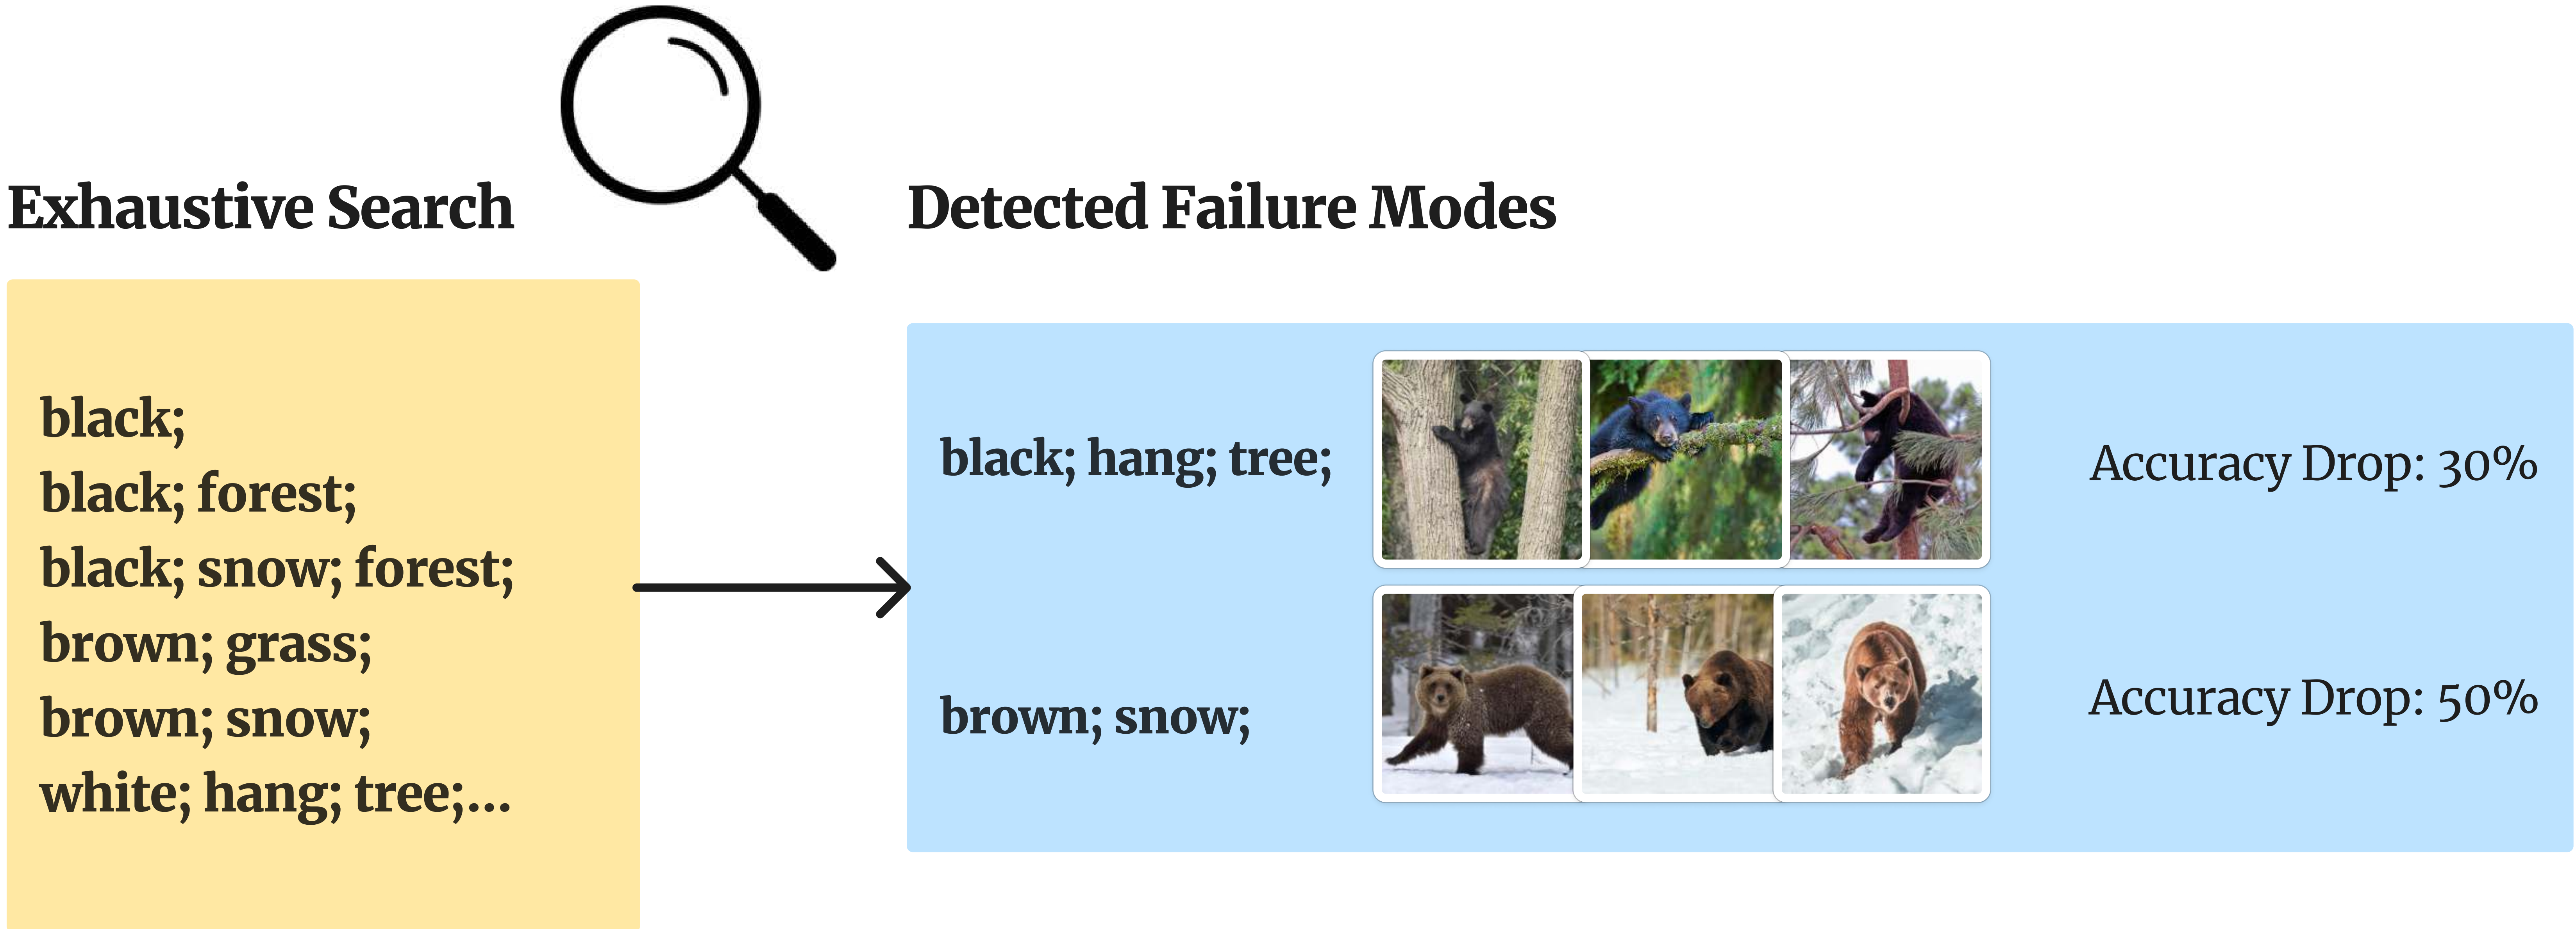

Supplement: supplementary_material [file attachment]

Similarity Score Distribution → AUROC: 0.60

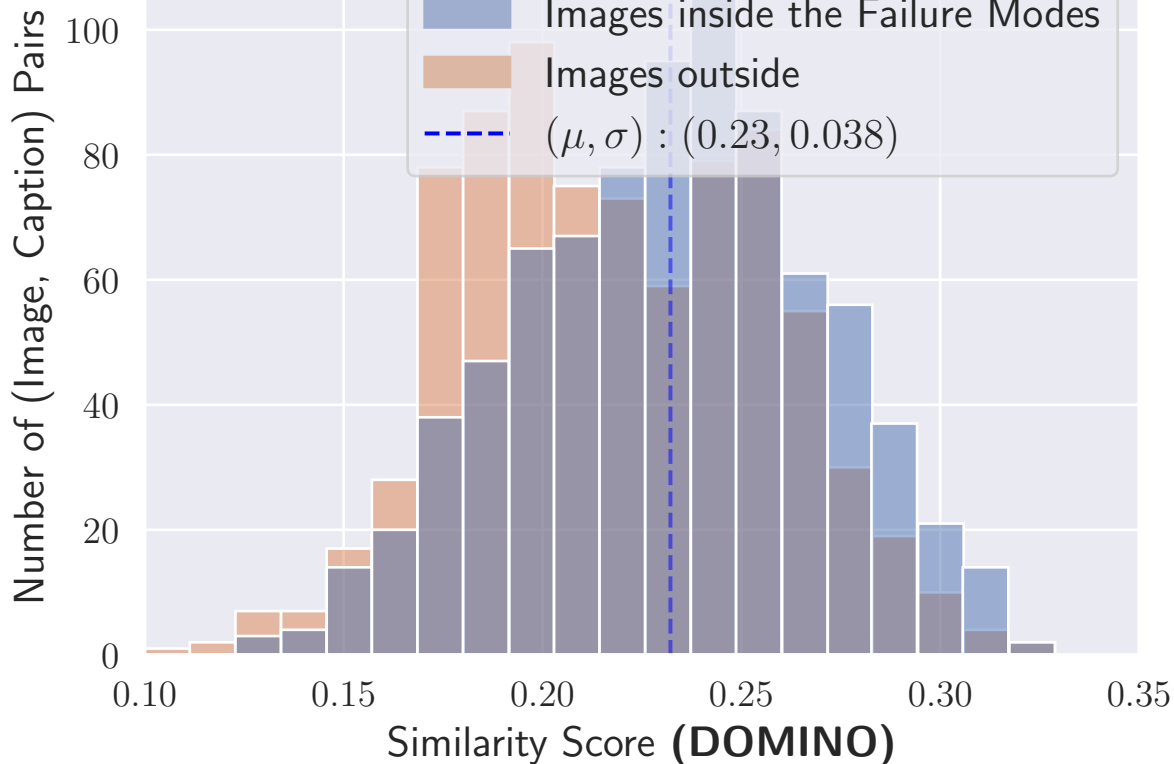

Supplement: supplementary_material [file attachment]

# Living17 ( $s = 25, a = 25\%$ )

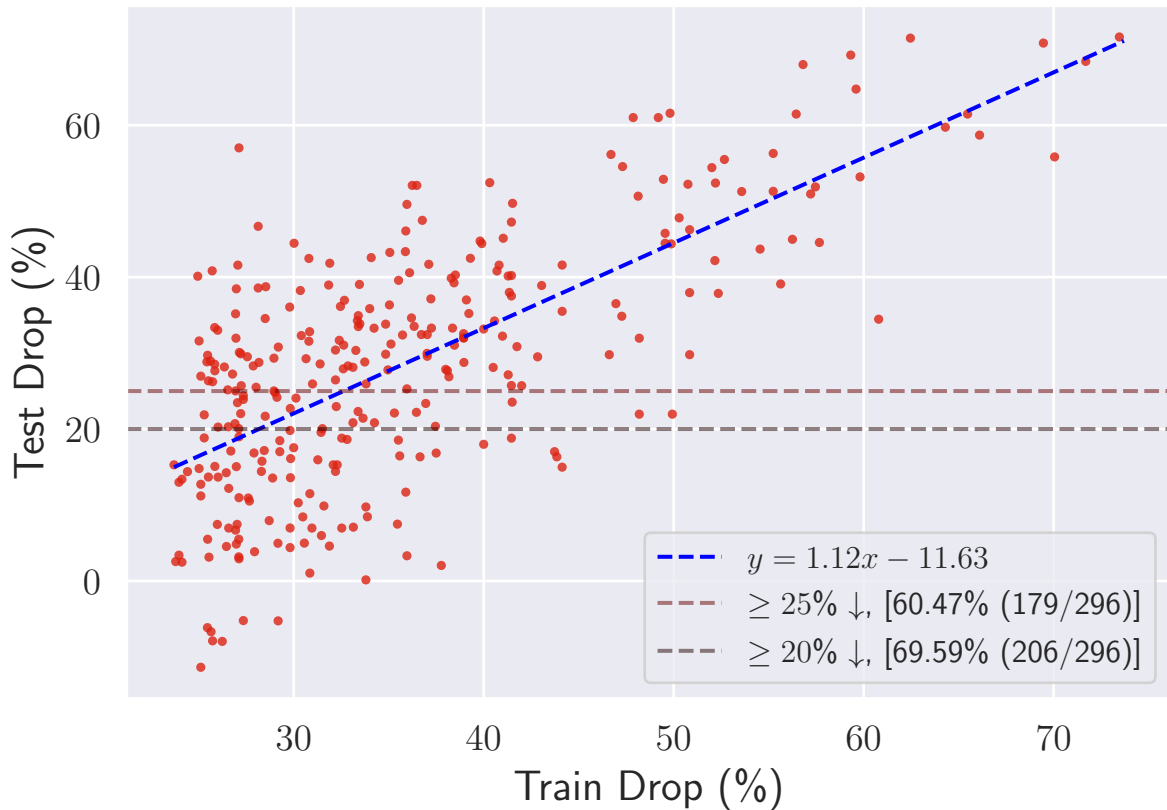

Supplement: supplementary_material [file attachment]

## Waterbirds ( $s = 35, a = 25\%$ )

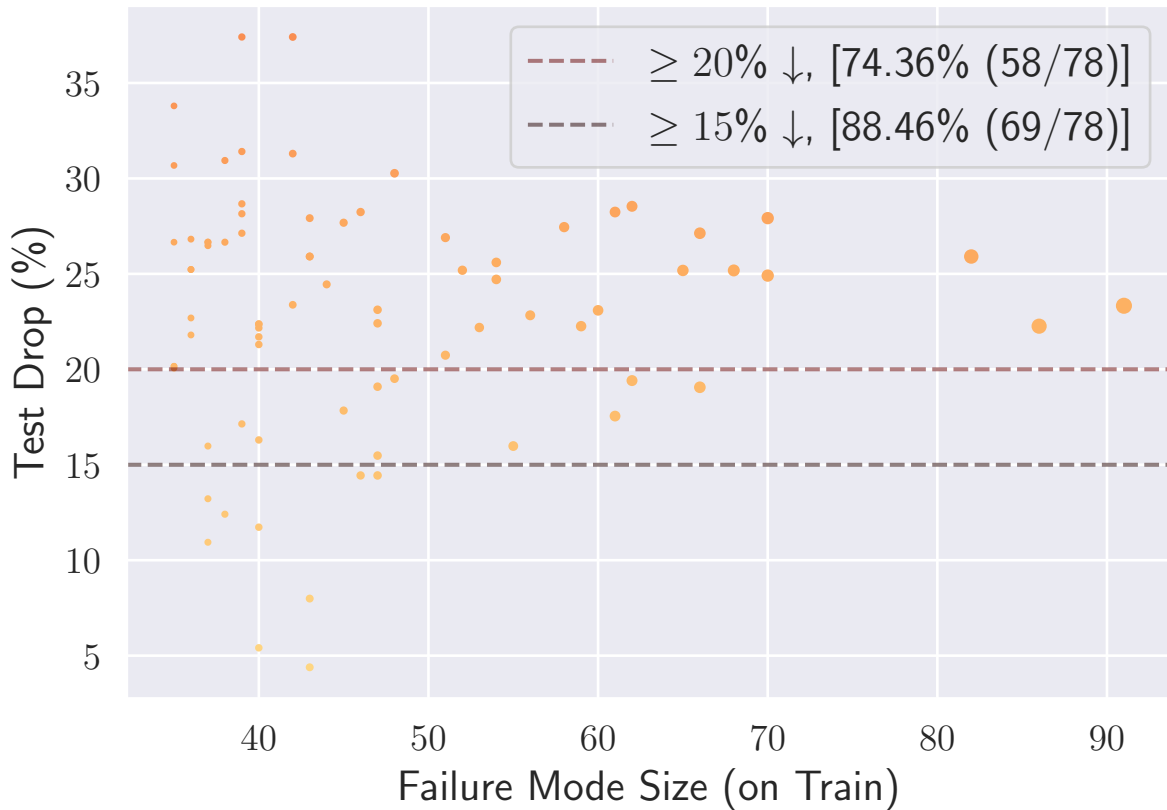

Supplement: supplementary_material [file attachment]

# Entity13 ( $s = 100, a = 30\%$ )

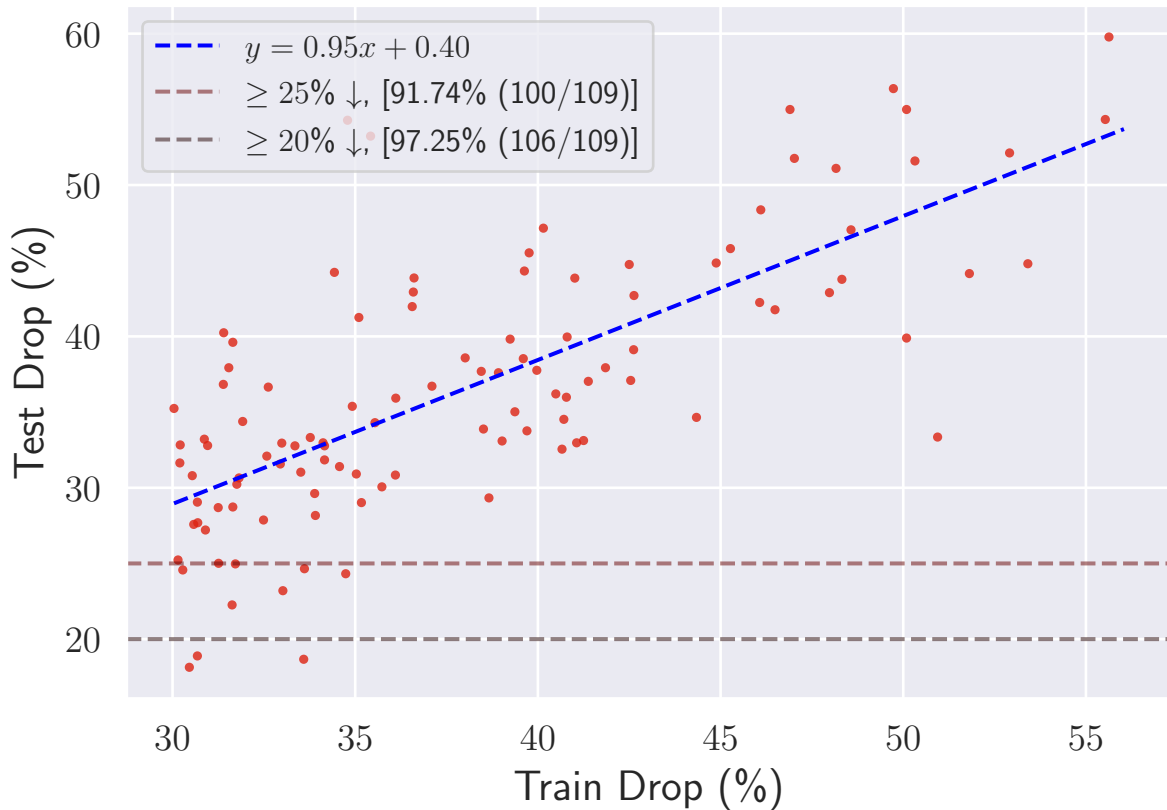

Supplement: supplementary_material [file attachment]

## Entity13 (DOMINO)

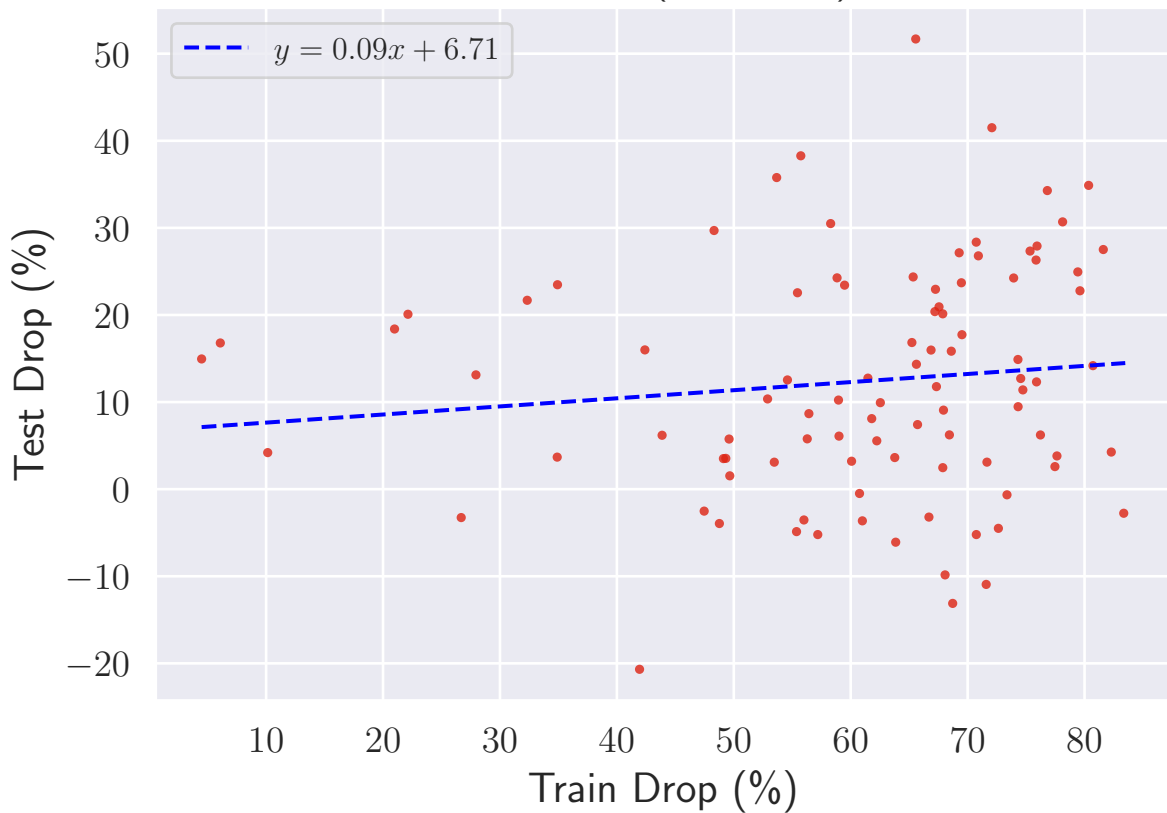

Supplement: supplementary_material [file attachment]

# Similarity Score Distribution → AUROC: 0.78

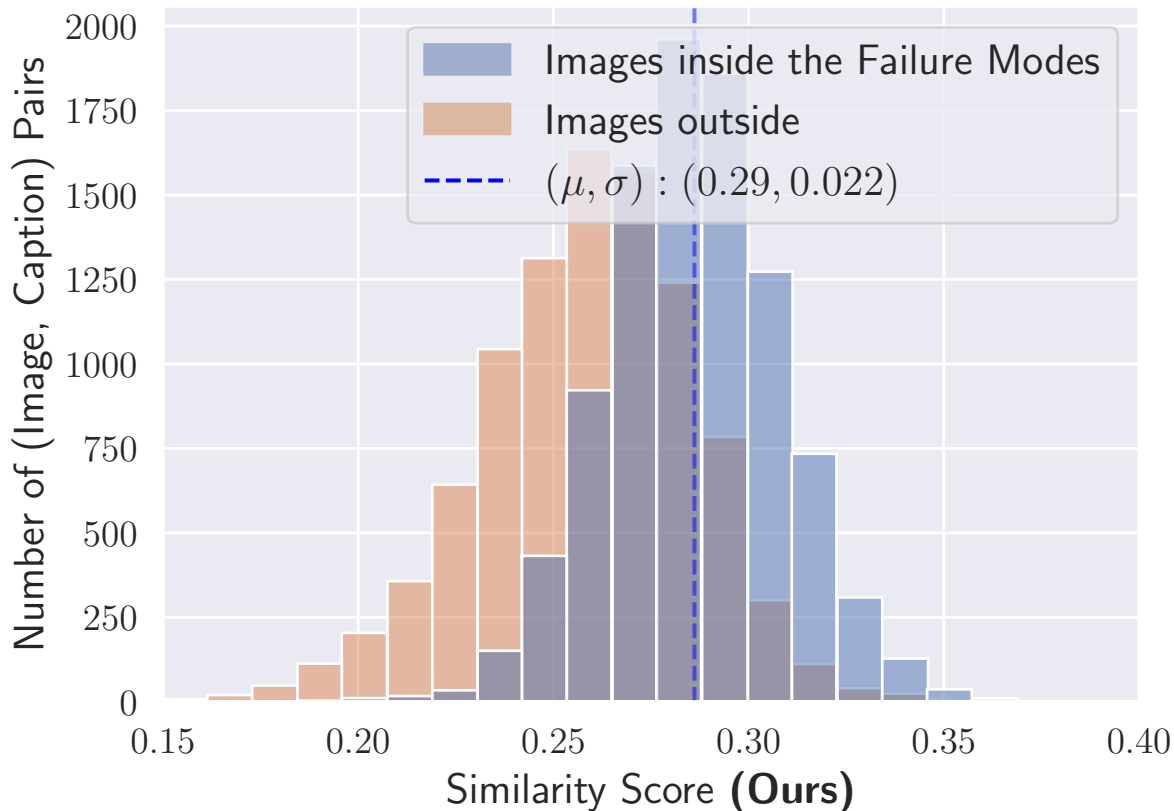

Supplement: supplementary_material [file attachment]

## Waterbirds ( $s = 25, a = 25\%$ )

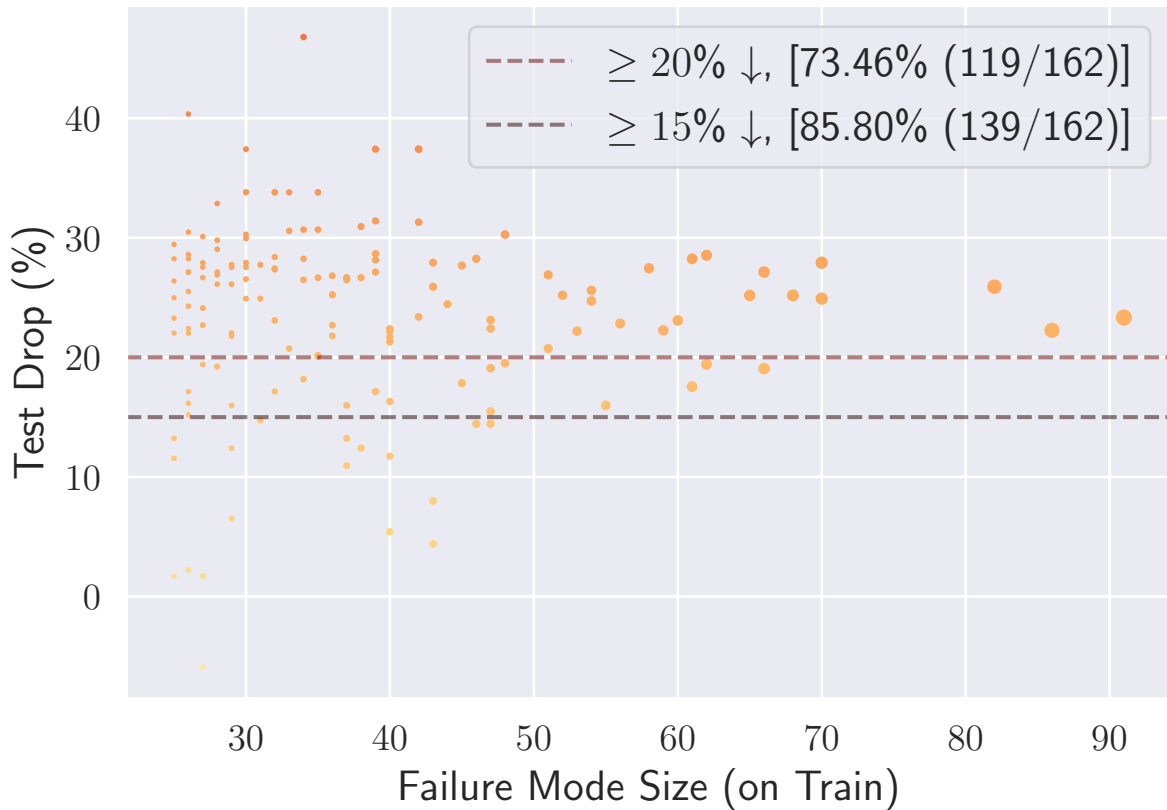

Supplement: supplementary_material [file attachment]

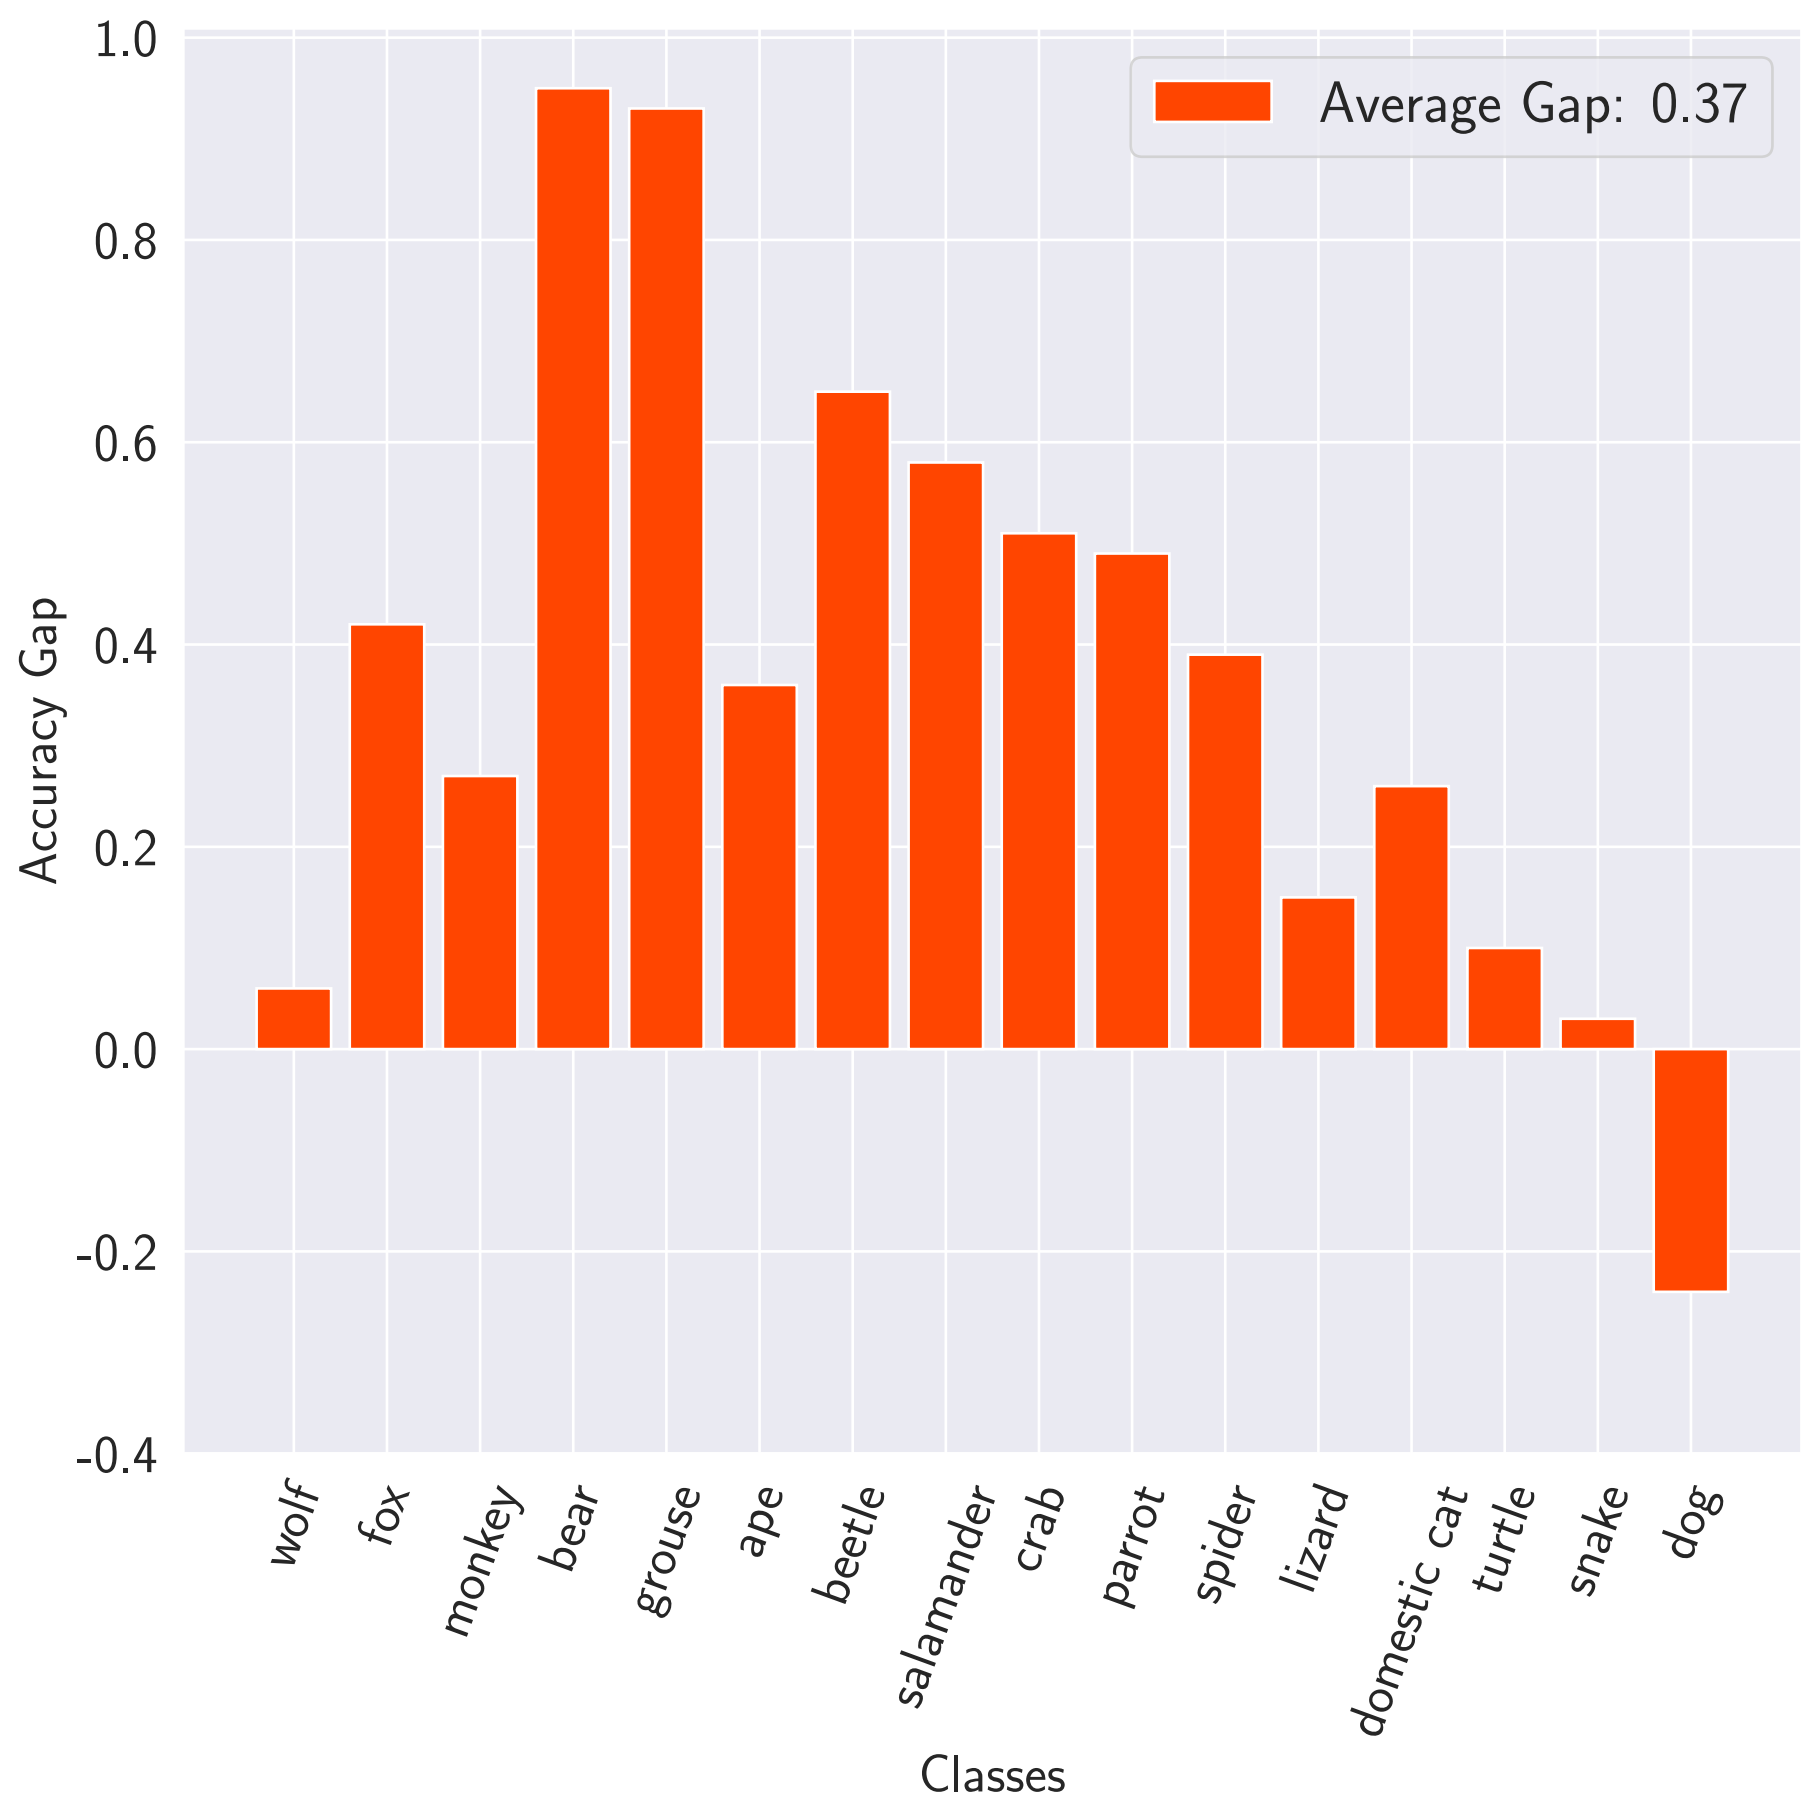

Supplement: supplementary_material [file attachment]

Similarity Score Distribution → AUROC: 0.69

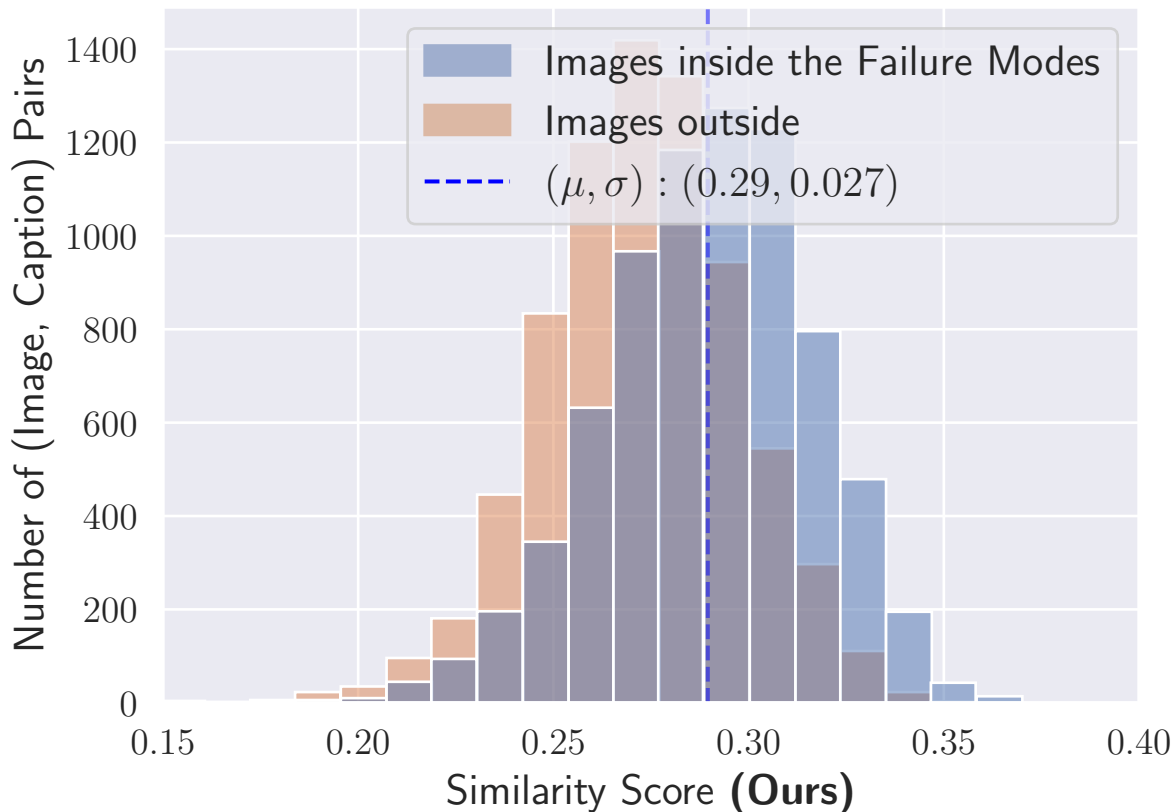

Supplement: supplementary_material [file attachment]

Similarity Score Distribution → AUROC: 0.71

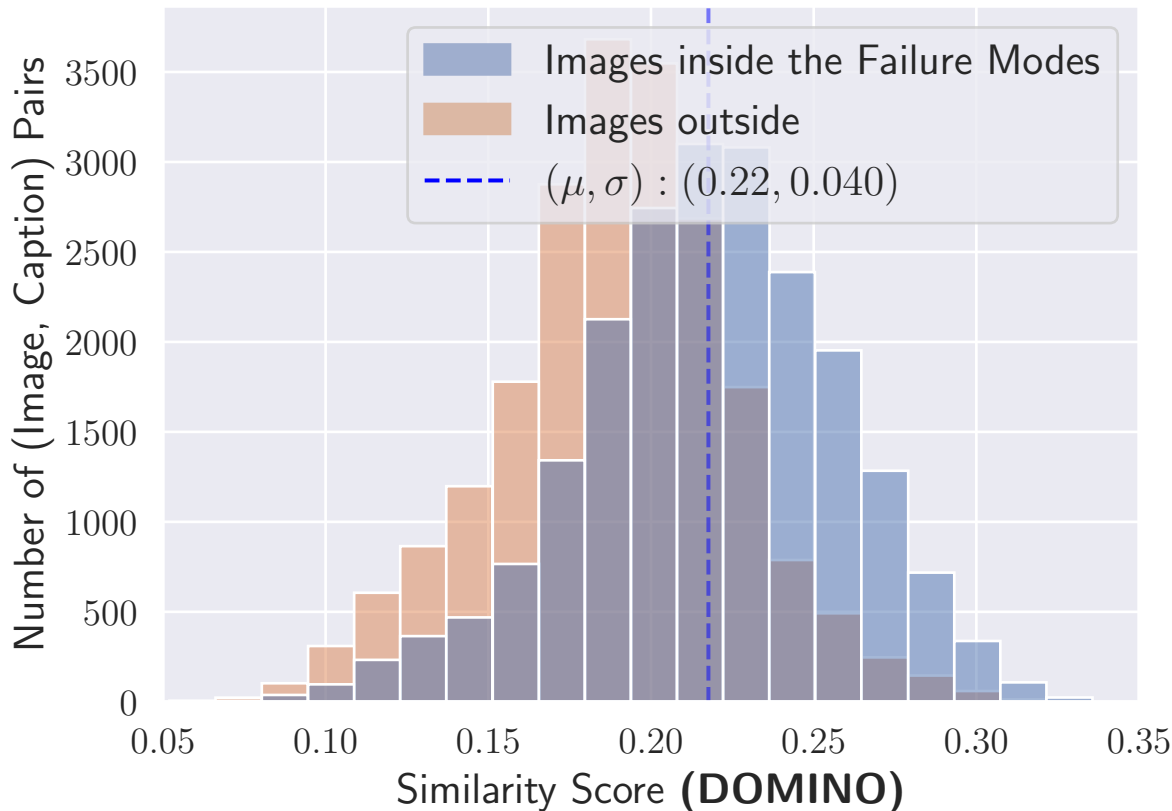

Supplement: supplementary_material [file attachment]

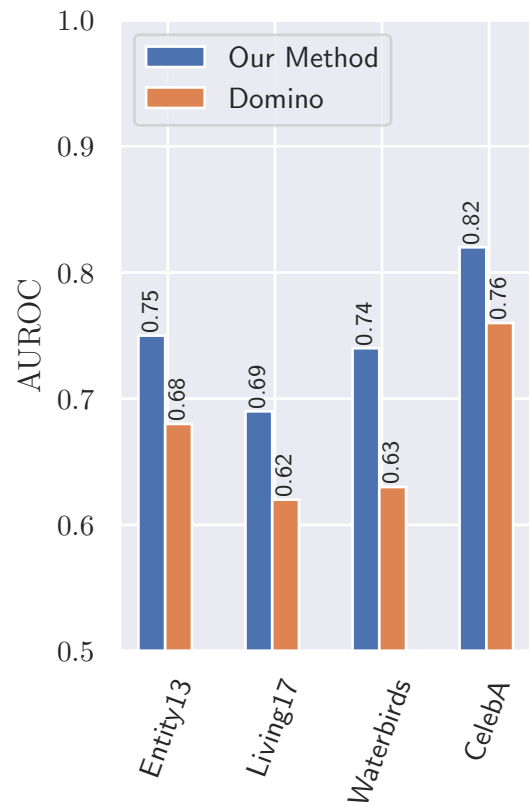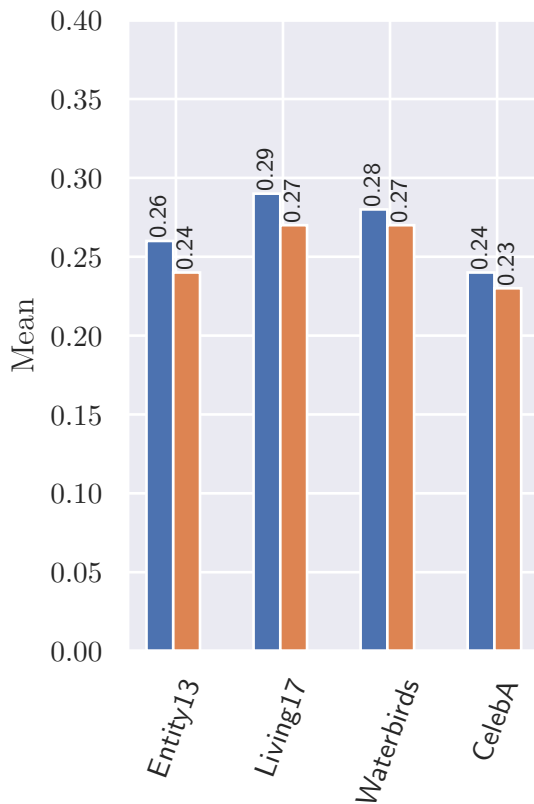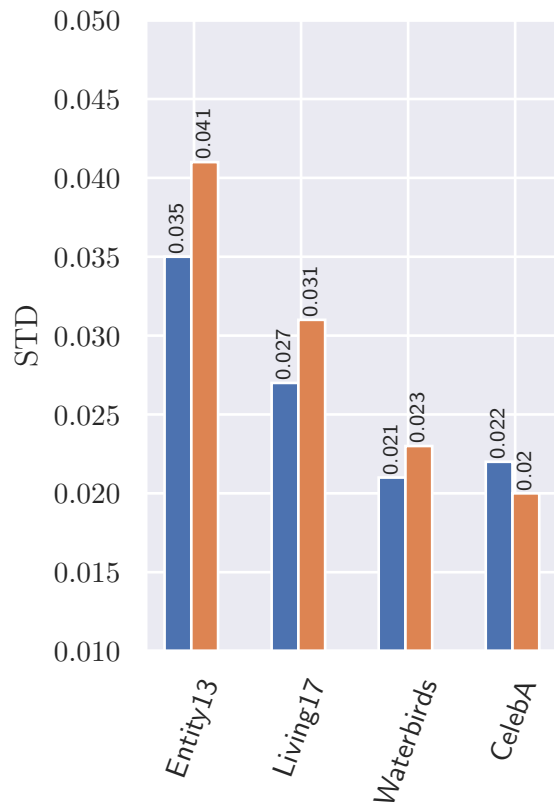

Supplement: supplementary_material [file attachment]

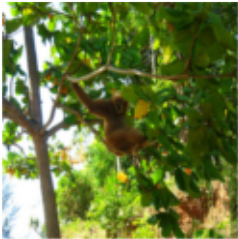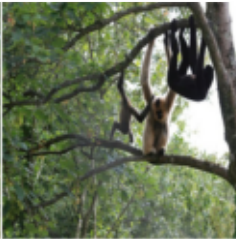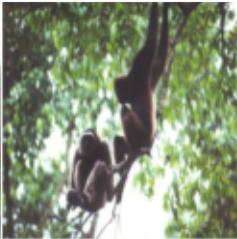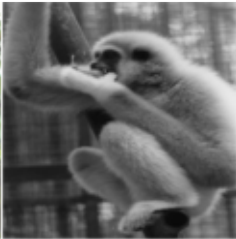

Supplement: supplementary_material [file attachment]

smooth newt (73.85%) → **forest floor;** (57.41%)

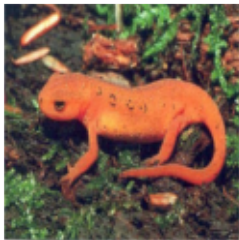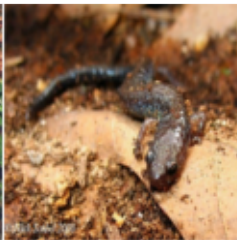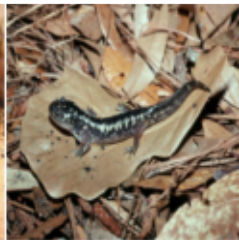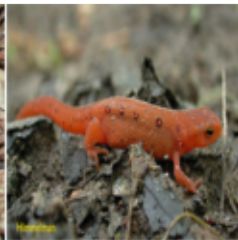

smooth newt (73.85%) → **stone; black;** (47.83%)

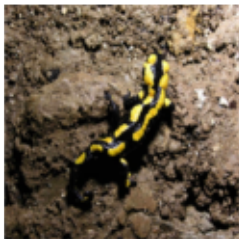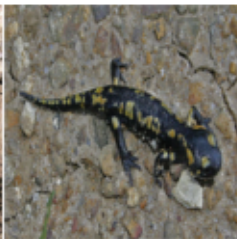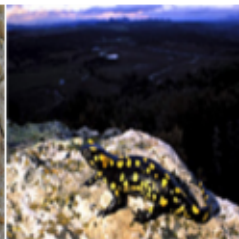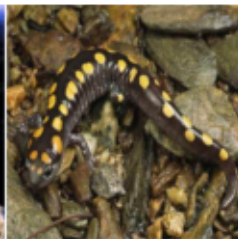

Supplement: supplementary_material [file attachment]

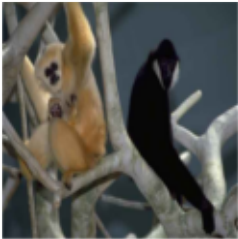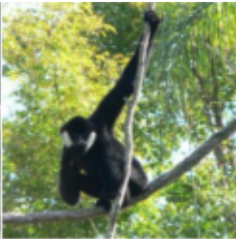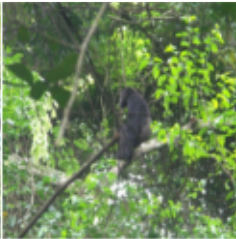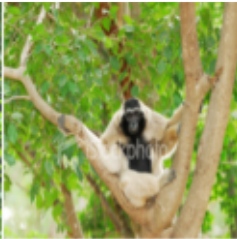

Supplement: supplementary_material [file attachment]

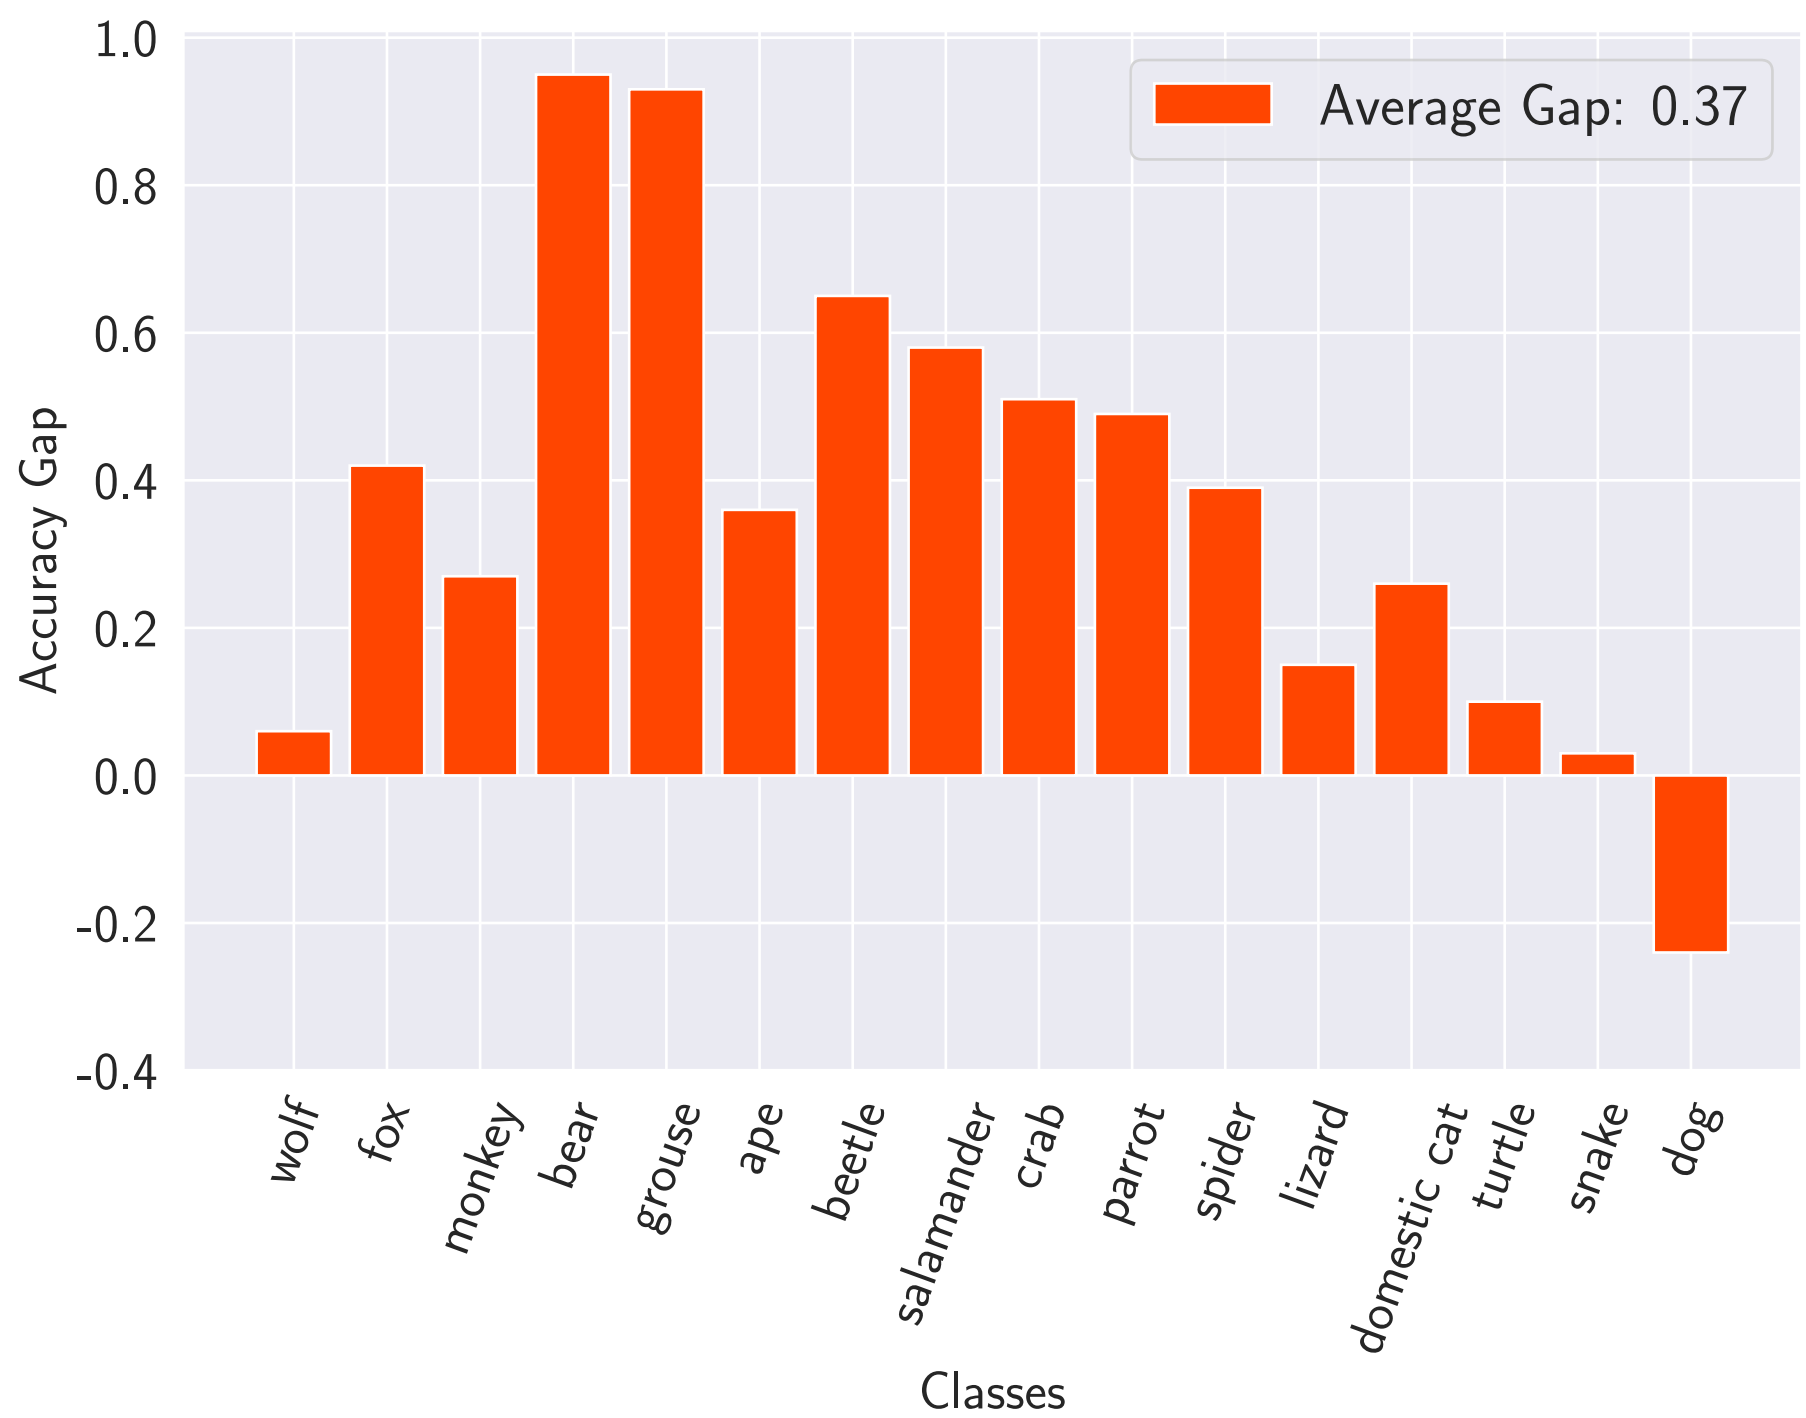

Supplement: supplementary_material [file attachment]

# Living17 ( $s = 25, a = 25\%$ )

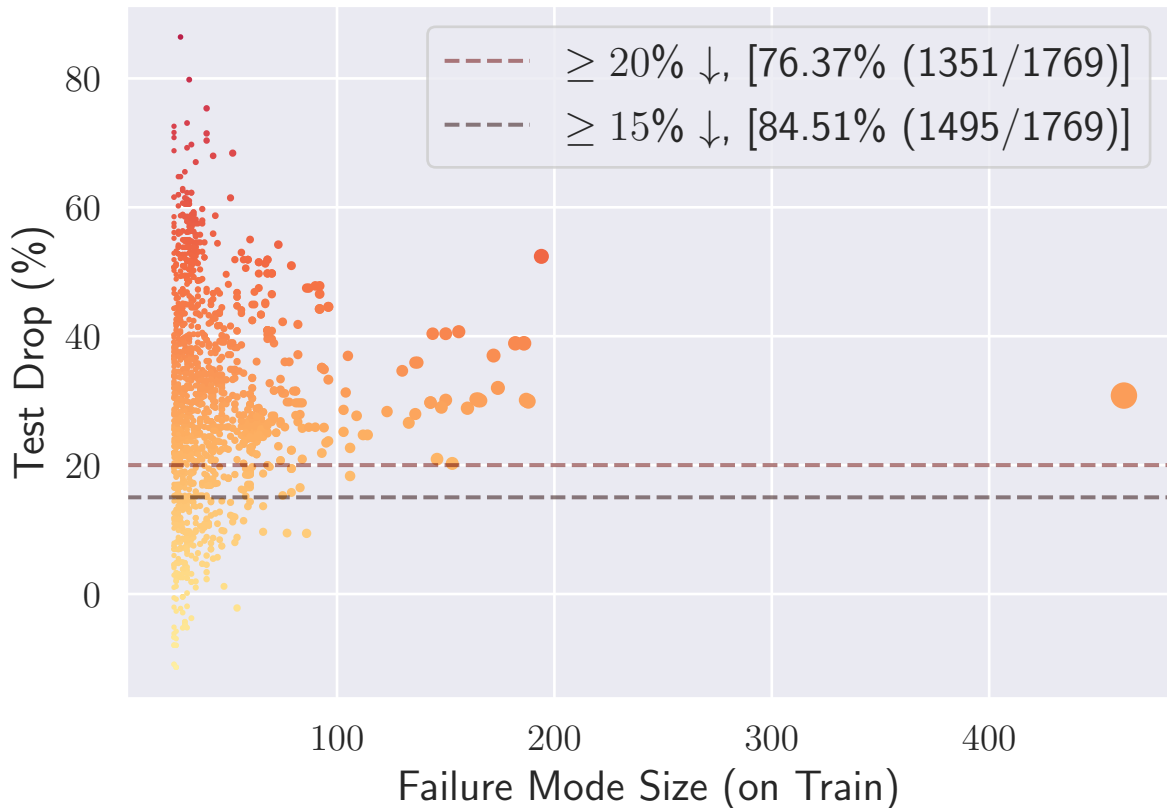

Supplement: supplementary_material [file attachment]

## Waterbirds (DOMINO)

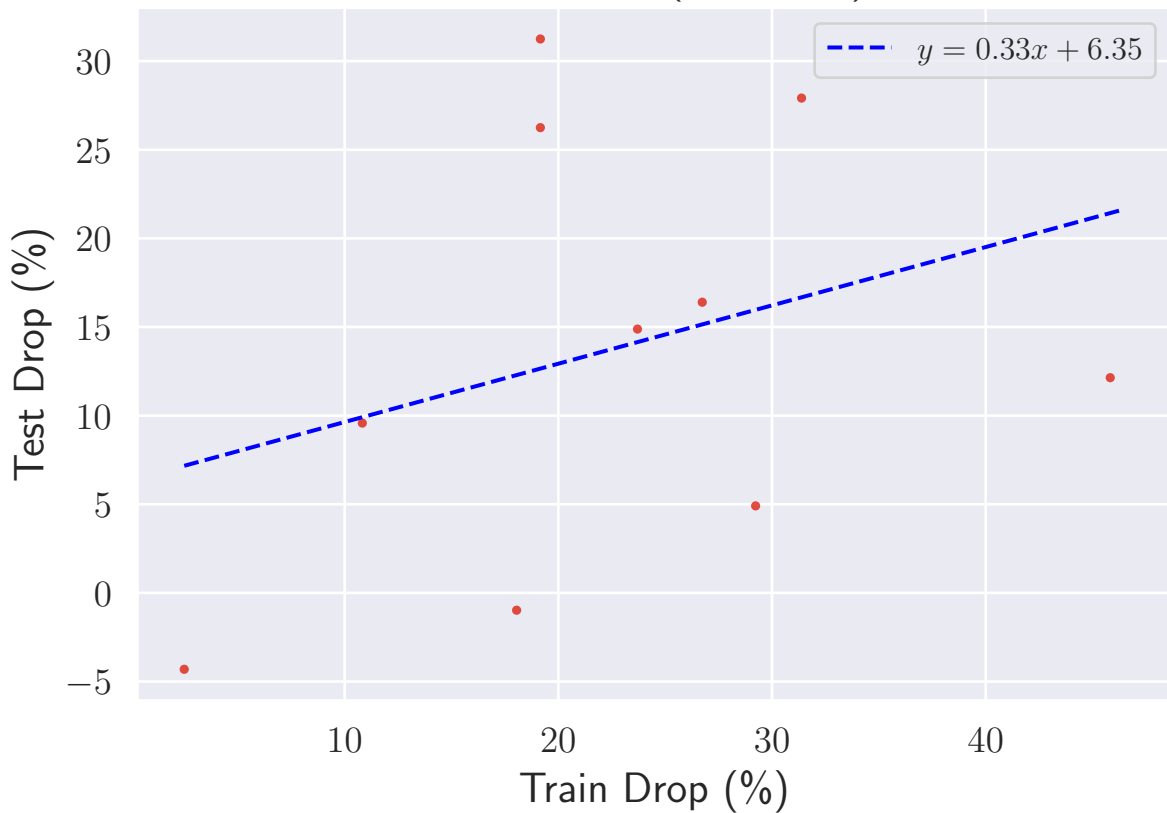

Supplement: supplementary_material [file attachment]

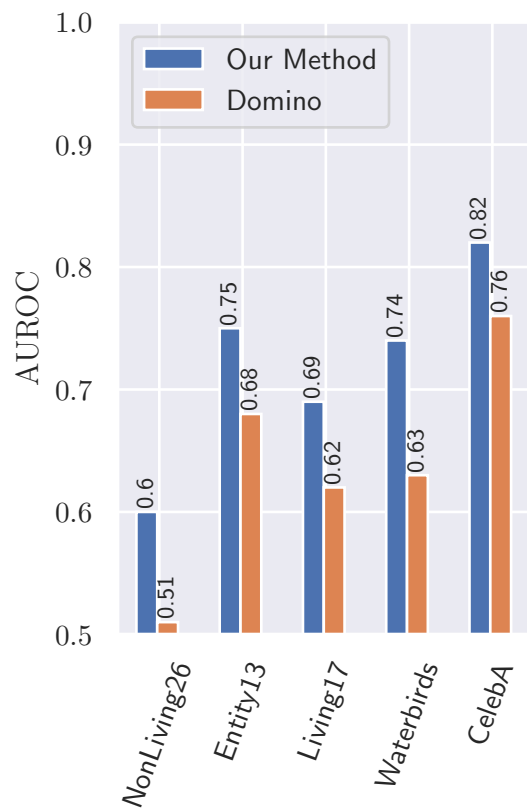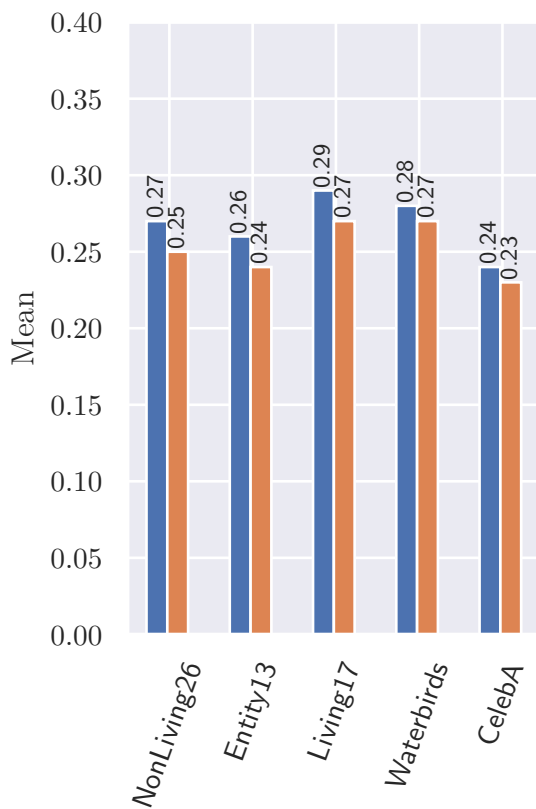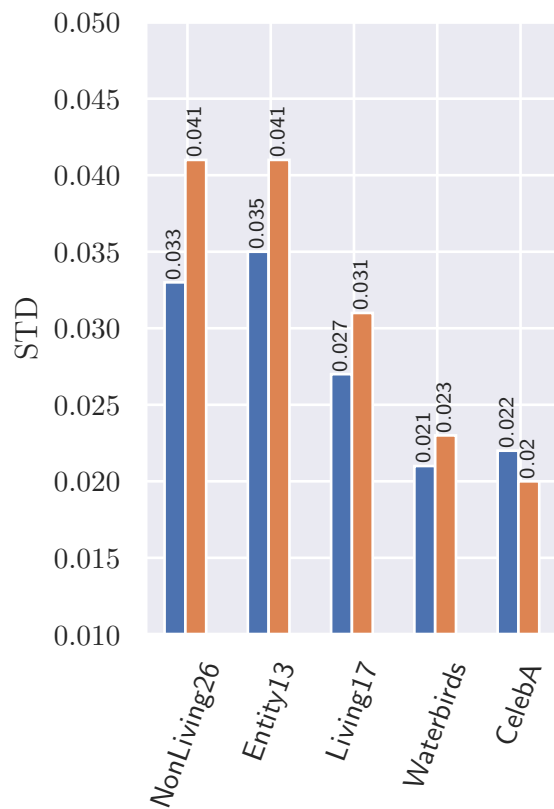

Supplement: supplementary_material [file attachment]

Number of Combinations of Tags

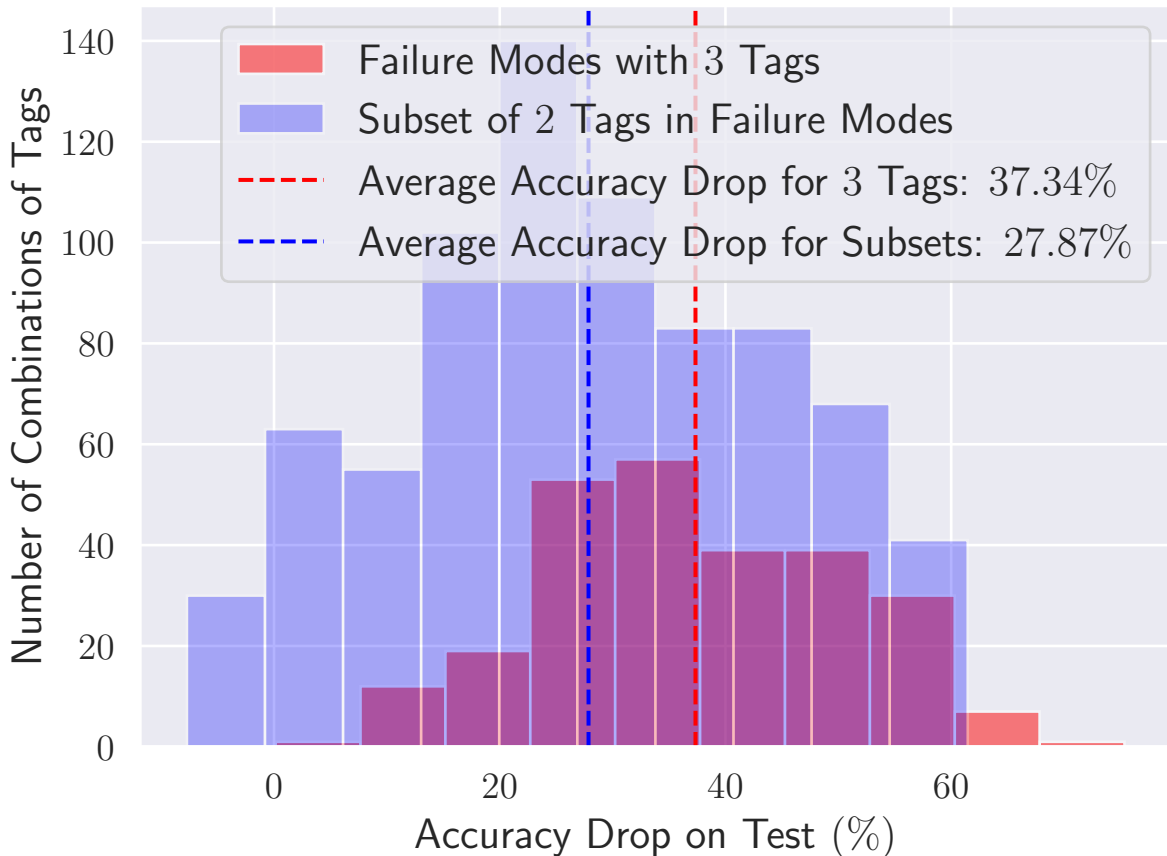

Supplement: supplementary_material [file attachment]

ape + **hang** + **branch** + **black** (41.18%)

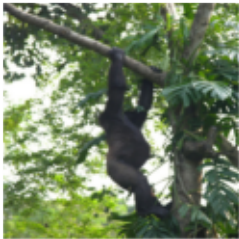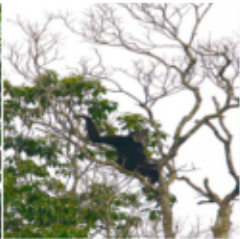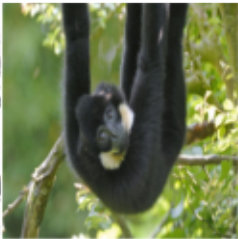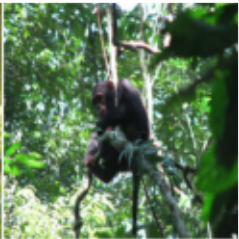

Supplement: supplementary_material [file attachment]

CUB-200

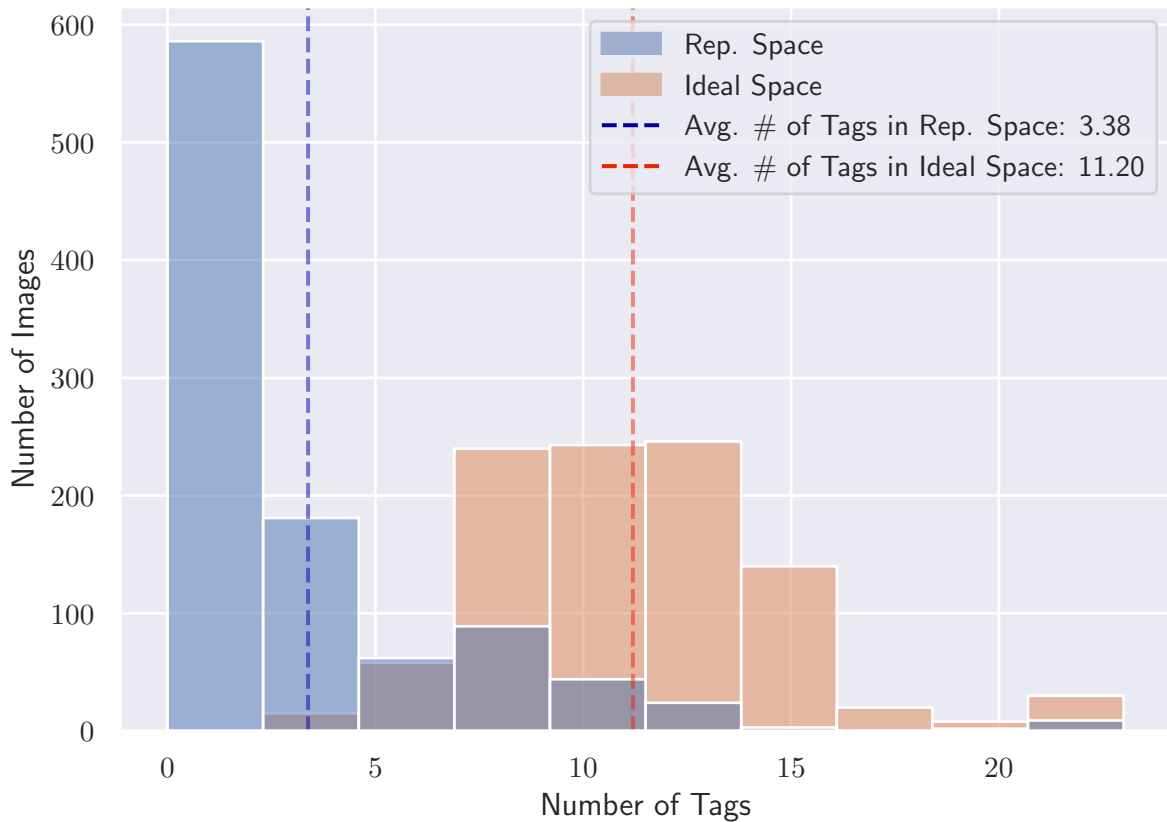

Supplement: supplementary_material [file attachment]

# Entity13 ( $s = 200, a = 30\%$ )

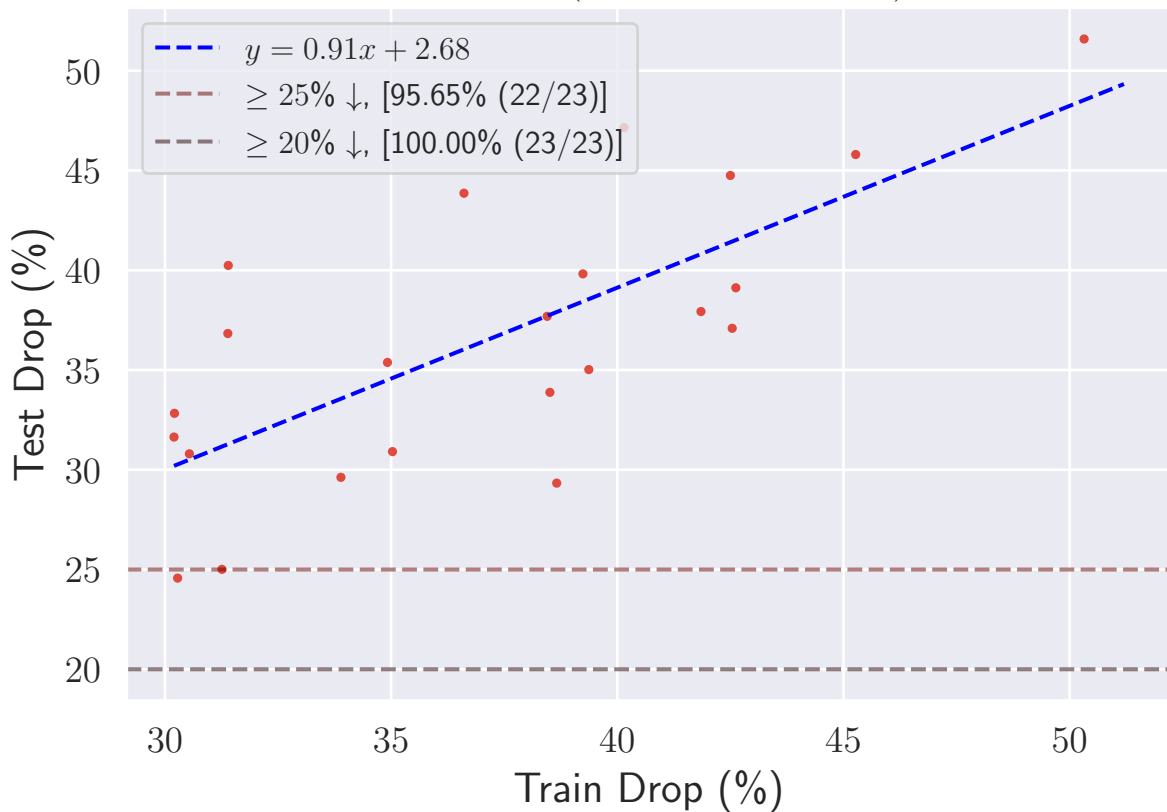

Supplement: supplementary_material [file attachment]

# Similarity Score Distribution → AUROC: 0.80

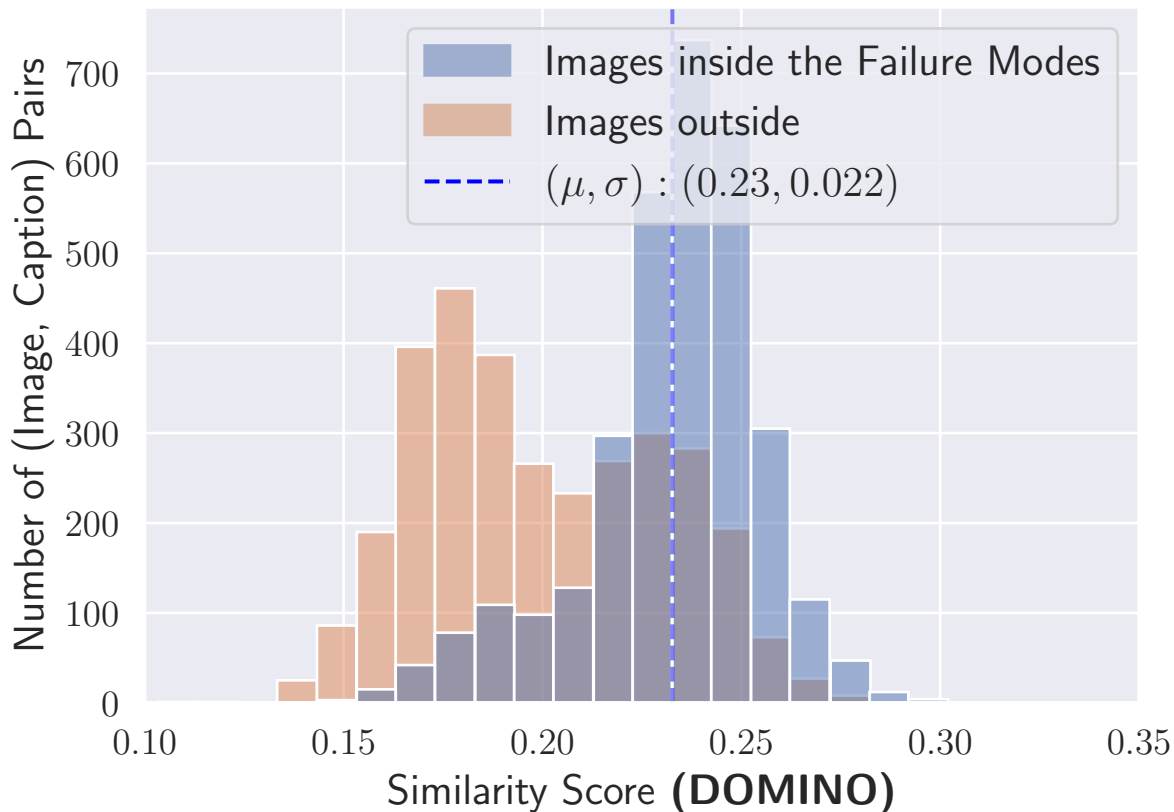

Supplement: supplementary_material [file attachment]

ape + **hang** (70.09%)

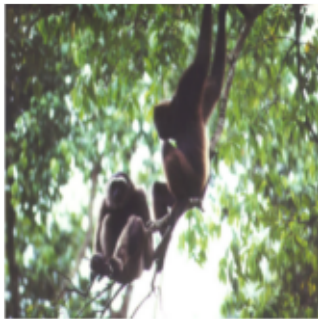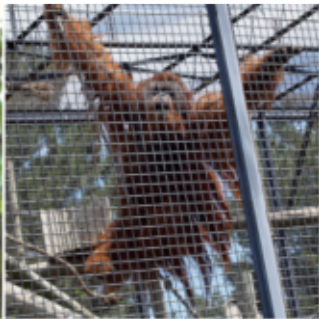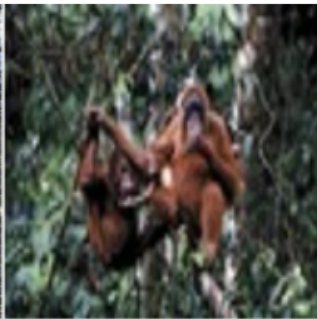

Supplement: supplementary_material [file attachment]
